# Supplementary material for: Copper-catalyzed oxidative dehydrogenative [3 + 2] annulation of oximes with α-amino ketones: entry to 3-aminopyrroles
Source: Royal Society of Chemistry journal article supplement (doi:10.1039/d4qo01307g), 2024-01-01
Supplement: d4qo01307g1.pdf [file d4qo01307g1.pdf]

# Supplementary Information

## Copper-catalyzed oxidative dehydrogenative [3 + 2] annulation of oximes with $\alpha$ -amino ketones: Entry to 3-aminopyrroles

Yan-Yun Liu,<sup>\*a</sup> Ming Hu,<sup>b</sup> and Jin-Heng Li<sup>\*bcd</sup>

---

<sup>a</sup> College of Chemical and Environmental Engineering, Hunan Institute of Technology, Hengyang 421002, China. E-mail:

[liuyanyun314@sina.com](mailto:liuyanyun314@sina.com)

<sup>b</sup> State Key Laboratory Base of Eco-Chemical Engineering, College of Chemical Engineering, Qingdao University of Science and Technology,

Qingdao 266042, China. E-mail: [jhli@hnu.edu.cn](mailto:jhli@hnu.edu.cn)

<sup>c</sup> State Key Laboratory of Applied Organic Chemistry, Lanzhou University, Lanzhou 730000, China

<sup>d</sup> School of Chemistry and Chemical Engineering, Henan Normal University, Xinxiang, Henan 453007, China

### List of Contents

(A) General Information

(B) Analytical Data

(C) NMR Spectra

(D) The X-Ray Single-Crystal Diffraction Analysis of 3la

(E) References

## (A) General Information

All  $^1\text{H}$  NMR,  $^{13}\text{C}$  NMR and  $^{19}\text{F}$  NMR spectra were recorded on a Agilent 400 MHz at room temperature using  $\text{CDCl}_3$  as solvent with tetramethylsilane as internal standard or  $\text{DMSO-}d_6$ . High-resolution mass spectra (HRMS) was recorded on an electrospray ionization (ESI) apparatus using time-of-flight (TOF) mass spectrometry. Column chromatography was generally performed on silica gel (300-400 mesh) using petroleum ether (PE)/ethyl acetate (EA), and reactions were monitored by thin layer chromatography (TLC) using UV light to visualize the course of the reactions. Melting points were measured on a YRT-3 and uncorrected. Unless otherwise noted, all reagents were purchased from commercial sources and were used as received. Oximes **1a-1r** were prepared according to literature procedures.<sup>[1]</sup>  $\alpha$ -Amino carbonyls **2a-2r** were prepared according to the reported methods.<sup>[2]</sup>

### (a) General experimental procedure

To a Schlenk tube were added  $\text{Cu}(\text{OAc})_2$  (10 mol%), Oxime **1** (0.3 mmol),  $\alpha$ -amino carbonyl compound **2** (0.45 mmol) and DMSO (2 mL). Then the tube was recharged with argon, and the mixture was stirred at 80 °C for 16 hours. After cooling to room temperature, the resulting mixture was extracted with EtOAc (3×10 mL). The combined organic extracts were washed with brine, dried over  $\text{Na}_2\text{SO}_4$  and concentrated in vacuum. The residue was purified by silica gel flash column chromatography (petroleum ether: ethyl acetate = 30 : 1) to afford the desired products **3**.

## (b) Gram-scale synthesis of **3aa** and **3ka**

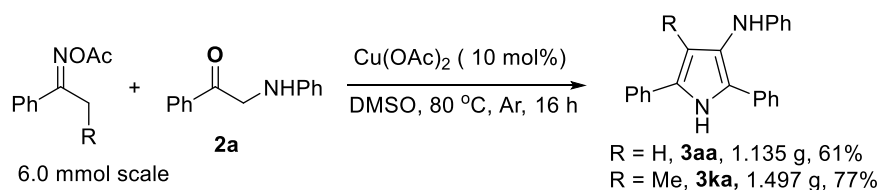

To a Schlenk tube were added  $\text{Cu}(\text{OAc})_2$  (109.0 mg, 10 mol%), oxime **1a** (1.062 g, 6 mmol, 1.0 equiv) or **1k** (1.146 g, 6 mmol, 1.0 equiv),  $\alpha$ -amino carbonyl compound **2a** (1.899 g, 9 mmol, 1.5 equiv.) and DMSO (40 mL). Then the tube was recharged with argon, and the mixture was stirred at 80 °C for 16 hours. After cooling to room temperature, the resulting mixture was extracted with EtOAc (3  $\times$  30 mL). The combined organic extracts were washed with brine, dried over  $\text{Na}_2\text{SO}_4$  and concentrated in vacuum. The residue was purified by silica gel flash column chromatography (hexane: ethyl acetate = 30 : 1) to afford the desired product **3aa** (1.135 g, 61%) or **3ka** (1.497 g, 77%).

## (c) Control experiments

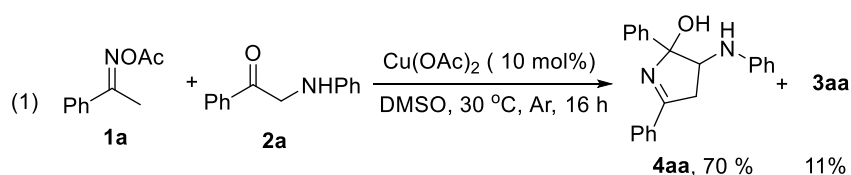

To a Schlenk tube were added **1a** (0.3 mmol, 53.1 mg), **2a** (0.45 mmol, 95.0 mg),  $\text{Cu}(\text{OAc})_2$  (0.03 mmol, 5.4 mg), and DMSO (2 mL) under an argon atmosphere was stirred at 30 °C for 16 h. The resulting mixture was extracted with EtOAc (3  $\times$  10 mL). The combined organic extracts were washed with brine, dried over  $\text{Na}_2\text{SO}_4$  and concentrated in vacuum. The residue was purified by silica gel flash column

chromatography (hexane: ethyl acetate = 30 : 1 to 5 : 1) to afford **4aa** (68.9 mg, 70% yield), **3aa** (10.2 mg, 11% yield).

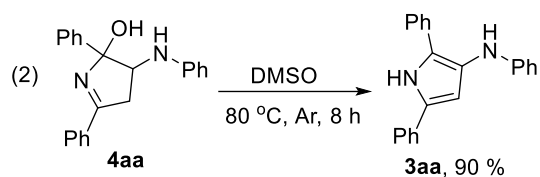

To a Schlenk tube were added **4aa** (0.2 mmol, 65.6 mg), and DMSO (2 mL) under an argon atmosphere was stirred at 80 °C for 8 h. After cooling to room temperature, the resulting mixture was extracted with EtOAc (3 × 10 mL). The combined organic extracts were washed with brine, dried over Na<sub>2</sub>SO<sub>4</sub> and concentrated in vacuum. The residue was purified by silica gel flash column chromatography (hexane: ethyl acetate = 30 : 1) to afford the desired product **3aa** (55.8 mg, 90% yield).

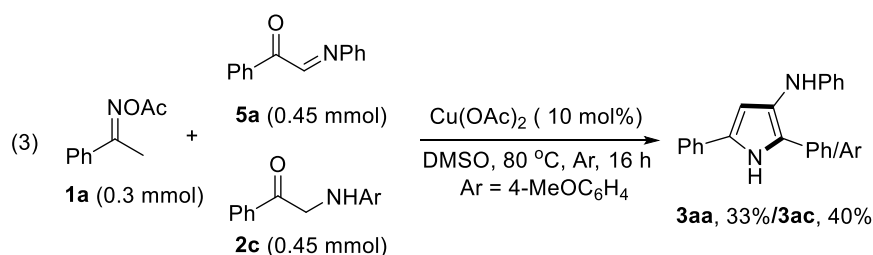

According to the general procedure, **1a** (0.3 mmol, 53.1 mg), **5a** (0.45 mmol, 94.1 mg), **2c** (0.45 mmol, 108.5 mg), Cu(OAc)<sub>2</sub> (0.03 mmol, 5.4 mg), and DMSO (2 mL) under an argon atmosphere was stirred at 80 °C for 16 h to afford **3aa** (30.7 mg, 33% yield), **3ac** (40.8 mg, 40% yield).

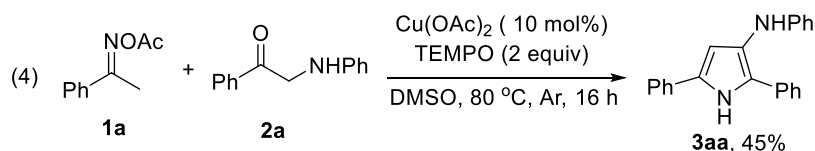

According to the general procedure, **1a** (0.3 mmol, 53.1 mg), **2a** (0.45 mmol, 95.0 mg), Cu(OAc)<sub>2</sub> (0.03 mmol, 5.4 mg), TEMPO (0.6 mmol, 93.8 mg) and DMSO (2

mL) under an argon atmosphere was stirred at 80 °C for 16 h to afford **3aa** (42.0 mg, 45% yield).

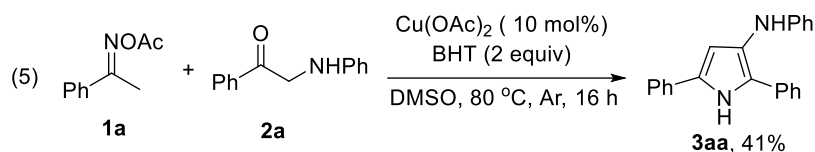

According to the general procedure, **1a** (0.3 mmol, 53.1 mg), **2a** (0.45 mmol, 95.0 mg), Cu(OAc)<sub>2</sub> (0.03 mmol, 5.4 mg), BHT (0.6 mmol, 132.0 mg) and DMSO (2 mL) under an argon atmosphere was stirred at 80 °C for 16 h to afford **3aa** (38.1 mg, 41% yield).

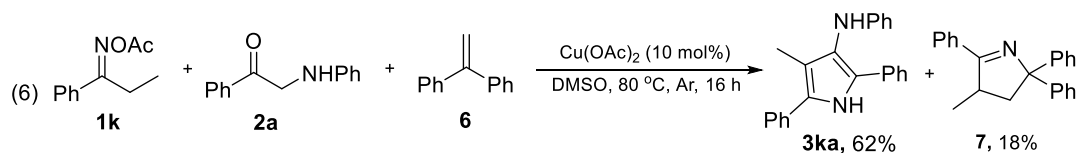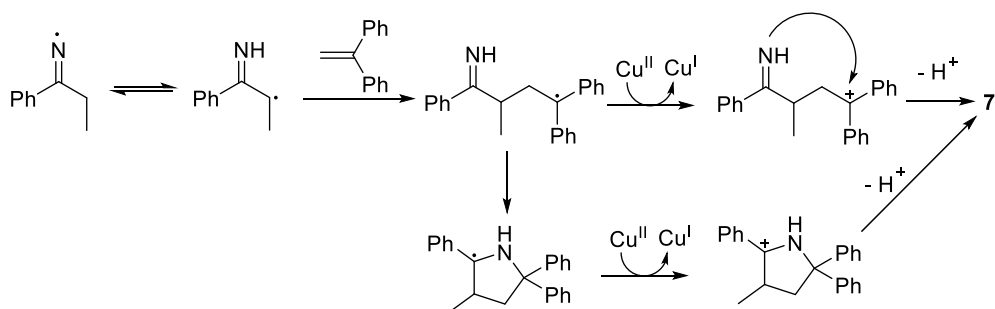

**Supplementary Scheme 1.** Proposed mechanistic pathways for the formation of pyrroline **7**

According to the general procedure, **1k** (0.3 mmol, 57.3 mg), **2a** (0.45 mmol, 95.0 mg), **6** (0.6 mmol, 108 mg), Cu(OAc)<sub>2</sub> (0.03 mmol, 5.4 mg), and DMSO (2 mL) under an argon atmosphere was stirred at 80 °C for 16 h to afford **3ka** (60.3 mg, 62% yield), pyrroline **7** (16.8 mg, 18% yield).

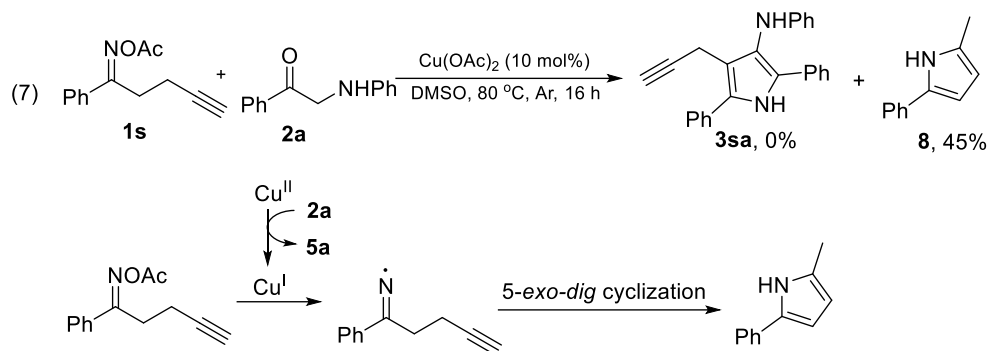

**Supplementary Scheme 2.** Proposed mechanistic pathways for the formation of pyrrole **8**

According to the general procedure, **1s** (0.3 mmol, 64.5 mg), **2a** (0.45 mmol, 95.0 mg), Cu(OAc)<sub>2</sub> (0.03 mmol, 5.4 mg), and DMSO (2 mL) under an argon atmosphere was stirred at 80 °C for 16 h to afford pyrrole **8** (21.2 mg, 45% yield), which could form via an iminyl radical 5-*exo-dig* cyclization. No desired product **3sa** was detected by GC-MS.

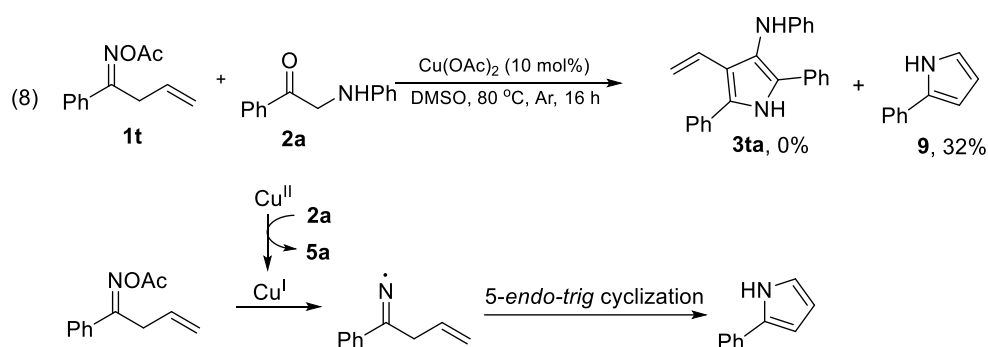

**Supplementary Scheme 3.** Proposed mechanistic pathways for the formation of pyrrole **9**

According to the general procedure, **1t** (0.3 mmol, 64.5 mg), **2a** (0.45 mmol, 95.0 mg), Cu(OAc)<sub>2</sub> (0.03 mmol, 5.4 mg), and DMSO (2 mL) under an argon atmosphere was stirred at 80 °C for 16 h to afford pyrrole **9** (13.7 mg, 32% yield), which could form via an iminyl radical 5-*endo-trig* cyclization.<sup>1d</sup> No desired product **3ta** was detected by GC-MS.

**(d) Some other unsuccessful substrates**

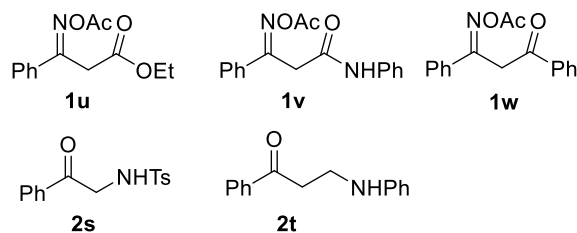

Substrates **1u**,<sup>1c</sup> **2s**,<sup>3</sup> **2t**<sup>4</sup> were prepared according to the reported methods. **1v** and **1w** were unreported substrates, and were synthesized from corresponding 1,3-diphenylpropane-1,3-dione/3-oxo-*N*,3-diphenylpropanamide according to literature procedures.<sup>1c</sup>

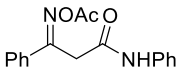 **3-(Acetoxyimino)-*N*,3-diphenylpropanamide (1v):** White solid; <sup>1</sup>H NMR (400 MHz, DMSO-*d*<sub>6</sub>) δ: 10.36 (s, 1H), 7.81 (d, *J* = 6.0 Hz, 2H), 7.57 (d, *J* = 6.4 Hz, 2H), 7.53-7.47 (m, 3H), 7.31 (t, *J* = 6.4 Hz, 2H), 7.05 (t, *J* = 6.0 Hz, 1H), 4.06 (s, 2H), 2.19 (s, 3H); <sup>13</sup>C NMR (100 MHz, DMSO-*d*<sub>6</sub>) δ: 168.5, 165.9, 160.9, 139.4, 134.6, 131.2, 129.3, 129.1, 127.6, 123.9, 119.6, 36.8, 20.0; HRMS *m/z* (ESI) calcd for C<sub>17</sub>H<sub>17</sub>N<sub>2</sub>O<sub>3</sub> (M+H)<sup>+</sup> 297.1234, found 297.1238.

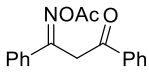 **3-(Acetoxyimino)-1,3-diphenylpropan-1-one (1w):** White solid; <sup>1</sup>H NMR (400 MHz, CDCl<sub>3</sub>) δ: 8.01 (d, *J* = 6.4 Hz, 2H), 7.12 (d, *J* = 6.4 Hz, 2H), 7.62 (t, *J* = 6.0 Hz, 1H), 7.50 (t, *J* = 6.0 Hz, 2H), 7.45-7.37 (m, 3H), 4.54 (s, 2H), 2.11 (s, 3H); <sup>13</sup>C NMR (100 MHz, CDCl<sub>3</sub>) δ: 193.0, 168.4, 159.9, 135.8, 134.0, 133.7, 130.6, 128.8, 128.6, 128.2, 127.1, 39.0, 19.5; HRMS *m/z* (ESI) calcd for C<sub>17</sub>H<sub>16</sub>NO<sub>3</sub> (M+H)<sup>+</sup> 282.1125, found 282.1123.

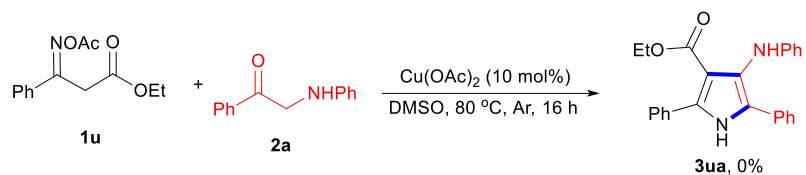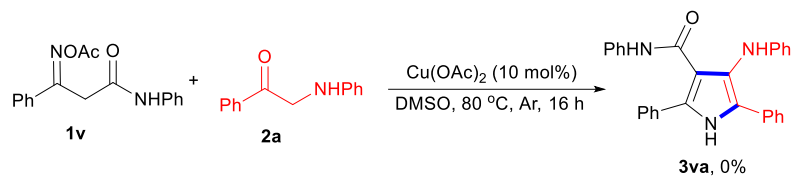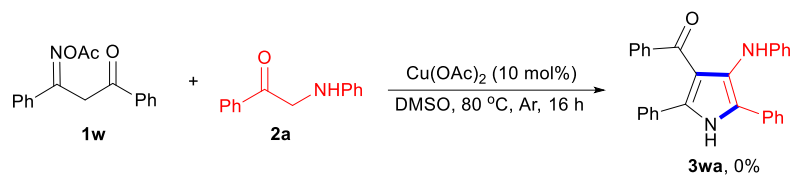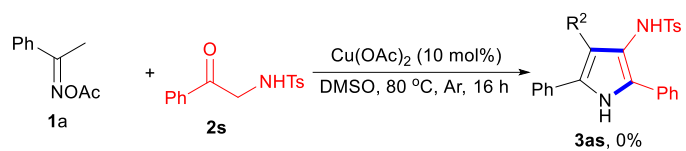

Nearly 100% of **2s** was recovered

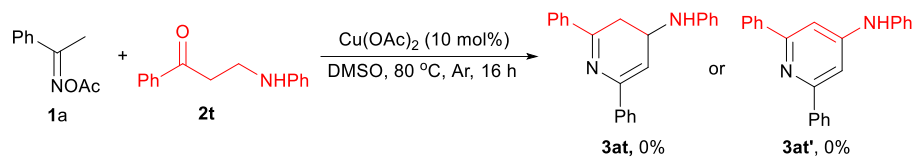

97% of **2t** was recovered



## (B) Analytical Data

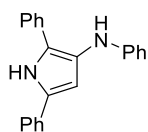

***N,2,5*-Triphenyl-1*H*-pyrrol-3-amine (3aa):** Light yellow oil; 66.0 mg, 71% yield;  $^1\text{H}$  NMR (400 MHz,  $\text{CDCl}_3$ )  $\delta$ : 8.30 (s, 1H), 7.57-7.55 (m, 2H), 7.51-7.49 (m, 2H), 7.40-7.34 (m, 4H), 7.23-7.18 (m, 4H), 6.84 (d,  $J = 8.0$  Hz, 2H), 6.77 (t,  $J = 7.2$  Hz, 1H), 6.56 (d,  $J = 3.2$  Hz, 1H), 5.20 (s, 1H);  $^{13}\text{C}$  NMR (100 MHz,  $\text{CDCl}_3$ )  $\delta$ : 147.2, 132.1, 131.8, 130.9, 129.2, 129.0, 126.5, 126.4, 125.5, 125.2, 124.8, 123.6, 118.1, 113.9, 105.7; HRMS  $m/z$  (ESI) calcd for  $\text{C}_{22}\text{H}_{18}\text{N}_2$  ( $\text{M}+\text{H}$ ) $^+$  311.1543, found 311.1548.

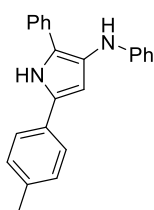

***N,2*-Diphenyl-5-*p*-tolyl-1*H*-pyrrol-3-amine (3ba):** Light yellow oil, 71.9 mg, 74% yield;  $^1\text{H}$  NMR (400 MHz,  $\text{CDCl}_3$ )  $\delta$ : 8.25 (s, 1H), 7.54 (d,  $J = 7.2$  Hz, 2H), 7.39-7.32 (m, 4H), 7.21-7.17 (m, 5H), 6.83 (d,  $J = 7.6$  Hz, 2H), 6.76 (t,  $J = 7.2$  Hz, 1H), 6.50 (d,  $J = 3.2$  Hz, 1H), 5.18 (s, 1H), 2.35 (s, 3H);  $^{13}\text{C}$  NMR (100 MHz,  $\text{CDCl}_3$ )  $\delta$ : 147.2, 136.4, 131.9, 131.1, 129.6, 129.4, 129.2, 128.9, 126.2, 125.2, 125.0, 124.8, 123.6, 118.1, 113.9, 105.2, 21.1; HRMS  $m/z$  (ESI) calcd for  $\text{C}_{23}\text{H}_{21}\text{N}_2$  ( $\text{M}+\text{H}$ ) $^+$  325.1699, found 325.1705.

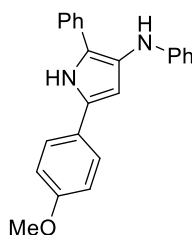

**5-(4-Methoxyphenyl)-*N,2*-diphenyl-1*H*-pyrrol-3-amine (3ca):** Light yellow oil, 78.5 mg, 77% yield;  $^1\text{H}$  NMR (400 MHz,  $\text{CDCl}_3$ )  $\delta$ : 8.20 (s, 1H), 7.50 (d,  $J = 7.2$  Hz, 2H), 7.40-7.36 (m, 2H), 7.31 (t,  $J = 8.0$  Hz, 2H), 7.19-7.14 (m, 3H), 6.90-6.87 (m, 2H), 6.80 (d,  $J = 7.6$  Hz, 2H), 6.74 (t,  $J = 7.6$  Hz, 1H), 6.41 (d,  $J = 2.8$  Hz, 1H), 5.14 (s, 1H), 3.77 (s, 3H);  $^{13}\text{C}$  NMR (100 MHz,  $\text{CDCl}_3$ )  $\delta$ : 158.4, 147.2, 131.9, 130.9, 129.2, 128.9, 126.1, 125.2, 125.1, 125.0,

124.7 (2C), 118.0, 114.4, 113.9, 104.7, 55.3; HRMS  $m/z$  (ESI) calcd for  $C_{23}H_{21}N_2O$  (M+H)<sup>+</sup> 341.1648, found 341.1654.

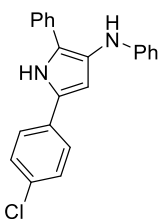

**5-(4-Chlorophenyl)-N,2-diphenyl-1H-pyrrol-3-amine (3da):**

Light yellow oil, 72.2 mg, 70% yield; <sup>1</sup>H NMR (400 MHz, CDCl<sub>3</sub>)

δ: 8.24 (s, 1H), 7.55-7.53 (m, 2H), 7.40-7.31 (m, 6H), 7.23-7.17 (m,

3H), 6.83-6.75 (m, 3H), 6.53 (d,  $J = 2.8$  Hz, 1H), 5.17 (s, 1H); <sup>13</sup>C NMR (100 MHz, CDCl<sub>3</sub>) δ: 147.0, 132.0, 131.6, 130.6, 129.7, 129.2, 129.0, 128.9, 126.5, 125.8, 125.3,

125.0, 124.7, 118.2, 113.9, 106.0; HRMS  $m/z$  (ESI) calcd for  $C_{22}H_{18}ClN_2$  (M+H)<sup>+</sup> 345.1153, found 345.1155.

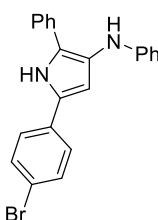

**5-(4-Bromophenyl)-N,2-diphenyl-1H-pyrrol-3-amine (3ea):**

Light yellow oil, 83.8 mg, 72% yield; <sup>1</sup>H NMR (400 MHz, CDCl<sub>3</sub>)

δ: 8.26 (s, 1H), 7.54 (d,  $J = 7.2$  Hz, 2H), 7.50-7.46 (m, 2H),

7.37-7.32 (m, 4H), 7.23-7.17 (m, 3H), 6.83-6.75 (m, 3H), 6.54 (d,  $J = 2.8$  Hz, 1H), 5.17 (s, 1H); <sup>13</sup>C NMR (100 MHz, CDCl<sub>3</sub>) δ: 147.0, 132.0, 131.6, 131.1, 129.7, 129.3,

129.0, 126.6, 125.9, 125.3, 125.1, 125.0, 120.0, 118.3, 114.0, 106.1; HRMS  $m/z$  (ESI) calcd for  $C_{22}H_{18}BrN_2$  (M+H)<sup>+</sup> 389.0648, found 389.0657.

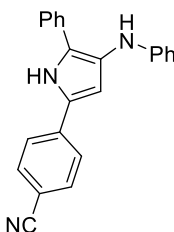

**4-(5-Phenyl-4-(phenylamino)-1H-pyrrol-2-yl)benzotrile (3fa):**

Light-yellow solid; 60.3 mg, 60% yield; mp 198-199 °C; <sup>1</sup>H NMR

(400 MHz, DMSO-*d*<sub>6</sub>) δ: 11.4 (s, 1H), 7.97 (d,  $J = 8.4$  Hz, 2H),

7.79 (d,  $J = 6.8$  Hz, 4H), 7.36 (t,  $J = 8.0$  Hz, 2H), 7.32 (s, 1H), 7.21 (t,  $J = 7.2$  Hz, 1H),

7.07 (t,  $J = 8.0$  Hz, 2H), 6.80 (d,  $J = 2.8$  Hz, 1H), 6.72 (d,  $J = 8.0$  Hz, 2H), 6.57 (t,  $J =$

7.2 Hz, 1H); <sup>13</sup>C NMR (100 MHz, DMSO-*d*<sub>6</sub>) δ: 148.6, 137.0, 133.1, 132.1, 129.5,

129.2, 128.9, 126.8, 126.5, 125.8, 124.5, 119.9, 117.1, 113.6, 109.4, 107.7; HRMS  $m/z$  (ESI) calcd for  $C_{23}H_{18}N_3$  ( $M+H$ )<sup>+</sup> 336.1495, found 336.1491.

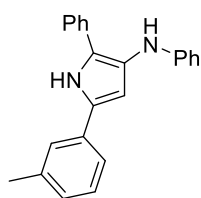

***N,2*-diphenyl-5-(*m*-tolyl)-1*H*-pyrrol-3-amine (3ga):** Light yellow oil, 71.0 mg, 73% yield; <sup>1</sup>H NMR (400 MHz, CDCl<sub>3</sub>) δ: 8.29 (s, 1H),

7.53 (d,  $J = 7.2$  Hz, 2H), 7.35-7.16 (m, 8H), 7.03 (d,  $J = 6.8$  Hz, 1H), 6.82 (d,  $J = 8.4$  Hz, 2H), 6.75 (t,  $J = 7.2$  Hz, 1H), 6.52 (d,  $J = 2.8$  Hz, 1H), 5.16

(s, 1H), 2.36 (s, 3H); <sup>13</sup>C NMR (100 MHz, CDCl<sub>3</sub>) δ: 147.2, 138.5, 132.0, 131.8, 131.0, 129.2, 128.9, 128.8, 128.4, 127.4, 126.3, 125.3, 125.2, 124.8, 124.3, 120.7, 118.1, 113.9, 21.5; HRMS  $m/z$  (ESI) calcd for  $C_{22}H_{18}N_3O_2$  ( $M+H$ )<sup>+</sup> 325.1699, found 325.1705.

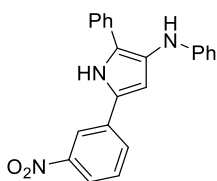

**5-(3-Nitrophenyl)-*N,2*-diphenyl-1*H*-pyrrol-3-amine (3ha):**

Red solid, 66.0 mg, 62% yield; mp 145-146 °C (uncorrected); <sup>1</sup>H

NMR (400 MHz, CDCl<sub>3</sub>) δ: 8.54 (s, 1H), 8.27 (t,  $J = 1.6$  Hz, 1H),

7.98 (dd,  $J = 8.0, 1.6$  Hz, 1H), 7.75 (d,  $J = 7.6$  Hz, 1H), 7.56 (d,  $J = 7.2$  Hz, 2H), 7.47 (t,  $J = 8.0$  Hz, 1H), 7.35 (t,  $J = 7.6$  Hz, 2H), 7.25-7.18 (m, 3H), 6.83-6.76 (m, 3H),

6.65 (d,  $J = 2.8$  Hz, 1H), 5.18 (s, 1H); <sup>13</sup>C NMR (100 MHz, CDCl<sub>3</sub>) δ: 148.7, 146.8, 133.7, 131.2, 129.8, 129.3, 129.2, 129.0, 128.2, 127.0, 126.9, 125.5, 125.3, 120.6,

118.5, 117.7, 114.0, 107.2; HRMS  $m/z$  (ESI) calcd for  $C_{22}H_{18}N_3O_2$  ( $M+H$ )<sup>+</sup> 356.1394, found 356.1392.

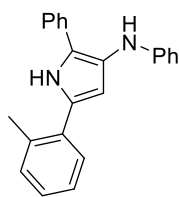

***N,2*-diphenyl-5-(*o*-tolyl)-1*H*-pyrrol-3-amine (3ia):** Light yellow oil,

69.0 mg, 71% yield; <sup>1</sup>H NMR (400 MHz, CDCl<sub>3</sub>) δ: 8.13 (s, 1H),

8.02 (d,  $J = 7.2$  Hz, 2H), 7.39 (d,  $J = 8.0$  Hz, 1H), 7.33 (t,  $J = 8.0$  Hz,

2H), 7.26-7.17 (m, 6H), 6.83 (d,  $J = 8.0$  Hz, 2H), 6.75 (t,  $J = 7.2$  Hz, 1H), 6.38 (d,  $J = 2.8$  Hz, 1H), 5.19 (s, 1H), 2.48 (s, 3H);  $^{13}\text{C}$  NMR (100 MHz,  $\text{CDCl}_3$ )  $\delta$ : 147.3, 135.0, 132.2, 131.9, 131.2, 130.2, 129.2, 128.9, 127.4, 127.0, 126.21, 126.15, 125.1, 124.7, 123.9, 118.0, 113.8, 108.8, 21.3; HRMS  $m/z$  (ESI) calcd for  $\text{C}_{22}\text{H}_{18}\text{N}_3\text{O}_2$  ( $\text{M}+\text{H}$ ) $^+$  325.1699, found 325.1703.

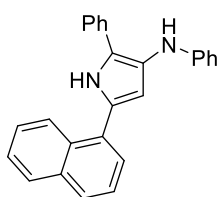

**5-(Naphthalen-1-yl)-N,2-diphenyl-1H-pyrrol-3-amine (3ja):**

Light yellow oil, 71.3 mg, 66% yield;  $^1\text{H}$  NMR (400 MHz,  $\text{CDCl}_3$ )  $\delta$ : 8.38-8.36 (m, 1H), 8.28 (s, 1H), 7.89-7.85 (m, 1H), 7.79 (d,  $J = 8.0$  Hz, 1H), 7.56-7.46 (m, 6H), 7.32 (t,  $J = 8.0$  Hz, 2H), 7.22-7.16 (m, 3H), 6.87 (d,  $J = 8.4$  Hz, 2H), 6.76 (t,  $J = 7.2$  Hz, 1H), 6.54 (d,  $J = 2.8$  Hz, 1H), 5.24 (s, 1H);  $^{13}\text{C}$  NMR (100 MHz,  $\text{CDCl}_3$ )  $\delta$ : 147.3, 134.0, 131.9, 131.1, 131.0, 129.6, 129.3, 129.0, 128.5, 127.8, 126.5, 126.3, 126.0, 125.8, 125.5, 125.4, 125.2, 124.2, 118.1, 113.9, 109.3; HRMS  $m/z$  (ESI) calcd for  $\text{C}_{26}\text{H}_{21}\text{N}_2$  ( $\text{M}+\text{H}$ ) $^+$  361.1699, found 361.1703.

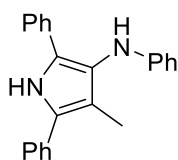

**4-Methyl-N,2,5-triphenyl-1H-pyrrol-3-amine (3ka):**

Light yellow oil, 83.6 mg, 86% yield;  $^1\text{H}$  NMR (400 MHz,  $\text{CDCl}_3$ )  $\delta$ : 8.09 (s, 1H), 7.49 (t,  $J = 7.6$  Hz, 4H), 7.41 (t,  $J = 7.6$  Hz, 2H), 7.31-7.23 (m, 3H), 7.19-7.15 (m, 3H), 6.74-6.67 (m, 3H), 5.06 (s, 1H), 2.08 (s, 3H);  $^{13}\text{C}$  NMR (100 MHz,  $\text{CDCl}_3$ )  $\delta$ : 147.9, 133.4, 131.8, 129.2, 128.9, 128.8, 127.7, 126.6, 126.3 (2C), 126.0, 125.1, 123.3, 117.7, 116.8, 113.3, 9.8; HRMS  $m/z$  (ESI) calcd for  $\text{C}_{23}\text{H}_{21}\text{N}_2$  ( $\text{M}+\text{H}$ ) $^+$  325.1699, found 325.1705.

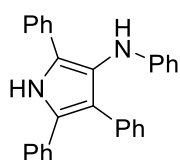

**N,2,4,5-Tetraphenyl-1H-pyrrol-3-amine (3la):**

Light yellow solid, 103.1 mg, 89% yield; mp 170-171 °C (uncorrected);  $^1\text{H}$  NMR (400

MHz, CDCl<sub>3</sub>)  $\delta$ : 8.36 (s, 1H), 7.57 (d,  $J$  = 7.6 Hz, 2H), 7.30-7.08 (m, 15H), 6.69 (t,  $J$  = 7.6 Hz, 1H), 6.62 (d,  $J$  = 8.0 Hz, 2H), 5.04 (s, 1H); <sup>13</sup>C NMR (100 MHz, CDCl<sub>3</sub>)  $\delta$ : 148.1, 134.0, 132.6, 131.5, 130.2, 129.1, 128.8, 128.6, 128.3, 128.0, 126.9, 126.7 (2C), 126.4, 126.3, 124.9, 122.5, 121.9, 117.9, 113.8; HRMS  $m/z$  (ESI) calcd for C<sub>28</sub>H<sub>23</sub>N<sub>2</sub> (M+H)<sup>+</sup> 387.1856, found 387.1851.

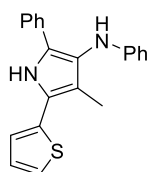

**4-Methyl-N,2-diphenyl-5-(thiophen-2-yl)-1H-pyrrol-3-amine (3ma):**

Brown oil, 76.2 mg, 77% yield; <sup>1</sup>H NMR (400 MHz, CDCl<sub>3</sub>)  $\delta$ : 8.09 (s, 1H), 7.48 (d,  $J$  = 7.6 Hz, 2H), 7.29 (t,  $J$  = 7.6 Hz, 2H), 7.22-7.15 (m, 4H), 7.08-7.06 (m, 2H), 6.73 (t,  $J$  = 7.6 Hz, 1H), 6.66 (d,  $J$  = 8.0 Hz, 2H), 5.03 (s, 1H), 2.08 (s, 3H); <sup>13</sup>C NMR (100 MHz, CDCl<sub>3</sub>)  $\delta$ : 147.8, 135.7, 131.5, 129.3, 128.9, 127.6, 126.6, 126.5, 125.1, 123.2, 123.0, 122.5, 121.9, 117.7, 117.3, 113.2, 9.7; HRMS  $m/z$  (ESI) calcd for C<sub>21</sub>H<sub>19</sub>N<sub>2</sub>S (M+H)<sup>+</sup> 331.1263, found 331.1275.

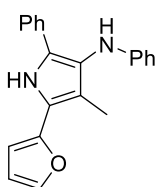

**5-(Furan-2-yl)-4-methyl-N,2-diphenyl-1H-pyrrol-3-amine (3na):**

Brown oil, 67.8 mg, 72% yield; <sup>1</sup>H NMR (400 MHz, CDCl<sub>3</sub>)  $\delta$ : 8.44 (s, 1H), 7.49 (d,  $J$  = 7.6 Hz, 2H), 7.38 (s, 1H), 7.28 (t,  $J$  = 7.6 Hz, 2H), 7.15 (t,  $J$  = 8.0 Hz, 3H), 6.72 (t,  $J$  = 7.6 Hz, 1H), 6.64 (d,  $J$  = 8.0 Hz, 2H), 6.48-6.47 (m, 1H), 6.33 (d,  $J$  = 3.6 Hz, 1H), 5.00 (s, 1H), 2.04 (s, 3H); <sup>13</sup>C NMR (100 MHz, CDCl<sub>3</sub>)  $\delta$ : 147.9, 147.8, 140.0, 131.5, 129.2, 128.8, 126.4, 126.2, 125.0, 122.9, 119.9, 117.7, 116.4, 113.2, 111.7, 103.4, 9.5; HRMS  $m/z$  (ESI) calcd for C<sub>21</sub>H<sub>19</sub>N<sub>2</sub>O (M+H)<sup>+</sup> 315.1492, found 315.1502.

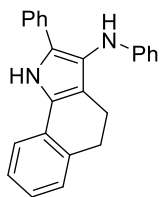

**N,2-Diphenyl-4,5-dihydro-1H-benzo[g]indol-3-amine (3oa):** Light

yellow oil, 79.6 mg, 79% yield;  $^1\text{H}$  NMR (400 MHz,  $\text{CDCl}_3$ )  $\delta$ : 8.31

(s, 1H), 7.54 (d,  $J = 7.2$  Hz, 2H), 7.33 (t,  $J = 7.6$  Hz, 2H), 7.27-7.15

(m, 6H), 7.10-7.06 (m, 1H), 6.75-6.69 (m, 3H), 5.08 (s, 1H), 2.88 (t,  $J = 8.0$  Hz, 2H),

2.54 (t,  $J = 8.0$  Hz, 2H);  $^{13}\text{C}$  NMR (100 MHz,  $\text{CDCl}_3$ )  $\delta$ : 147.6, 135.1, 132.0, 129.2,

128.9, 128.8, 128.5, 126.9, 126.7, 126.6, 126.3, 125.5, 125.2, 121.2, 119.9, 118.1,

117.8, 113.4, 29.5, 19.9; HRMS  $m/z$  (ESI) calcd for  $\text{C}_{24}\text{H}_{21}\text{N}_2$  ( $\text{M}+\text{H}$ ) $^+$  337.1699,

found 337.1702.

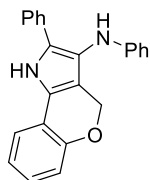

**N,2-Diphenyl-1,4-dihydrochromeno[4,3-*b*]pyrrol-3-amine (3pa):**

Light yellow oil, 71.0 mg, 70% yield;  $^1\text{H}$  NMR (400 MHz,  $\text{CDCl}_3$ )  $\delta$ :

8.33 (s, 1H), 7.50 (d,  $J = 7.6$  Hz, 2H), 7.33 (t,  $J = 7.6$  Hz, 2H),

7.24-7.16 (m, 4H), 7.06 (t,  $J = 7.2$  Hz, 1H), 6.94-6.88 (m, 2H), 6.76 (t,  $J = 7.6$  Hz,

1H), 6.70 (d,  $J = 8.0$  Hz, 2H), 5.12 (s, 2H), 5.00 (s, 1H);  $^{13}\text{C}$  NMR (100 MHz,  $\text{CDCl}_3$ )

$\delta$ : 152.7, 147.1, 131.5, 129.4, 129.0, 127.4 (2C), 126.7, 125.3, 122.7, 121.4, 119.2,

118.5, 118.3, 117.7, 116.8, 113.9, 113.3, 64.8; HRMS  $m/z$  (ESI) calcd for  $\text{C}_{23}\text{H}_{19}\text{N}_2\text{O}$

( $\text{M}+\text{H}$ ) $^+$  339.1492, found 339.1490.

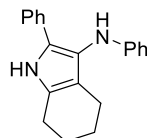

**N,2-Diphenyl-4,5,6,7-tetrahydro-1H-indol-3-amine (3qa):** Light

yellow oil, 36.3 mg, 42% yield;  $^1\text{H}$  NMR (400 MHz,  $\text{CDCl}_3$ )  $\delta$ : 7.74 (s,

1H), 7.44 (d,  $J = 7.6$  Hz, 2H), 7.27 (t,  $J = 7.6$  Hz, 2H), 7.17-7.10 (m, 3H), 6.73-6.67

(m, 3H), 5.02 (s, 1H), 2.61 (t,  $J = 6.0$  Hz, 2H), 2.29 (t,  $J = 6.0$  Hz, 2H), 1.85-1.80 (m,

2H), 1.72-1.67 (m, 2H);  $^{13}\text{C}$  NMR (100 MHz,  $\text{CDCl}_3$ )  $\delta$ : 147.9, 132.5, 129.1, 128.7,

126.8, 125.6, 124.7, 124.0, 120.5, 117.4, 117.3, 113.4, 23.2, 22.9, 21.0; LRMS (EI, 70

eV)  $m/z$  (%): 288 ( $M^+$ , 100), 259 (43), 207 (14), 129 (14); HRMS  $m/z$  (ESI) calcd for  $C_{20}H_{21}N_2$  ( $M+H$ )<sup>+</sup> 289.1699, found 289.1701.

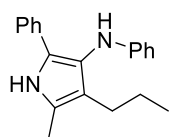

***N*,2-Diphenyl-4,5,6,7-tetrahydro-1*H*-indol-3-amine (3ra):** Light

yellow oil, 33.1 mg, 38% yield; <sup>1</sup>H NMR (400 MHz, CDCl<sub>3</sub>) δ: 7.87 (s, 1H), 7.44 (d,  $J = 7.2$  Hz, 2H), 7.25 (t,  $J = 7.6$  Hz, 2H), 7.15-7.07 (m, 3H), 6.71-6.62 (m, 3H), 4.98 (s, 1H), 2.25 (t,  $J = 7.6$  Hz, 2H), 2.24 (s, 3H), 1.46-1.37 (m, 2H), 0.83 (t,  $J = 7.6$  Hz, 3H); <sup>13</sup>C NMR (100 MHz, CDCl<sub>3</sub>) δ: 148.4, 132.2, 129.1, 128.7, 125.4, 124.4, 124.1, 123.6, 121.5, 119.6, 117.3, 113.2, 25.7, 23.9, 14.0, 11.8; HRMS  $m/z$  (ESI) calcd for  $C_{20}H_{21}N_2$  ( $M+H$ )<sup>+</sup> 291.1856, found 291.1854.

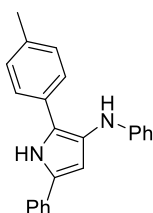

***N*,5-Diphenyl-2-*p*-tolyl-1*H*-pyrrol-3-amine (3ab):** Light yellow oil,

70.0 mg, 72% yield; <sup>1</sup>H NMR (400 MHz, CDCl<sub>3</sub>) δ: 8.25 (s, 1H), 7.48-7.42 (m, 4H), 7.36 (t,  $J = 7.6$  Hz, 2H), 7.23-7.14 (m, 5H), 6.82 (d,  $J = 8.0$  Hz, 2H), 6.75 (t,  $J = 7.2$  Hz, 1H), 6.54 (d,  $J = 2.8$  Hz, 1H), 5.15 (s, 1H), 2.33 (s, 3H); <sup>13</sup>C NMR (100 MHz, CDCl<sub>3</sub>) δ: 147.3, 136.2, 132.2, 130.5, 129.6, 129.2, 129.0, 128.9, 126.4, 125.7, 125.2, 124.4, 123.5, 118.0, 113.9, 105.7, 21.1; HRMS  $m/z$  (ESI) calcd for  $C_{23}H_{21}N_2$  ( $M+H$ )<sup>+</sup> 325.1699, found 325.1703.

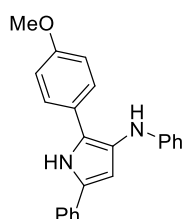

**2-(4-Methoxyphenyl)-*N*,5-diphenyl-1*H*-pyrrol-3-amine (3ac):**

Light yellow oil, 75.5 mg, 74% yield; <sup>1</sup>H NMR (400 MHz, CDCl<sub>3</sub>) δ: 8.25 (s, 1H), 7.49-7.46 (m, 4H), 7.36 (t,  $J = 8.0$  Hz, 2H), 7.23-7.17 (m, 3H), 6.91-6.87 (m, 2H), 6.81 (d,  $J = 7.6$  Hz, 2H), 6.75 (t,  $J = 7.2$  Hz, 1H), 6.53 (d,  $J = 2.8$  Hz, 1H), 5.14 (s, 1H), 3.78 (s, 3H); <sup>13</sup>C NMR (100 MHz, CDCl<sub>3</sub>) δ: 158.3, 147.5, 132.3, 130.2, 129.2, 128.9, 126.8, 126.3, 125.9, 124.6, 123.7, 123.5, 118.0,

114.4, 113.8, 105.8, 55.3; HRMS  $m/z$  (ESI) calcd for  $C_{23}H_{21}N_2O$  (M+H)<sup>+</sup> 341.1648, found 341.1652.

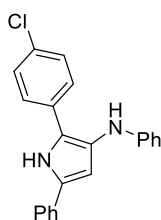

**2-(4-Chlorophenyl)-N,5-diphenyl-1H-pyrrol-3-amine (3ad):** Light

yellow oil, 72.2 mg, 70% yield; <sup>1</sup>H NMR (400 MHz, CDCl<sub>3</sub>) δ: 8.28

(s, 1H), 7.48 (d,  $J$  = 8.4 Hz, 4H), 7.39-7.36 (m, 2H), 7.31-7.28 (m,

2H), 7.25-7.17 (m, 3H), 6.81-6.75 (m, 3H), 6.53 (d,  $J$  = 2.8 Hz, 1H), 5.12 (s, 1H); <sup>13</sup>C

NMR (100 MHz, CDCl<sub>3</sub>) δ: 147.0, 131.9 (2C), 131.3, 130.2, 129.3, 129.1, 129.0,

126.8, 126.3, 125.3, 124.6, 123.7, 118.4, 114.0, 106.0; HRMS  $m/z$  (ESI) calcd for

$C_{22}H_{18}ClN_2$  (M+H)<sup>+</sup> 345.1153, found 345.1153.

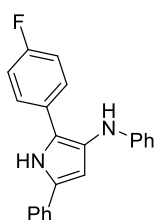

**2-(4-Fluorophenyl)-N,5-diphenyl-1H-pyrrol-3-amine (3ae):** Light

yellow oil, 67.9 mg, 69% yield; <sup>1</sup>H NMR (400 MHz, CDCl<sub>3</sub>) δ: 8.23 (s,

1H), 7.52-7.47 (m, 4H), 7.37 (t,  $J$  = 8.0 Hz, 2H), 7.25-7.17 (m, 3H),

7.06-7.00 (m, 2H), 6.81-6.74 (m, 3H), 6.53 (d,  $J$  = 3.2 Hz, 1H), 5.11 (s, 1H); <sup>13</sup>C

NMR (100 MHz, CDCl<sub>3</sub>) δ: 161.4 (d,  $J$  = 245.2 Hz), 147.2, 132.0, 130.9, 129.3, 129.0,

128.0 (d,  $J$  = 3.3 Hz), 127.0 (d,  $J$  = 7.8 Hz), 126.6, 125.1, 124.5, 123.6, 118.2, 115.9

(d,  $J$  = 21.4 Hz), 113.9, 105.9; <sup>19</sup>F NMR (376 MHz, CDCl<sub>3</sub>): δ: -115.2 (s, 1F); HRMS

$m/z$  (ESI) calcd for  $C_{22}H_{18}FN_2$  (M+H)<sup>+</sup> 329.1449, found 329.1452.

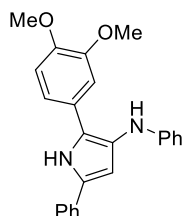

**2-(3,4-Dimethoxyphenyl)-N,5-diphenyl-1H-pyrrol-3-amine (3af):**

Light yellow oil, 81.0 mg, 73% yield; <sup>1</sup>H NMR (400 MHz, CDCl<sub>3</sub>) δ:

8.39 (s, 1H), 7.48 (d,  $J$  = 7.6 Hz, 2H), 7.35 (t,  $J$  = 8.0 Hz, 2H),

7.22-7.14 (m, 3H), 7.09 (d,  $J$  = 2.0 Hz, 1H), 7.01 (dd,  $J$  = 8.4, 2.0 Hz, 1H), 6.83-6.71

(m, 4H), 6.52 (d,  $J$  = 3.2 Hz, 1H), 5.15 (s, 1H), 3.82 (s, 3H), 3.59 (s, 3H); <sup>13</sup>C NMR



(100 MHz, CDCl<sub>3</sub>)  $\delta$ : 149.0, 147.7, 147.6, 132.2, 130.2, 129.2, 128.9, 126.3, 126.2, 124.8, 123.6, 123.5, 118.0, 117.3, 113.6, 111.4, 109.4, 106.3, 55.8, 55.4; HRMS  $m/z$  (ESI) calcd for C<sub>24</sub>H<sub>23</sub>N<sub>2</sub>O<sub>2</sub> (M+H)<sup>+</sup> 371.1754, found 371.1766.

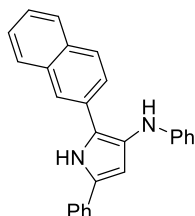

**2-(Naphthalen-2-yl)-N,5-diphenyl-1H-pyrrol-3-amine (3ag):**

Light yellow oil, 71.3 mg, 66% yield; <sup>1</sup>H NMR (400 MHz, CDCl<sub>3</sub>)  $\delta$ : 8.38 (s, 1H), 7.90 (s, 1H), 7.79-7.72 (m, 4H), 7.51 (d,  $J$  = 7.6 Hz, 2H), 7.46-7.36 (m, 4H), 7.25-7.18 (m, 3H), 6.86 (d,  $J$  = 7.6 Hz, 2H), 6.78 (t,  $J$  = 7.2 Hz, 1H), 6.59 (d,  $J$  = 2.8 Hz, 1H), 5.24 (s, 1H); <sup>13</sup>C NMR (100 MHz, CDCl<sub>3</sub>)  $\delta$ : 147.0, 133.7, 132.1, 131.9, 131.2, 129.3 (2C), 129.0, 128.6, 127.8, 127.7, 126.6, 126.4, 125.6, 125.5, 125.3, 124.0, 123.7, 123.0, 118.3, 114.1, 105.7; HRMS  $m/z$  (ESI) calcd for C<sub>26</sub>H<sub>21</sub>N<sub>2</sub> (M+H)<sup>+</sup> 361.1699, found 361.1702.

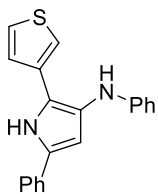

**N,5-Diphenyl-2-(thiophen-3-yl)-1H-pyrrol-3-amine (3ah):**

Light yellow solid, 68.3 mg, 72% yield; mp 48-49 °C (uncorrected); <sup>1</sup>H NMR (400 MHz, CDCl<sub>3</sub>)  $\delta$ : 8.26 (s, 1H), 7.46 (d,  $J$  = 7.6 Hz, 2H), 7.36 (t,  $J$  = 7.6 Hz, 2H), 7.31-7.27 (m, 3H), 7.23-7.16 (m, 3H), 6.79-6.73 (m, 3H), 6.49 (d,  $J$  = 2.8 Hz, 1H), 5.11 (s, 1H); <sup>13</sup>C NMR (100 MHz, CDCl<sub>3</sub>)  $\delta$ : 147.3, 132.3, 132.1, 130.2, 129.2, 128.9, 126.5, 126.2, 125.1, 124.2, 123.5, 123.1, 118.4, 118.1, 113.8, 105.8; HRMS  $m/z$  (ESI) calcd for C<sub>20</sub>H<sub>17</sub>N<sub>2</sub>S (M+H)<sup>+</sup> 317.1107, found 317.1105.

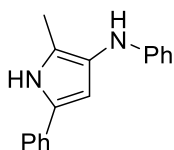

**2-Methyl-N,5-diphenyl-1H-pyrrol-3-amine (3ai):**

Light yellow solid, 50.6 mg, 68% yield; mp 147-148 °C (uncorrected); <sup>1</sup>H NMR (400 MHz, CDCl<sub>3</sub>)  $\delta$ : 8.03 (s, 1H), 7.41 (d,  $J$  = 7.6 Hz, 2H), 7.34 (t,  $J$  = 8.0 Hz, 2H),

7.19-7.14 (m, 3H), 6.70 (d,  $J = 8.4$  Hz, 3H), 6.37 (d,  $J = 3.2$  Hz, 1H), 4.97 (s, 1H), 2.19 (s, 3H);  $^{13}\text{C}$  NMR (100 MHz,  $\text{CDCl}_3$ )  $\delta$ : 148.1, 132.6, 129.1, 128.9, 128.6, 125.8, 123.9, 123.3, 123.1, 117.5, 113.2, 104.8, 10.5; HRMS  $m/z$  (ESI) calcd for  $\text{C}_{17}\text{H}_{17}\text{N}_2$  ( $\text{M}+\text{H}$ ) $^+$  249.1386, found 249.1381.

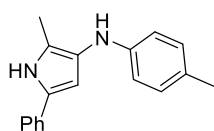

**2-Methyl-5-phenyl-*N*-*p*-tolyl-1*H*-pyrrol-3-amine (3aj):** Light yellow solid, 51.9 mg, 66% yield; mp 176-177 °C (uncorrected);

$^1\text{H}$  NMR (400 MHz,  $\text{CDCl}_3$ )  $\delta$ : 8.00 (s, 1H), 7.40 (d,  $J = 7.2$  Hz, 2H), 7.33 (t,  $J = 7.6$  Hz, 2H), 7.16 (t,  $J = 7.2$  Hz, 1H), 6.97 (d,  $J = 8.4$  Hz, 2H), 6.62 (d,  $J = 8.4$  Hz, 2H), 6.36 (d,  $J = 2.8$  Hz, 1H), 4.86 (s, 1H), 2.24 (s, 3H), 2.19 (s, 3H);  $^{13}\text{C}$  NMR (100 MHz,  $\text{CDCl}_3$ )  $\delta$ : 145.8, 132.7, 129.6, 128.8, 128.5, 126.7, 125.8, 123.9, 123.7, 123.1, 113.3, 104.7, 20.4, 10.5; HRMS  $m/z$  (ESI) calcd for  $\text{C}_{18}\text{H}_{19}\text{N}_2$  ( $\text{M}+\text{H}$ ) $^+$  263.1543, found 263.1549.

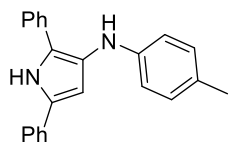

**2,5-Diphenyl-*N*-*p*-tolyl-1*H*-pyrrol-3-amine (3ak):** Light yellow oil, 73.9 mg, 76% yield;  $^1\text{H}$  NMR (400 MHz,  $\text{CDCl}_3$ )  $\delta$ : 8.28 (s, 1H), 7.57-7.54 (m, 2H), 7.49-7.47 (m, 2H), 7.39-7.33 (m, 4H),

7.23-7.18 (m, 2H), 7.01 (d,  $J = 8.0$  Hz, 2H), 6.76 (d,  $J = 8.4$  Hz, 2H), 6.54 (d,  $J = 3.2$  Hz, 1H), 5.10 (s, 1H), 2.26 (s, 3H);  $^{13}\text{C}$  NMR (100 MHz,  $\text{CDCl}_3$ )  $\delta$ : 144.8, 132.2, 131.9, 130.8, 129.7, 129.0, 128.9, 127.4, 126.5, 126.3, 125.5, 125.2, 125.1, 123.6, 114.2, 105.5, 20.4; HRMS  $m/z$  (ESI) calcd for  $\text{C}_{23}\text{H}_{21}\text{N}_2$  ( $\text{M}+\text{H}$ ) $^+$  325.1699, found 325.1702.

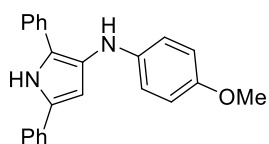

***N*-(4-Methoxyphenyl)-2,5-diphenyl-1*H*-pyrrol-3-amine**

**(3al):** Light yellow oil, 73.4 mg, 72% yield;  $^1\text{H}$  NMR (400 MHz,  $\text{CDCl}_3$ )  $\delta$ : 8.28 (s, 1H), 7.55 (d,  $J = 7.6$  Hz, 2H), 7.48 (d,  $J = 7.6$  Hz, 2H), 7.39-7.34 (m, 4H), 7.24-7.18 (m, 2H), 6.82-6.78 (m, 4H), 6.51 (d,  $J = 2.8$  Hz, 1H), 5.03 (s, 1H), 3.75 (s, 3H);  $^{13}\text{C}$  NMR (100 MHz,  $\text{CDCl}_3$ )  $\delta$ : 152.7, 141.0, 132.2, 132.0, 130.9, 129.0, 128.9, 126.5, 126.4, 126.2, 125.1, 124.6, 123.6, 115.6, 114.8, 105.0, 55.8; HRMS  $m/z$  (ESI) calcd for  $\text{C}_{23}\text{H}_{21}\text{N}_2\text{O}$  ( $\text{M}+\text{H}$ ) $^+$  341.1648, found 341.1654.

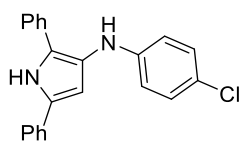

***N*-(4-Chlorophenyl)-2,5-diphenyl-1*H*-pyrrol-3-amine (3am):**

Light yellow oil, 86.7 mg, 84% yield;  $^1\text{H}$  NMR (400 MHz,  $\text{CDCl}_3$ )  $\delta$ : 8.31 (s, 1H), 7.52-7.47 (m, 4H), 7.40-7.33 (m, 4H), 7.25-7.20 (m, 2H), 7.14-7.10 (m, 2H), 6.74-6.70 (m, 2H), 6.50 (d,  $J = 2.8$  Hz, 1H), 5.16 (s, 1H);  $^{13}\text{C}$  NMR (100 MHz,  $\text{CDCl}_3$ )  $\delta$ : 145.9, 132.0, 131.6, 131.0, 129.1, 129.0 (2C), 126.7, 126.6, 125.8, 125.2, 124.3, 123.6, 122.6, 115.0, 105.7; HRMS  $m/z$  (ESI) calcd for  $\text{C}_{22}\text{H}_{18}\text{ClN}_2$  ( $\text{M}+\text{H}$ ) $^+$  345.1153, found 345.1156.

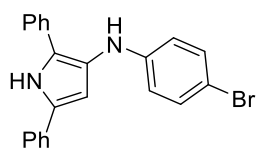

***N*-(4-Bromophenyl)-2,5-diphenyl-1*H*-pyrrol-3-amine (3an):**

Light yellow oil, 93.1 mg, 80% yield;  $^1\text{H}$  NMR (400 MHz,  $\text{CDCl}_3$ )  $\delta$ : 8.34 (s, 1H), 7.51-7.47 (m, 4H), 7.39-7.33 (m, 4H), 7.26-7.19 (m, 4H), 6.69-6.65 (m, 2H), 6.49 (d,  $J = 2.8$  Hz, 1H), 5.17 (s, 1H);  $^{13}\text{C}$  NMR (100 MHz,  $\text{CDCl}_3$ )  $\delta$ : 146.4, 132.0, 131.9, 131.6, 131.0, 129.0, 126.7, 126.6, 125.9, 125.2, 124.1, 123.6, 115.4, 109.7, 105.7; HRMS  $m/z$  (ESI) calcd for  $\text{C}_{22}\text{H}_{18}\text{BrN}_2$  ( $\text{M}+\text{H}$ ) $^+$  389.0648, found 389.0654.

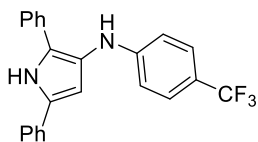

**2,5-Diphenyl-N-(4-(trifluoromethyl)phenyl)-1H-pyrrol-3-amine**

**mine (3ao):** Light yellow solid, 99.8 mg, 88% yield; mp 139-140 °C (uncorrected); <sup>1</sup>H NMR (400 MHz, CDCl<sub>3</sub>) δ: 8.33 (s, 1H), 7.50-7.47 (m, 4H), 7.41-7.33 (m, 6H), 7.26-7.21 (m, 2H), 6.80 (d, *J* = 8.4 Hz, 2H), 6.50 (d, *J* = 2.8 Hz, 1H), 5.38 (s, 1H); <sup>13</sup>C NMR (100 MHz, CDCl<sub>3</sub>) δ: 150.0, 131.9, 131.4, 131.1, 129.0, 126.8 (2C), 126.6 (q, *J* = 3.7 Hz), 126.4, 126.3, 125.3, 123.6, 123.0, 119.6 (q, *J* = 32.4 Hz), 113.0, 105.9; <sup>19</sup>F NMR (376 MHz, CDCl<sub>3</sub>) δ: -60.9 (m, 3F); HRMS *m/z* (ESI) calcd for C<sub>23</sub>H<sub>18</sub>F<sub>3</sub>N<sub>2</sub> (M+H)<sup>+</sup> 379.1417, found 379.1423.

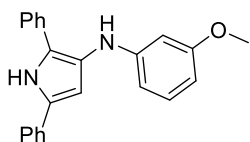

**N-(3-Methoxyphenyl)-2,5-diphenyl-1H-pyrrol-3-amine**

**(3ap):** Light yellow oil, 72.4 mg, 71% yield; <sup>1</sup>H NMR (400 MHz, CDCl<sub>3</sub>) δ: 8.30 (s, 1H), 7.56-7.46 (m, 4H), 7.38-7.32 (m, 4H), 7.21 (t, *J* = 7.6 Hz, 2H), 7.13-7.07 (m, 1H), 6.56-6.54 (m, 1H), 6.46-6.32 (m, 3H), 5.18 (s, 1H), 3.71 (s, 3H); <sup>13</sup>C NMR (100 MHz, CDCl<sub>3</sub>) δ: 160.8, 148.7, 132.1, 131.8, 130.9, 130.0, 128.9, 126.5, 126.4, 125.6, 125.3, 124.5, 123.6, 106.9, 105.9, 103.4, 99.8, 55.1; HRMS *m/z* (ESI) calcd for C<sub>23</sub>H<sub>21</sub>N<sub>2</sub>O (M+H)<sup>+</sup> 341.1648, found 341.1656.

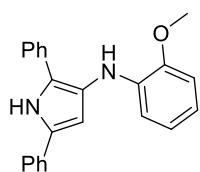

**N-(2-Methoxyphenyl)-2,5-diphenyl-1H-pyrrol-3-amine (3aq):**

Light yellow oil, 70.4 mg, 69% yield; <sup>1</sup>H NMR (400 MHz, CDCl<sub>3</sub>) δ: 8.32 (s, 1H), 7.57 (d, *J* = 8.0 Hz, 2H), 7.49 (d, *J* = 8.0 Hz, 2H), 7.39-7.32 (m, 4H), 7.23-7.17 (m, 2H), 6.91 (d, *J* = 8.0 Hz, 1H), 6.86-6.79 (m, 2H), 6.72 (t, *J* = 7.6 Hz, 1H), 6.58 (d, *J* = 2.8 Hz, 1H), 5.81 (s, 1H), 3.88 (s, 3H); <sup>13</sup>C NMR (100 MHz, CDCl<sub>3</sub>) δ: 146.9, 136.9, 132.2, 132.0, 130.8, 128.9 (2C), 126.5, 126.2,

125.4, 125.0, 124.8, 123.6, 121.2, 117.3, 112.1, 109.9, 105.7, 55.5; HRMS  $m/z$  (ESI) calcd for  $C_{23}H_{21}N_2O$  (M+H)<sup>+</sup> 341.1648, found 341.1654.

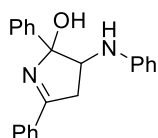

**2,5-Diphenyl-3-(phenylamino)-3,4-dihydro-2H-pyrrol-2-ol (4aa):**

Light yellow oil, 68.9 mg, 70% yield; <sup>1</sup>H NMR (400 MHz, CDCl<sub>3</sub>) δ:

7.89 (d,  $J = 7.2$  Hz, 2H), 7.54-7.41 (m, 5H), 7.22-7.13 (m, 5H), 6.70 (t,  $J = 7.6$  Hz, 1H), 6.58 (d,  $J = 8.0$  Hz, 2H), 5.96 (s, 1H), 4.83 (d,  $J = 6.4$  Hz, 1H), 4.06 (q,  $J = 6.4$  Hz, 1H), 3.42 (dd,  $J = 16.8, 6.8$  Hz, 1H), 2.98 (dd,  $J = 17.2, 4.4$  Hz, 1H); <sup>13</sup>C NMR (100 MHz, CDCl<sub>3</sub>) δ: 174.9, 147.2, 144.3, 133.4, 131.7, 129.2, 128.6, 128.24, 128.17, 127.7, 125.2, 117.5, 113.3, 100.7, 61.2, 42.1. HRMS  $m/z$  (ESI) calcd for  $C_{22}H_{21}N_2O$  (M+H)<sup>+</sup> 329.1648, found 329.1652.

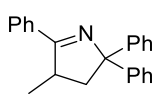

**4-Methyl-2,2,5-triphenyl-3,4-dihydro-2H-pyrrole (7):**<sup>5</sup> Light yellow

oil, 16.8 mg, 18% yield; <sup>1</sup>H NMR (400 MHz, CDCl<sub>3</sub>) δ: 7.92 (t,  $J = 2.8$

Hz, 2H), 7.56 (d,  $J = 6.4$  Hz, 2H), 7.45-7.44 (m, 5H), 7.30 (t,  $J = 6.0$  Hz, 2H), 7.25 (t,  $J = 6.0$  Hz, 2H), 7.20-7.13 (m, 2H), 3.60-3.53 (m, 1H), 3.04 (dd,  $J = 10.4, 6.8$  Hz, 1H), 2.49 (dd,  $J = 10.4, 4.0$  Hz, 1H), 1.11 (d,  $J = 6.0$  Hz, 3H); <sup>13</sup>C NMR (100 MHz, CDCl<sub>3</sub>) δ: 175.4, 149.0, 148.3, 134.2, 130.1, 128.4, 128.3, 128.12, 128.09, 126.6, 126.5, 126.22, 126.20, 82.0, 46.4, 42.8, 18.5.

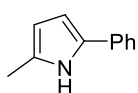

**2-Methyl-5-phenyl-1H-pyrrole (8):**<sup>6</sup> White solid, 21.2 mg, 45% yield;

<sup>1</sup>H NMR (400 MHz, CDCl<sub>3</sub>) δ: 8.07 (s, 1H), 7.40 (d,  $J = 6.0$  Hz, 2H),

7.31 (t,  $J = 6.0$  Hz, 2H), 7.14 (t,  $J = 6.0$  Hz, 1H), 6.39 (t,  $J = 2.4$  Hz, 1H), 5.94 (brs, 1H), 2.30 (s, 3H); <sup>13</sup>C NMR (100 MHz, CDCl<sub>3</sub>) δ: 132.9, 130.7, 129.0, 128.8, 125.6, 123.3, 107.9, 106.1, 13.1.

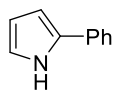

**2-Phenyl-1H-pyrrole (9):**<sup>1c</sup> White solid, 13.7 mg, 32% yield; <sup>1</sup>H NMR (400 MHz, CDCl<sub>3</sub>)  $\delta$ : 8.35 (s, 1H), 7.43 (d,  $J = 6.4$  Hz, 2H), 7.33 (t,  $J = 6.4$  Hz, 2H), 7.19 (t,  $J = 6.4$  Hz, 1H), 6.80 (brs, 1H), 6.52 (brs, 1H), 6.29 (d,  $J = 2.0$  Hz, 1H); <sup>13</sup>C NMR (100 MHz, CDCl<sub>3</sub>)  $\delta$ : 132.7, 132.0, 128.8, 126.1, 123.8, 118.8, 110.0, 105.9.

## (C) NMR Spectra

### *N*,2,5-Triphenyl-1*H*-pyrrol-3-amine (3aa)

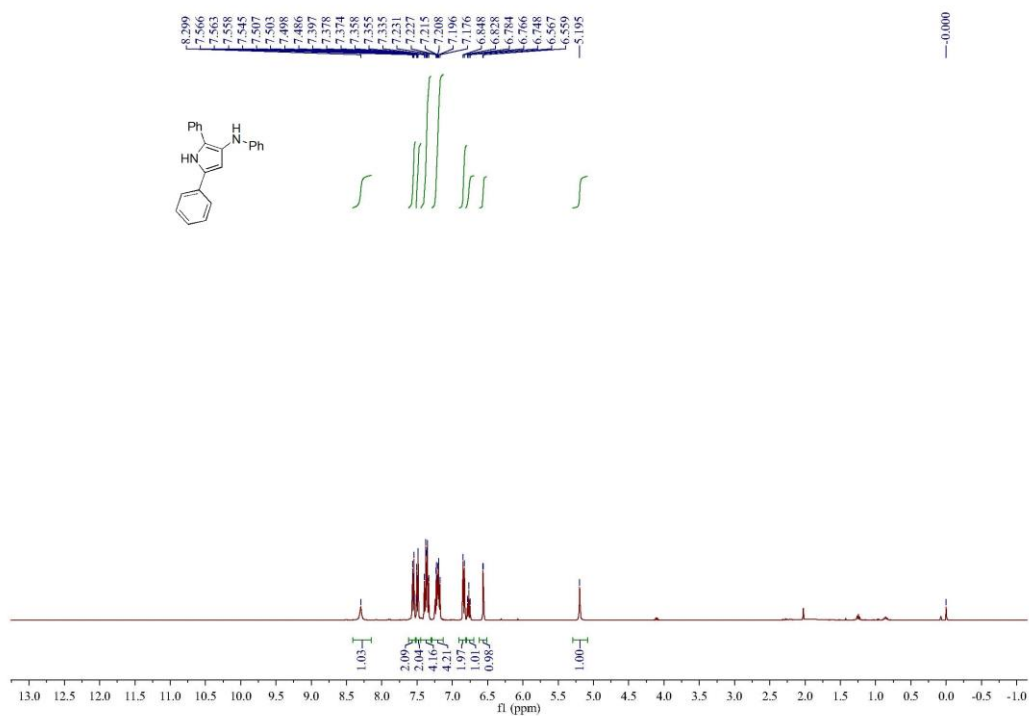

### <sup>1</sup>H NMR spectra of compound 3aa in CDCl<sub>3</sub> (400 MHz)

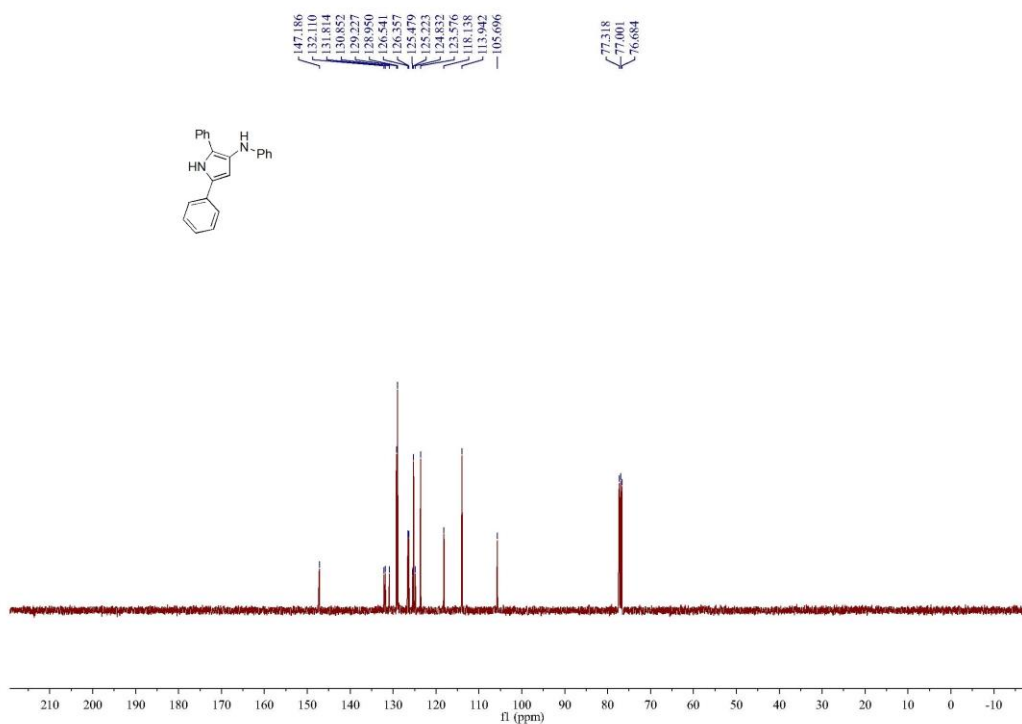

### <sup>13</sup>C NMR spectra of compound 3aa in CDCl<sub>3</sub> (400 MHz)

### *N*,2-Diphenyl-5-*p*-tolyl-1*H*-pyrrol-3-amine (3ba)

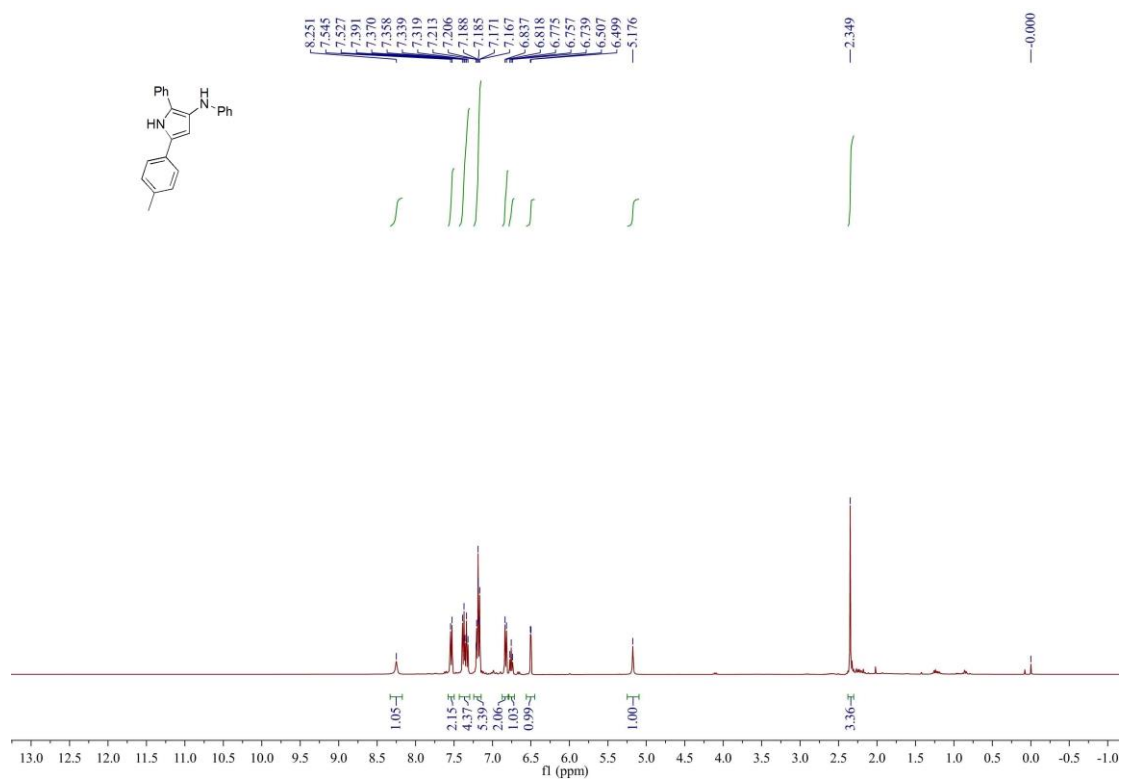

### <sup>1</sup>H spectra of compound 3ba in CDCl<sub>3</sub> (400 MHz)

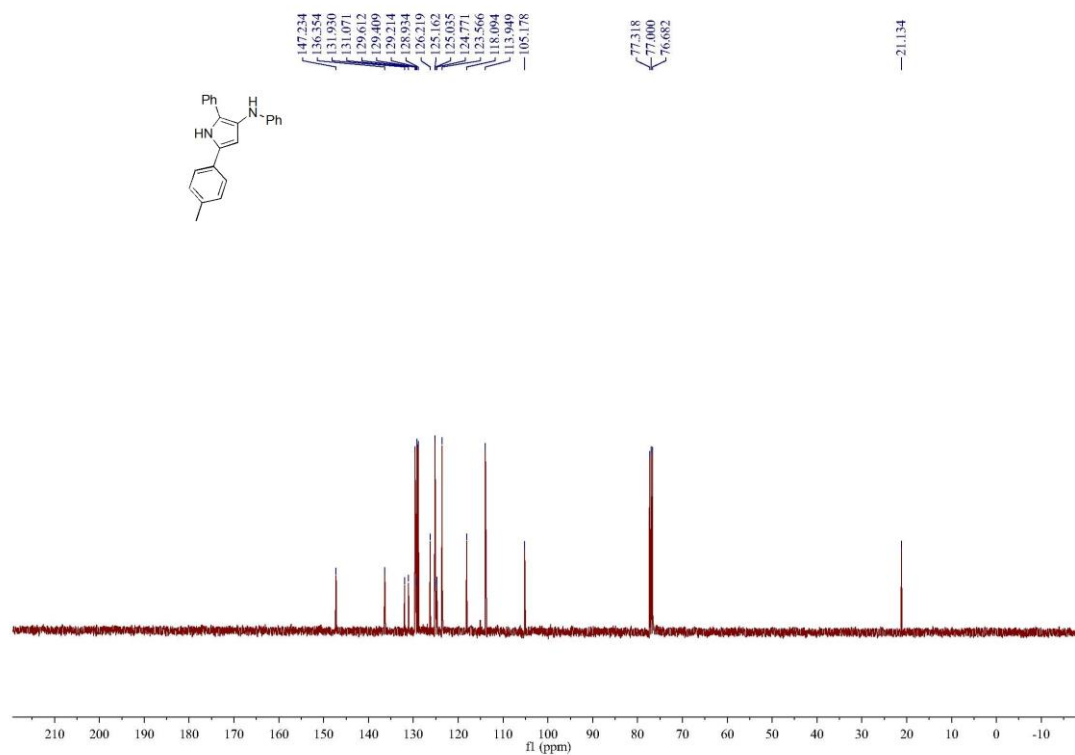

### <sup>13</sup>C NMR spectra of compound 3ba in CDCl<sub>3</sub> (400 MHz)



### 5-(4-Methoxyphenyl)-*N*,2-diphenyl-1*H*-pyrrol-3-amine (3ca)

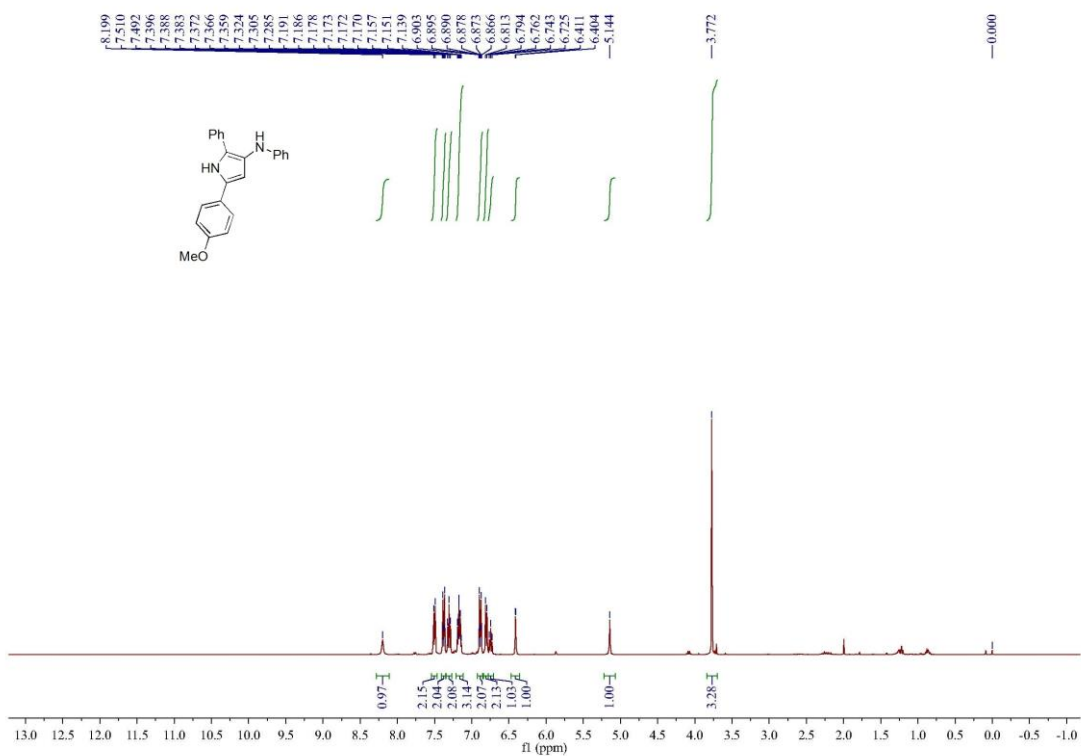

### <sup>1</sup>H NMR spectra of compound 3ca in CDCl<sub>3</sub> (400 MHz)

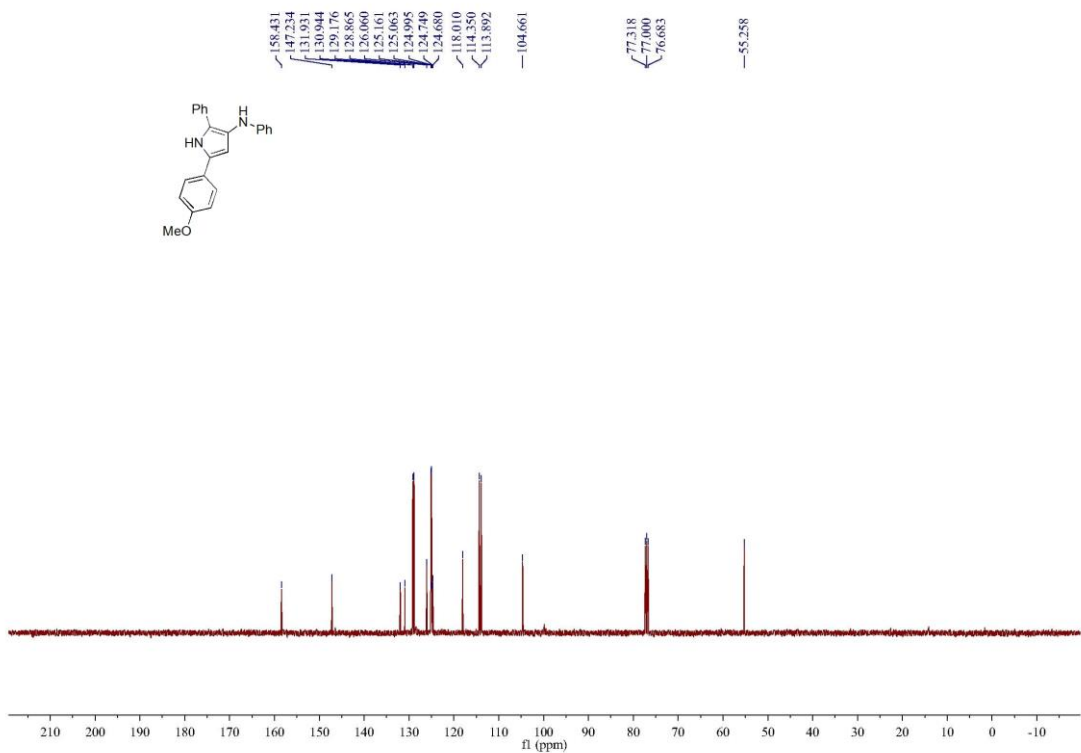

### <sup>13</sup>C NMR spectra of compound 3ca in CDCl<sub>3</sub> (400 MHz)

### 5-(4-Chlorophenyl)-*N*,2-diphenyl-1*H*-pyrrol-3-amine (3da)

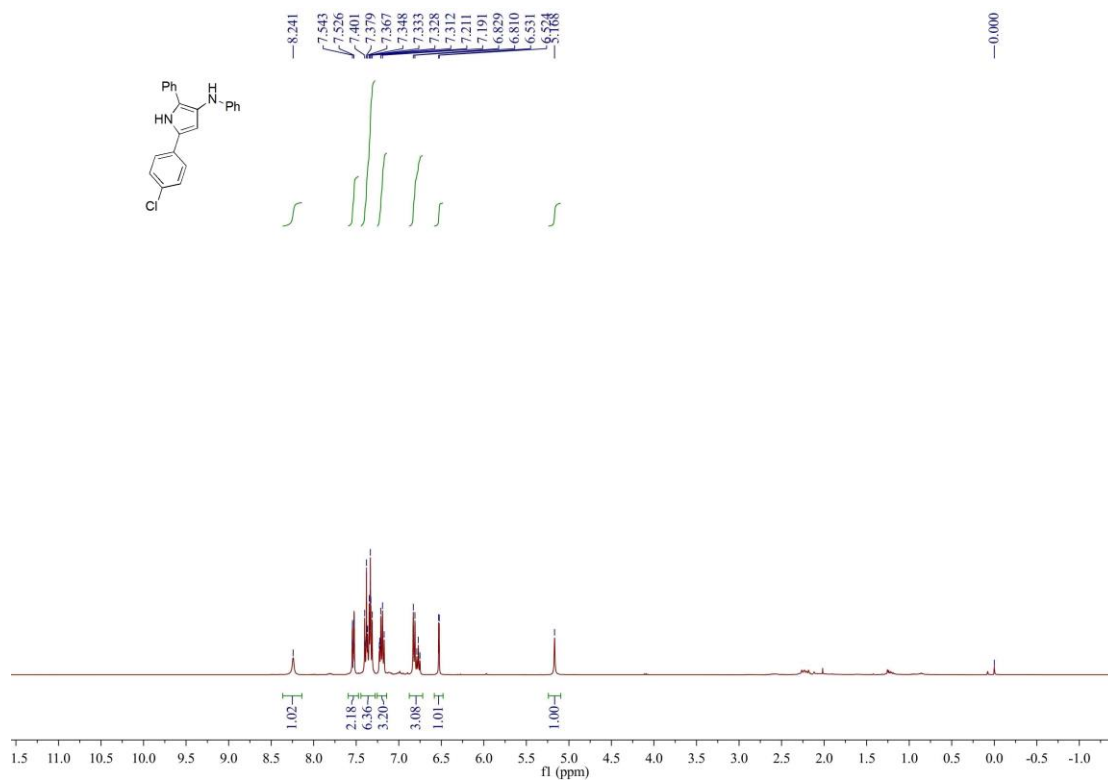

### <sup>1</sup>H NMR spectra of compound 3da in CDCl<sub>3</sub> (400 MHz)

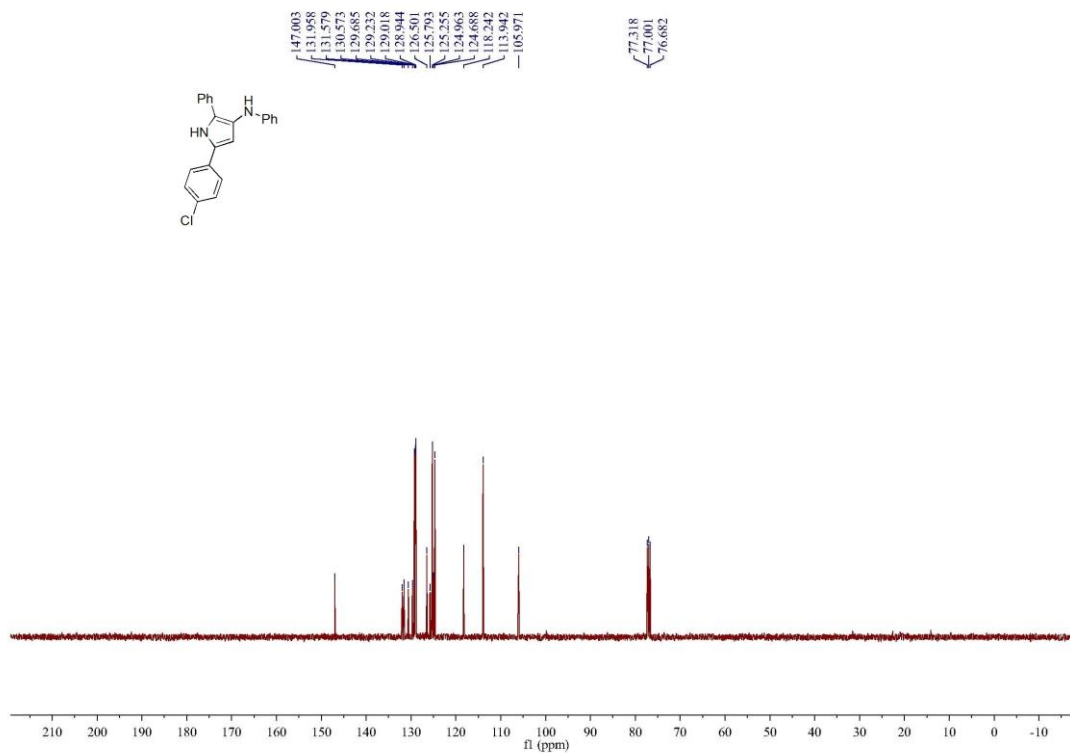

### <sup>13</sup>C NMR spectra of compound 3da in CDCl<sub>3</sub> (400 MHz)

### 5-(4-Bromophenyl)-*N*,2-diphenyl-1*H*-pyrrol-3-amine (3ea)

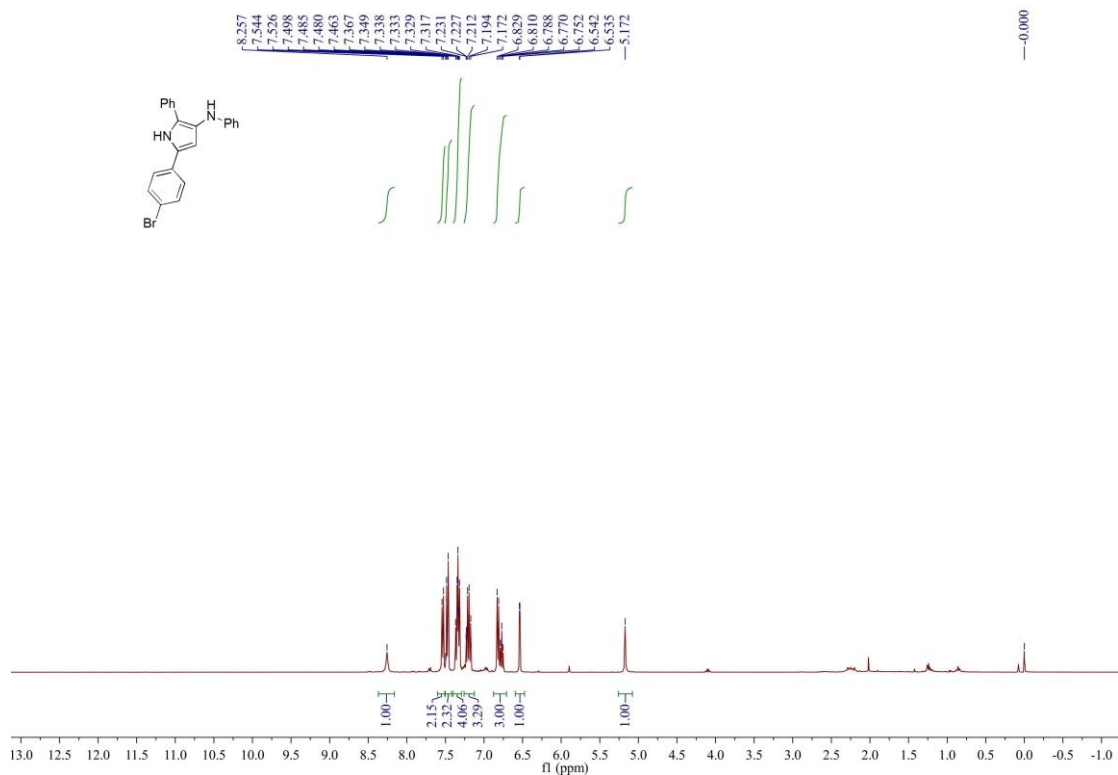

### <sup>1</sup>H NMR spectra of compound 3ea in CDCl<sub>3</sub> (400 MHz)

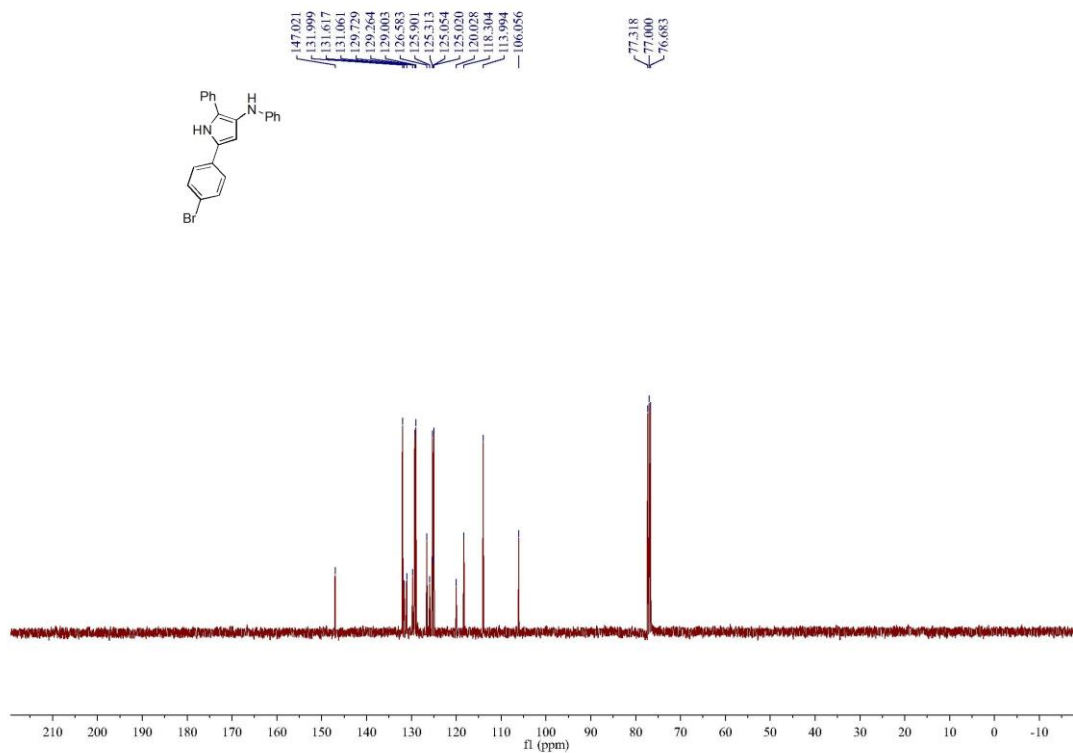

### <sup>13</sup>C NMR spectra of compound 3ea in CDCl<sub>3</sub> (400 MHz)

### 4-(5-Phenyl-4-(phenylamino)-1H-pyrrol-2-yl)benzonitrile (3fa)

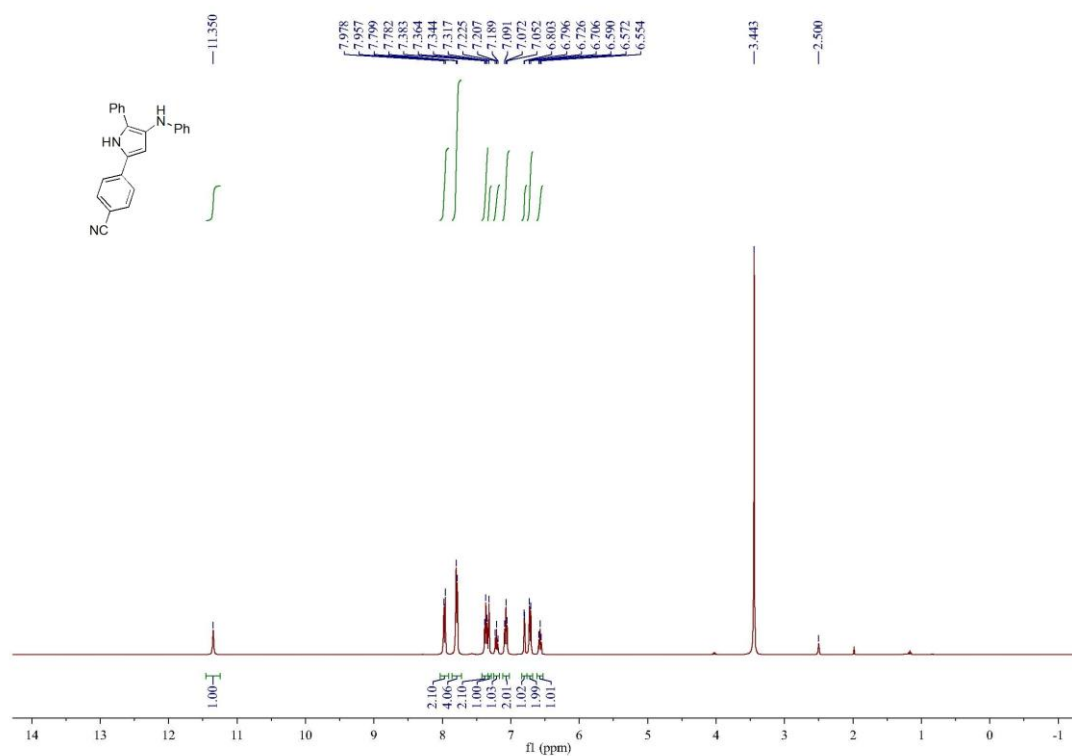

### <sup>1</sup>H NMR spectra of compound 3fa in DMSO-d<sub>6</sub> (400 MHz)

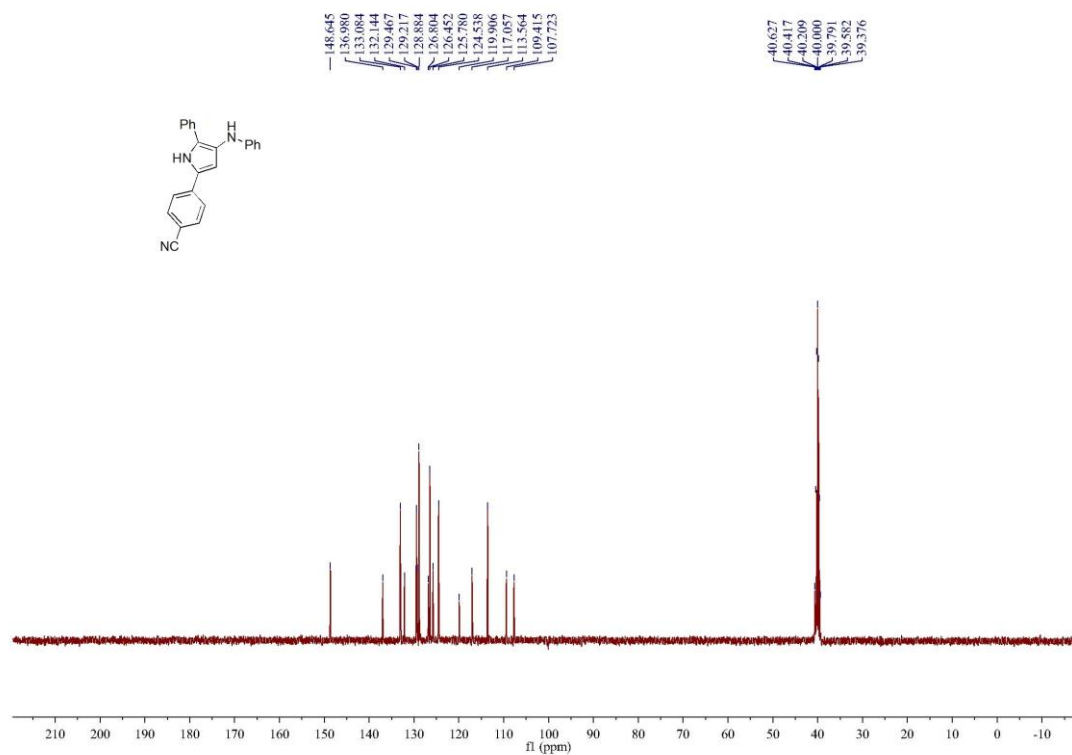

### <sup>13</sup>C NMR spectra of compound 3fa in DMSO-d<sub>6</sub> (400 MHz)

### ***N*,2-diphenyl-5-(*m*-tolyl)-1*H*-pyrrol-3-amine (3ga)**

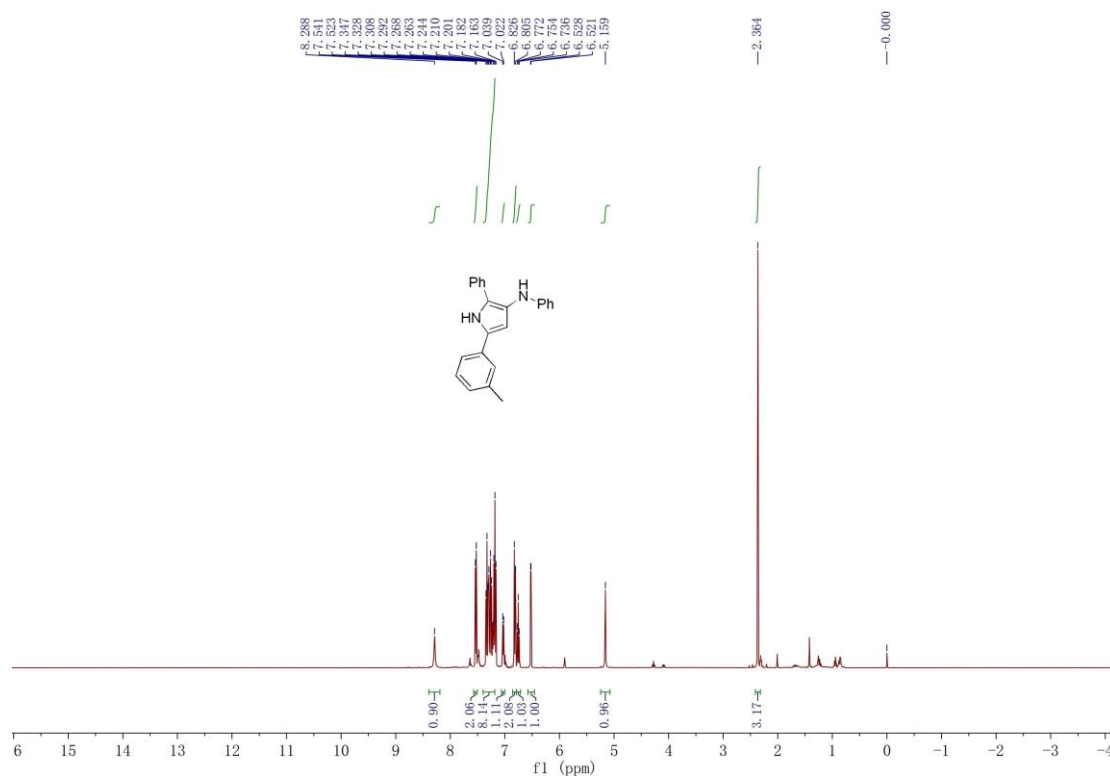

### **<sup>1</sup>H NMR spectra of compound 3ga in CDCl<sub>3</sub> (400 MHz)**

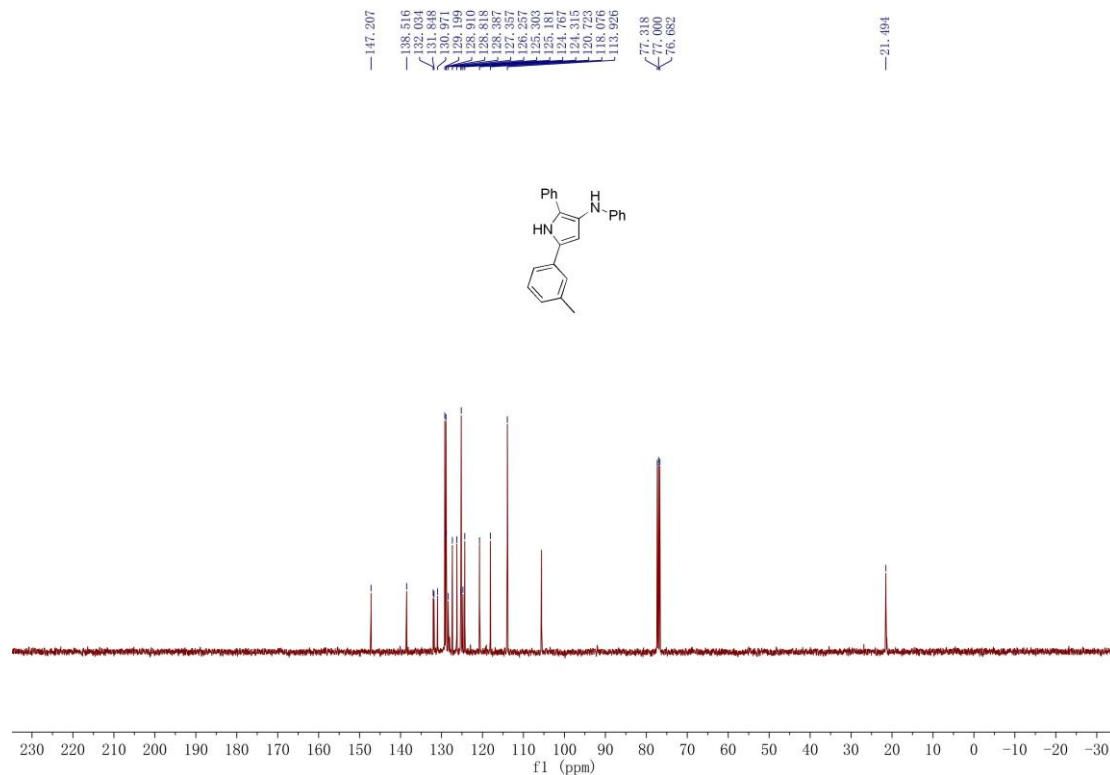

### **<sup>13</sup>C NMR spectra of compound 3ga in CDCl<sub>3</sub> (400 MHz)**

### 5-(3-Nitrophenyl)-*N*,2-diphenyl-1*H*-pyrrol-3-amine (3ha)

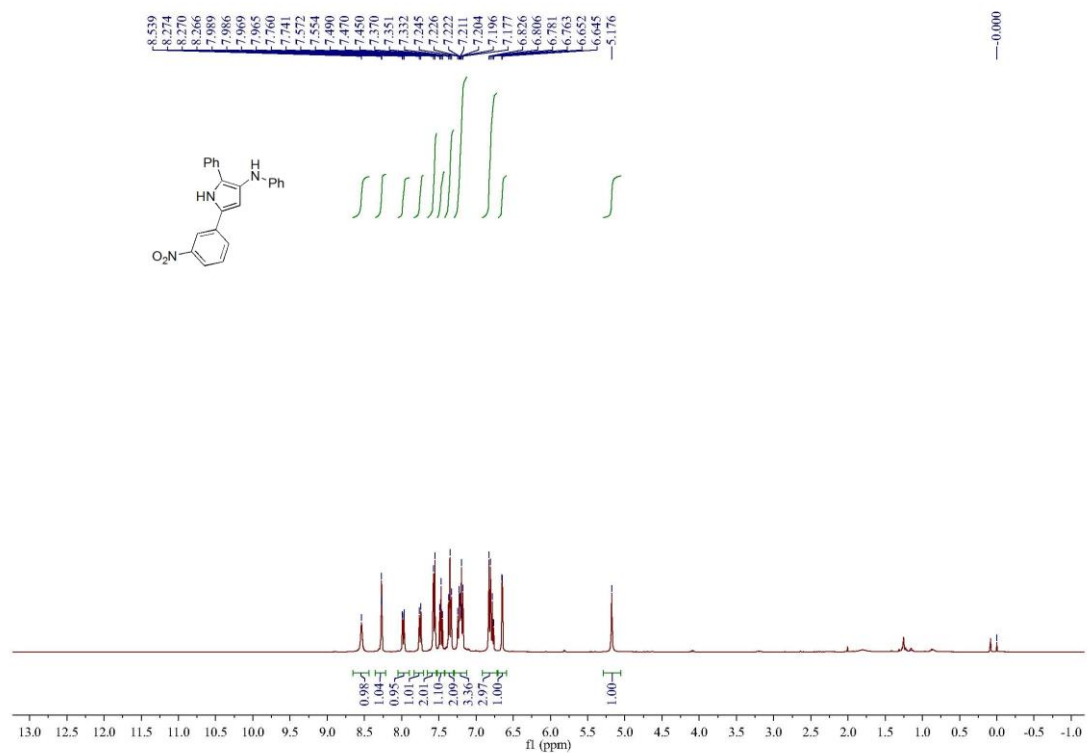

### <sup>1</sup>H NMR spectra of compound 3ha in CDCl<sub>3</sub> (400 MHz)

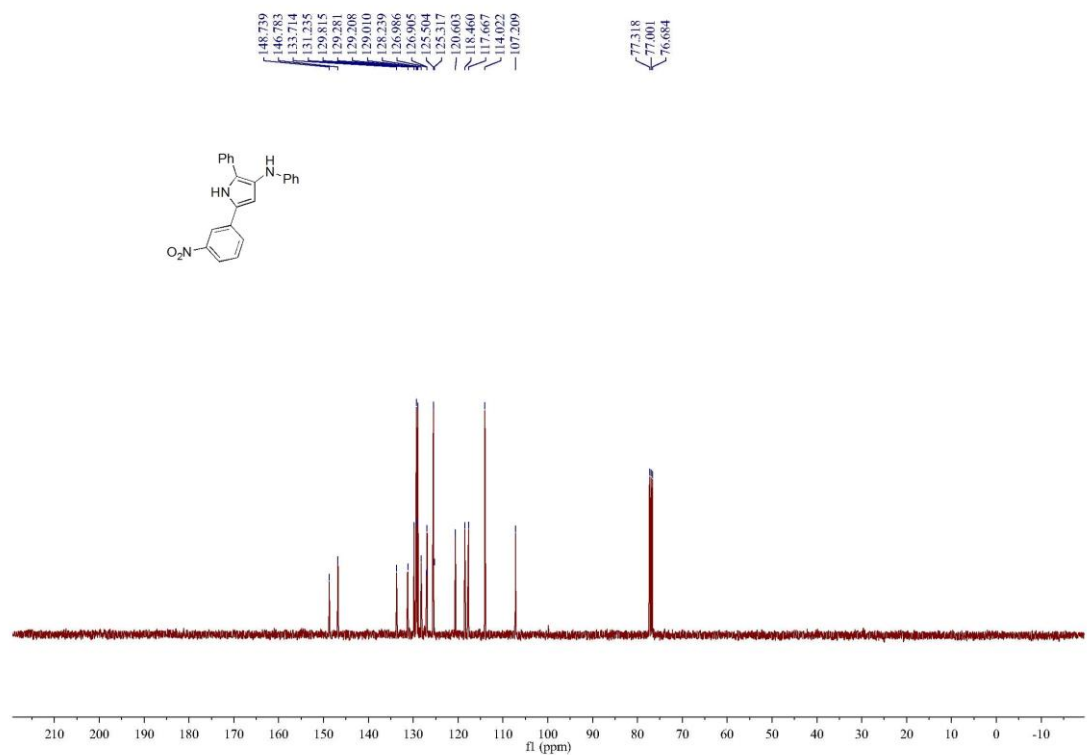

### <sup>13</sup>C NMR spectra of compound 3ha in CDCl<sub>3</sub> (400 MHz)

### *N*,2-diphenyl-5-(*o*-tolyl)-1*H*-pyrrol-3-amine (3ia)

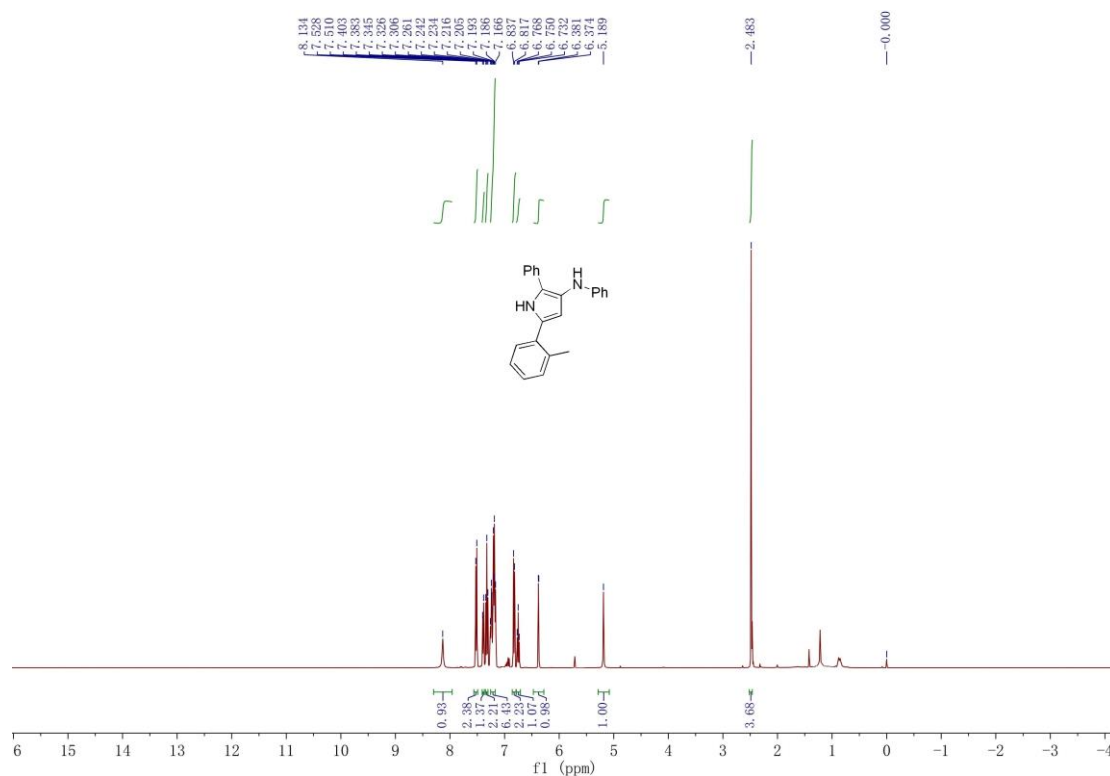

### <sup>1</sup>H NMR spectra of compound 3ia in CDCl<sub>3</sub> (400 MHz)

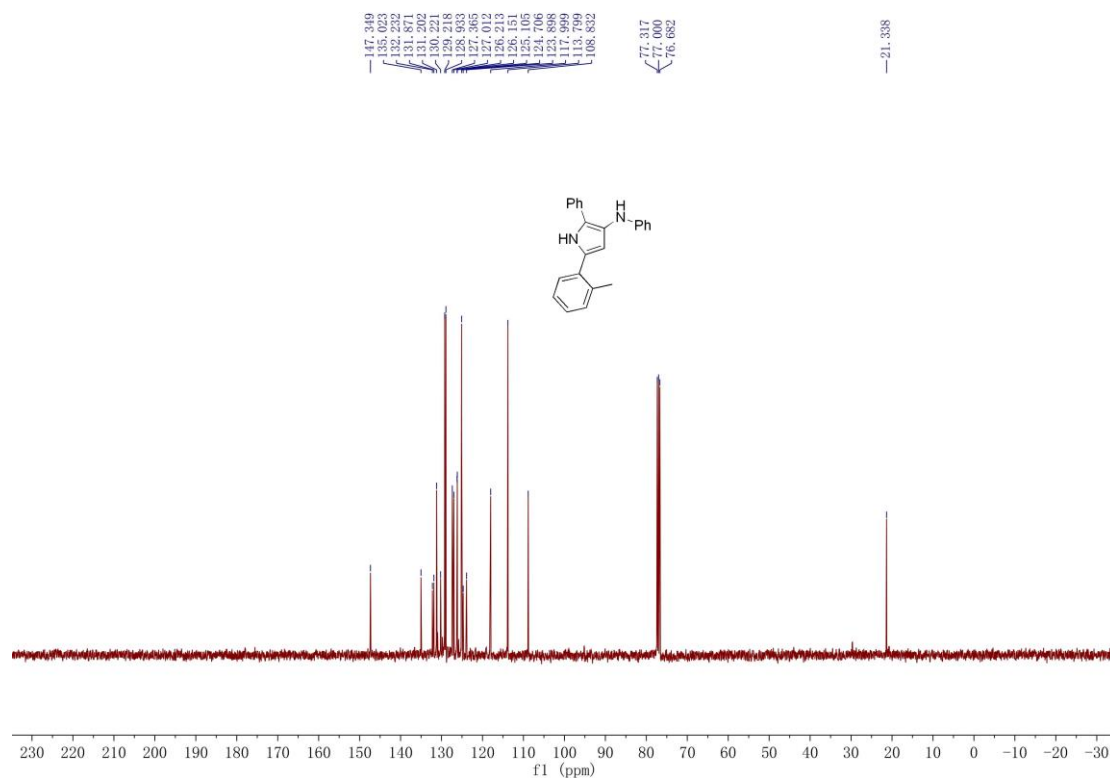

### <sup>13</sup>C NMR spectra of compound 3ia in CDCl<sub>3</sub> (400 MHz)

### 5-(Naphthalen-1-yl)-N,2-diphenyl-1H-pyrrol-3-amine (3ja)

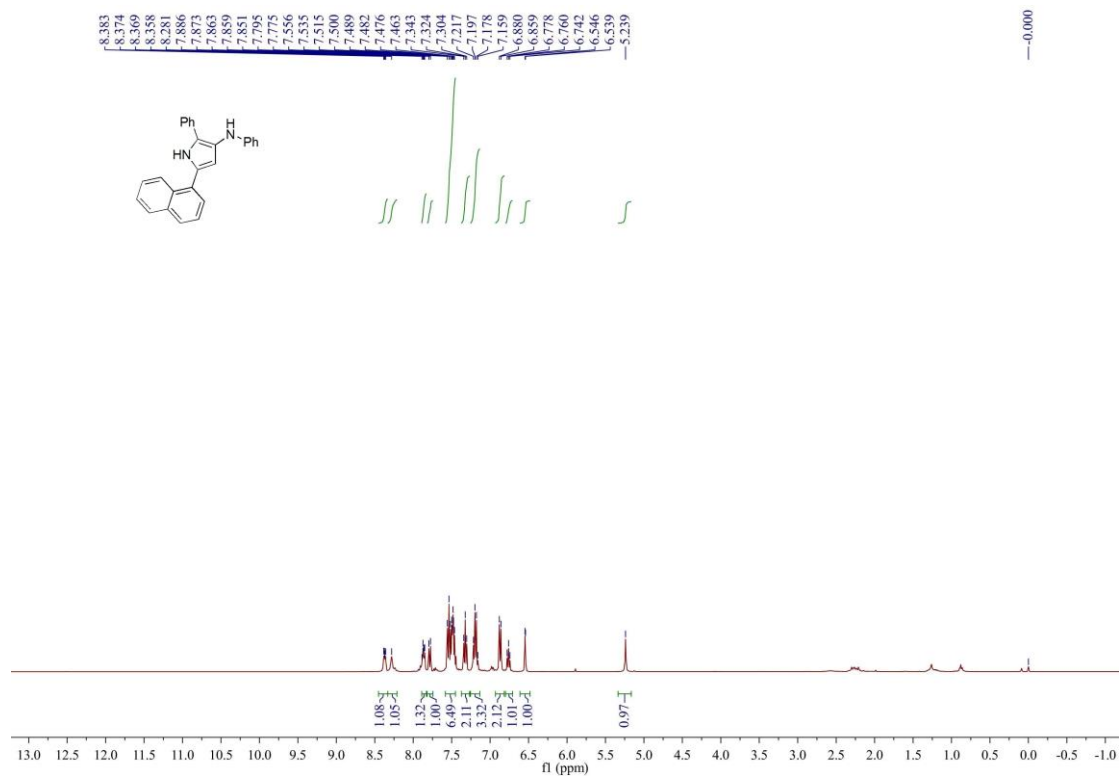

### <sup>1</sup>H NMR spectra of compound 3ja in CDCl<sub>3</sub> (400 MHz)

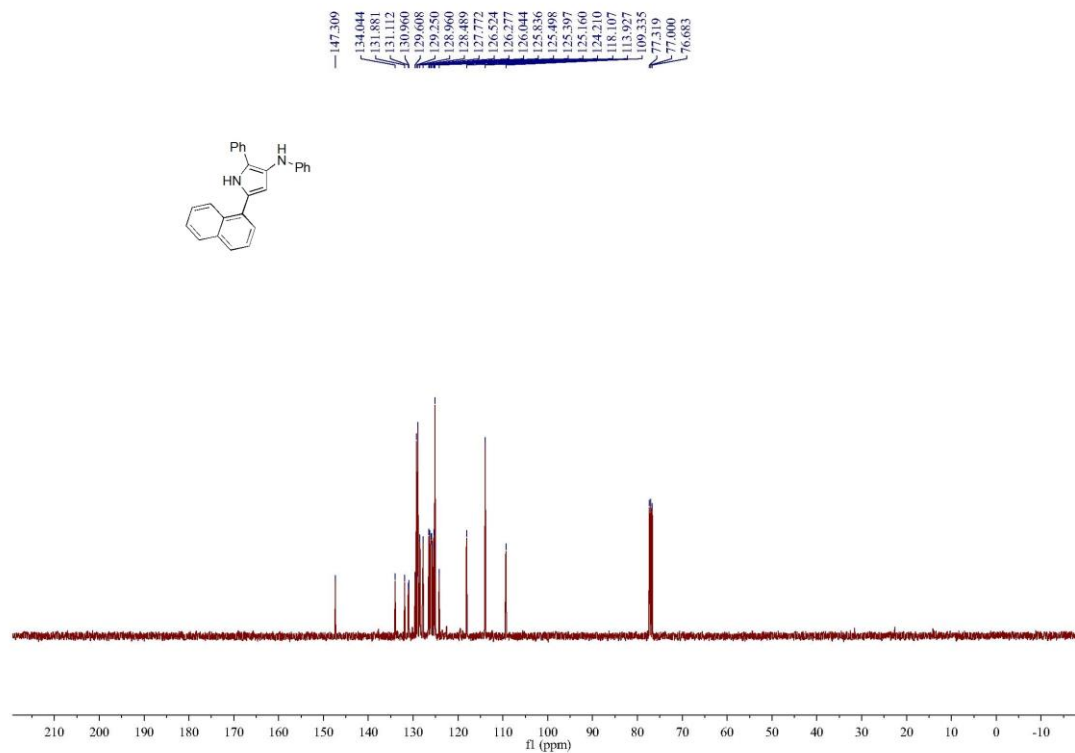

### <sup>13</sup>C NMR spectra of compound 3ja in CDCl<sub>3</sub> (400 MHz)



### 4-Methyl-N,2,5-triphenyl-1H-pyrrol-3-amine (3ka)

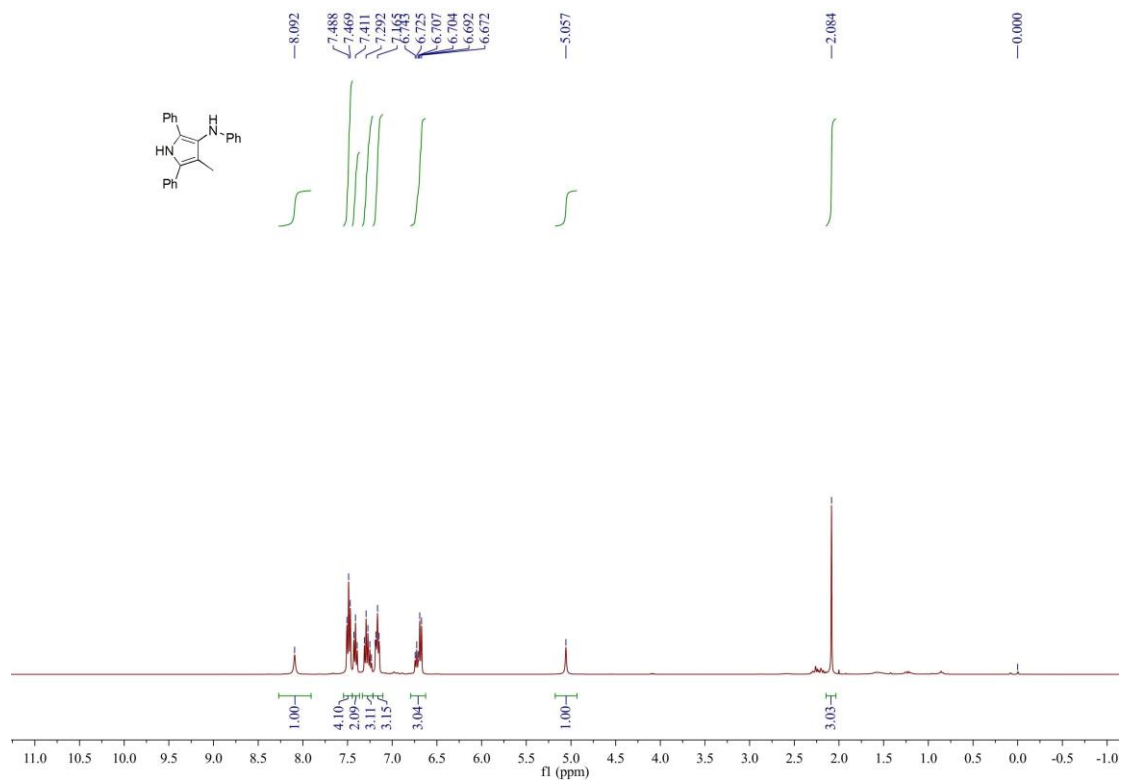

### <sup>1</sup>H NMR spectra of compound 3ka in CDCl<sub>3</sub> (400 MHz)

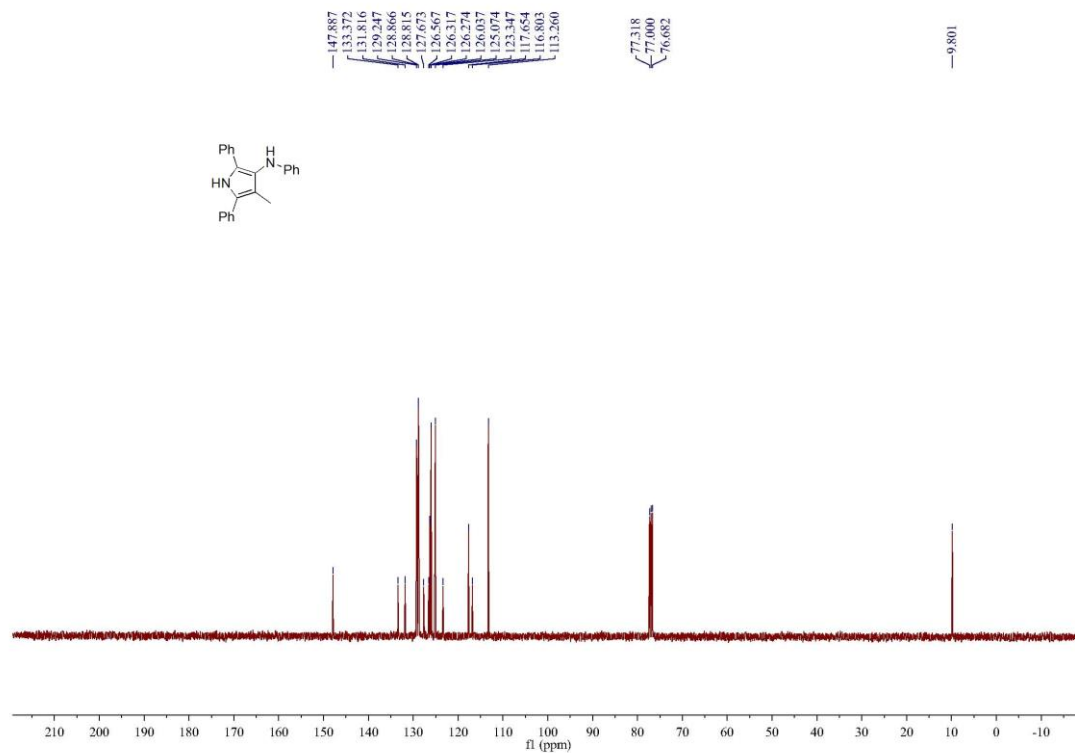

### <sup>13</sup>C NMR spectra of compound 3ka in CDCl<sub>3</sub> (400 MHz)

### *N*,2,4,5-Tetraphenyl-1*H*-pyrrol-3-amine (3la)

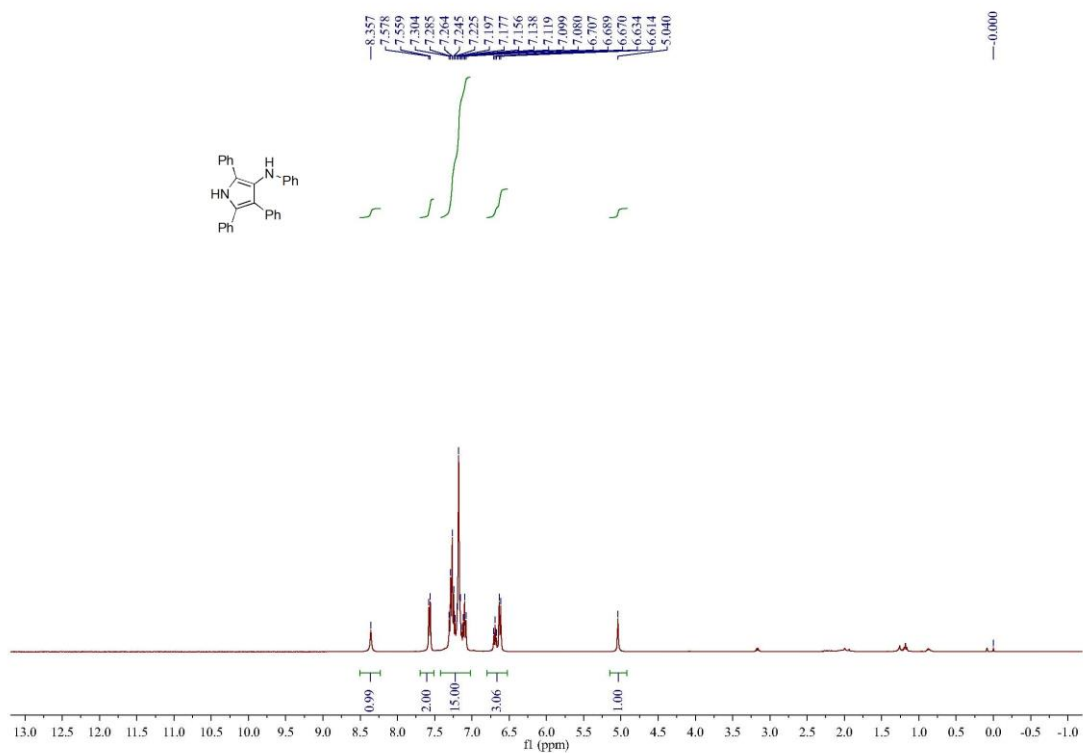

### <sup>1</sup>H NMR spectra of compound 3la in CDCl<sub>3</sub> (400 MHz)

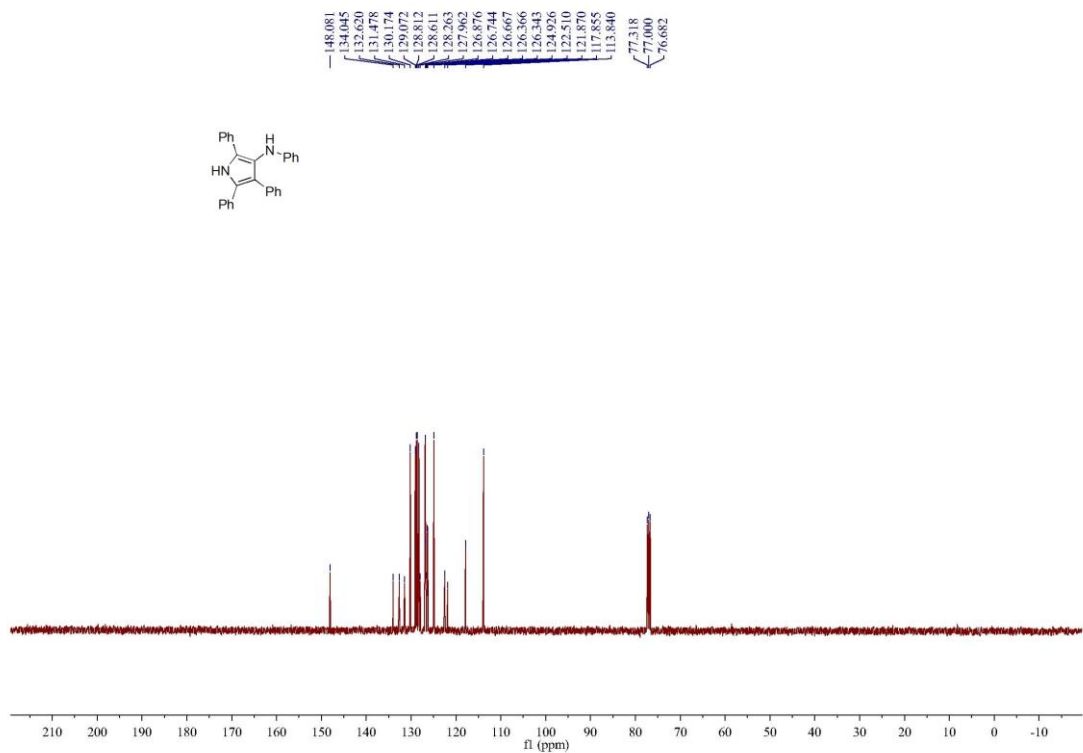

### <sup>13</sup>C NMR spectra of compound 3la in CDCl<sub>3</sub> (400 MHz)

### 4-Methyl-N,2-diphenyl-5-(thiophen-2-yl)-1H-pyrrol-3-amine (3ma)

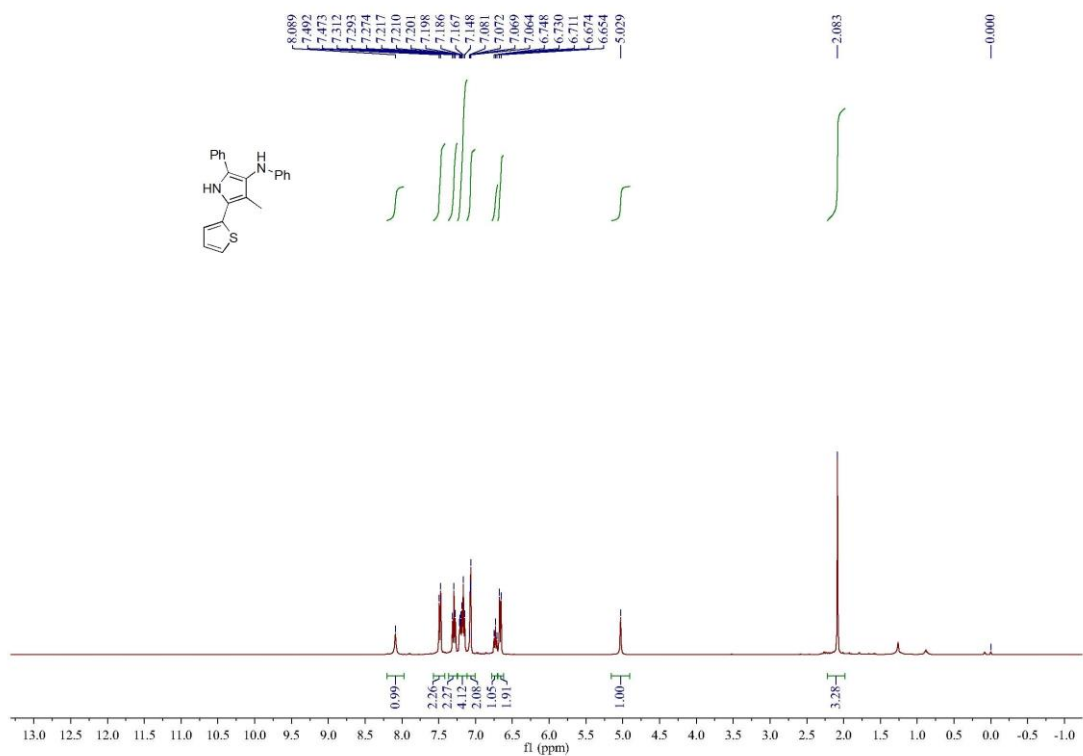

### <sup>1</sup>H NMR spectra of compound 3ma in CDCl<sub>3</sub> (400 MHz)

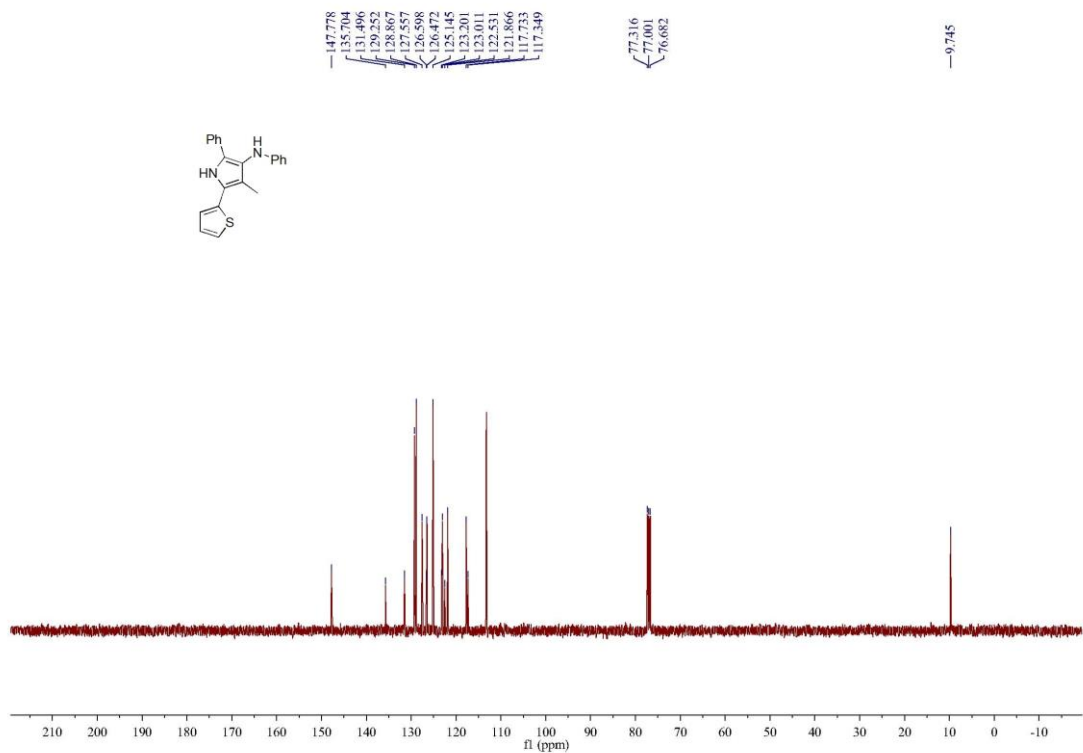

### <sup>13</sup>C NMR spectra of compound 3ma in CDCl<sub>3</sub> (400 MHz)

### 5-(Furan-2-yl)-4-methyl-*N*,2-diphenyl-1*H*-pyrrol-3-amine (3na)

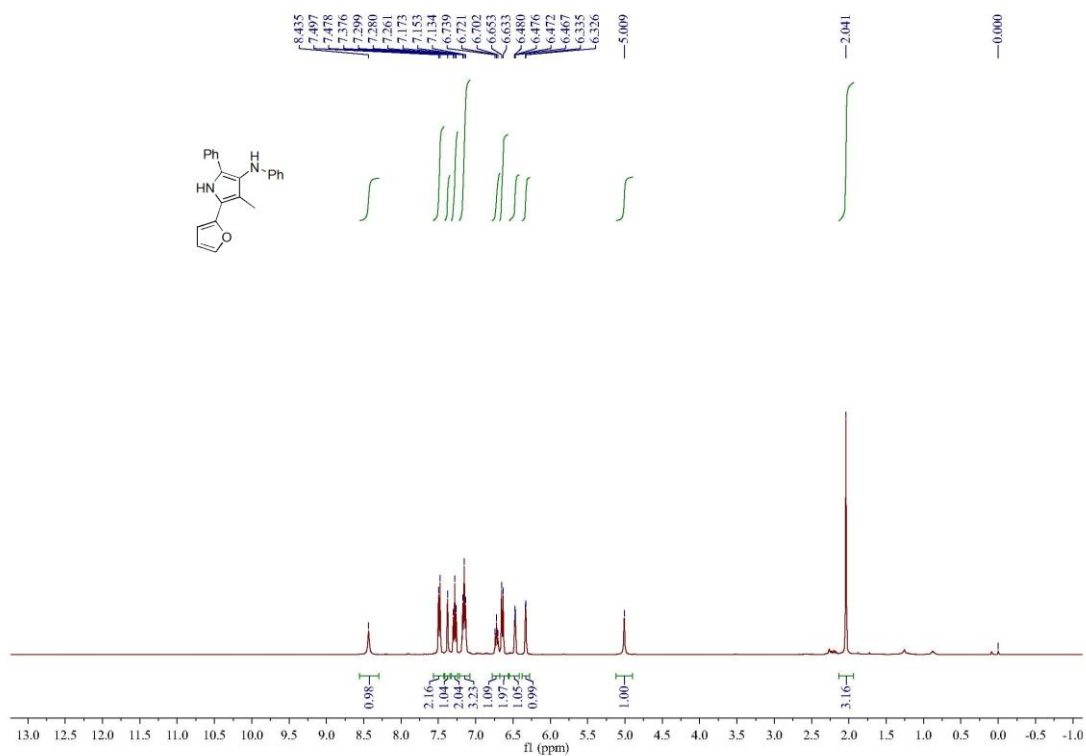

### <sup>13</sup>C NMR spectra of compound 3na in CDCl<sub>3</sub> (400 MHz)

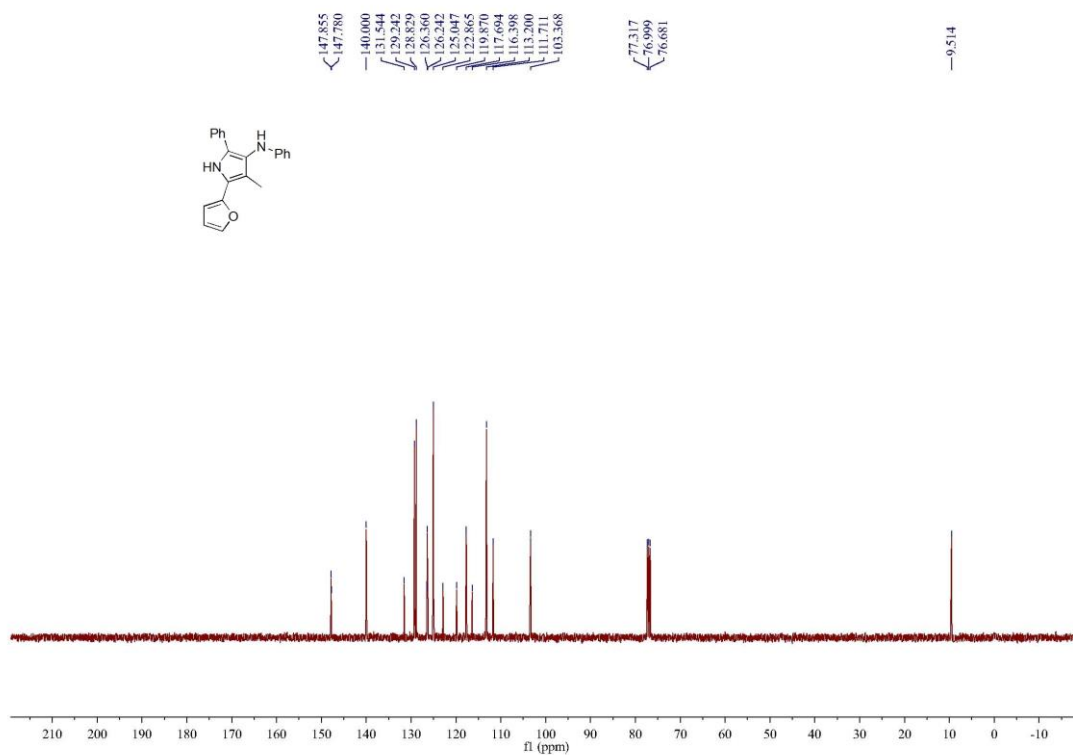

### <sup>13</sup>C NMR spectra of compound 3na in CDCl<sub>3</sub> (400 MHz)

### *N*,2-Diphenyl-4,5-dihydro-1*H*-benzo[*g*]indol-3-amine (3oa)

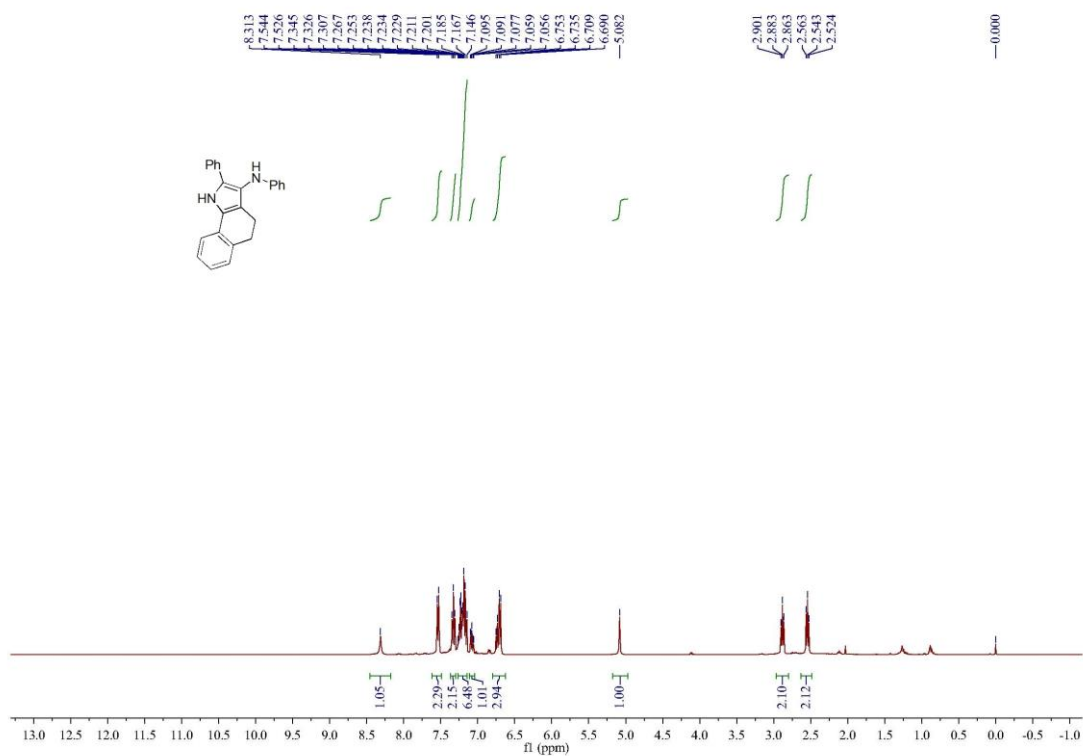

### <sup>1</sup>H NMR spectra of compound 3oa in CDCl<sub>3</sub> (400 MHz)

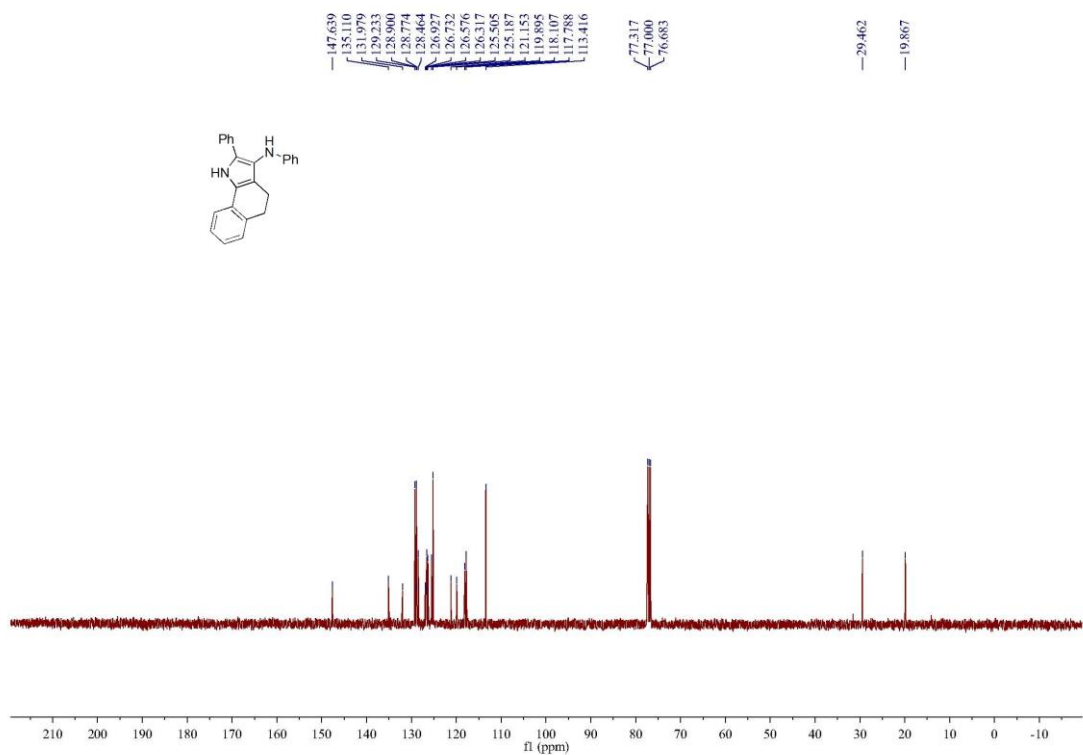

### <sup>13</sup>C NMR spectra of compound 3oa in CDCl<sub>3</sub> (400 MHz)

## *N*,2-Diphenyl-1,4-dihydrochromeno[4,3-*b*]pyrrol-3-amine (3pa)

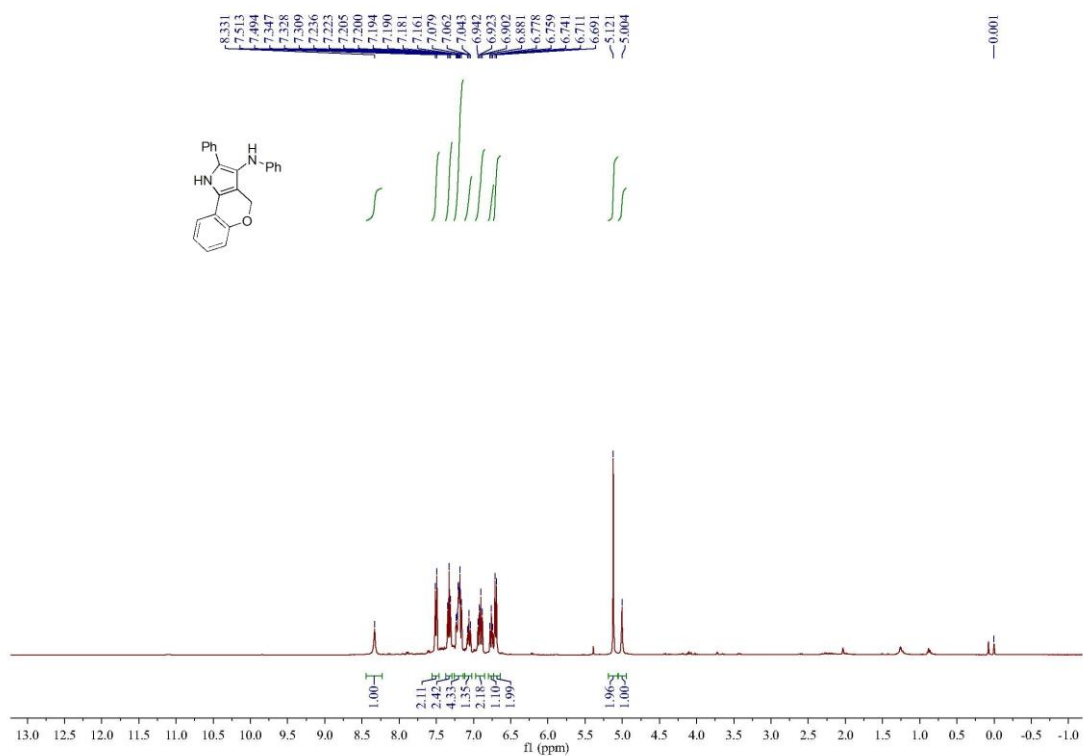

## <sup>1</sup>H NMR spectra of compound 3pa in CDCl<sub>3</sub> (400 MHz)

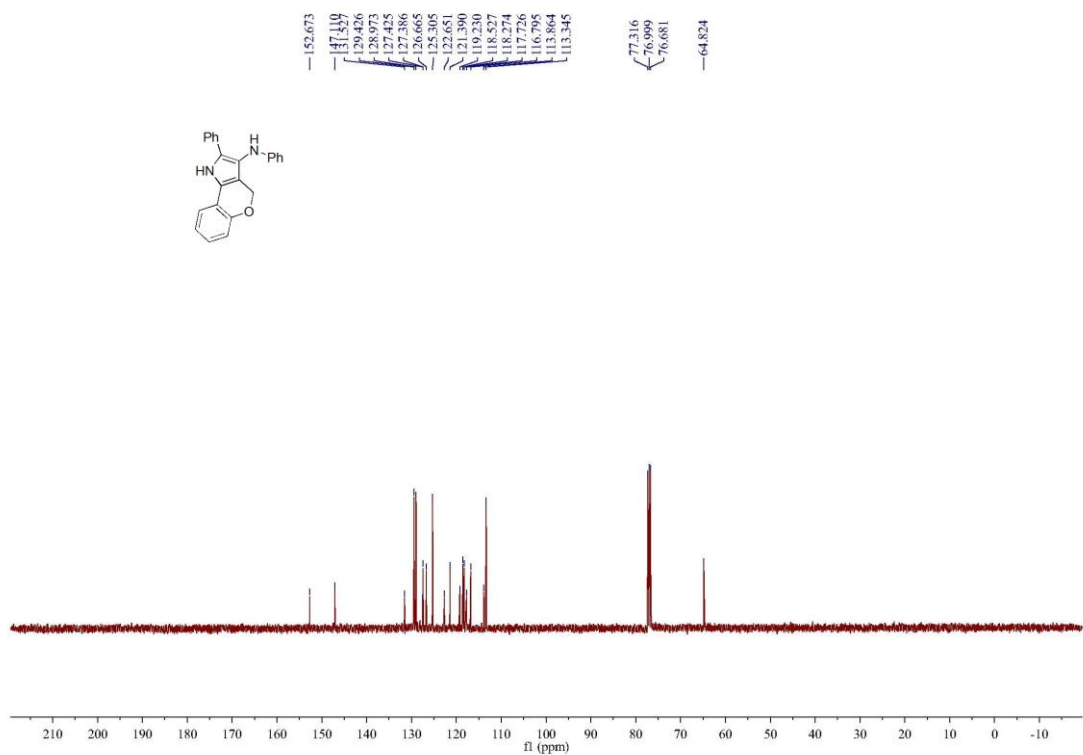

## <sup>13</sup>C NMR spectra of compound 3pa in CDCl<sub>3</sub> (400 MHz)

### *N*,2-Diphenyl-4,5,6,7-tetrahydro-1*H*-indol-3-amine (3qa)

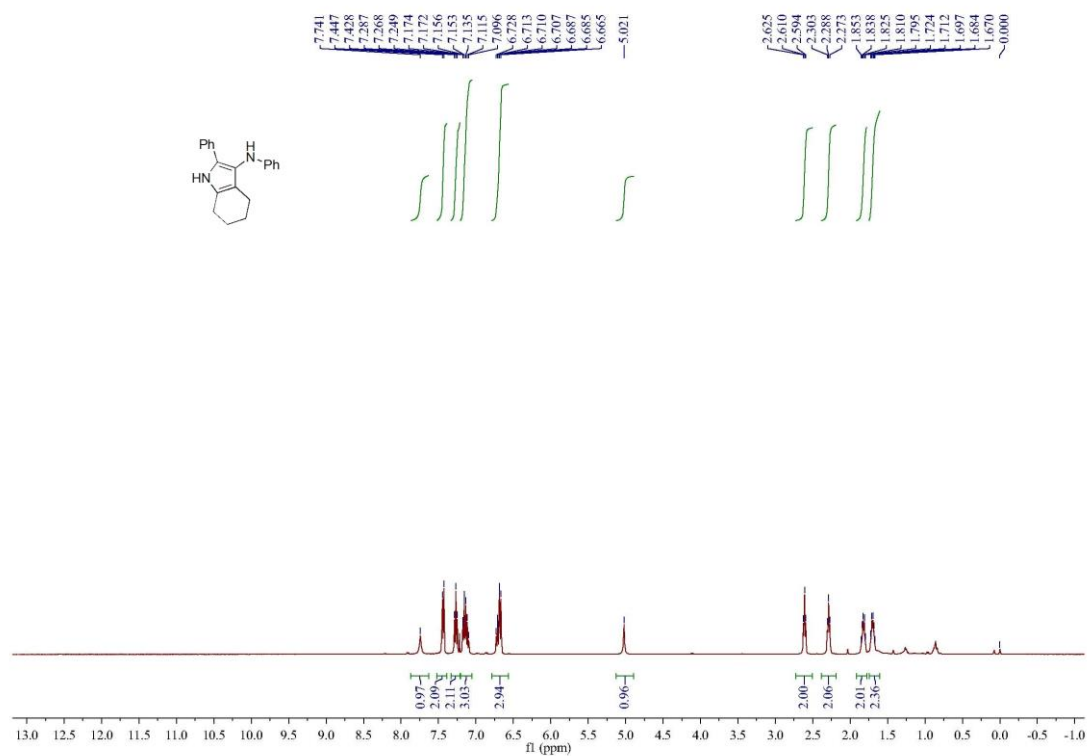

### <sup>1</sup>H NMR spectra of compound 3qa in CDCl<sub>3</sub> (400 MHz)

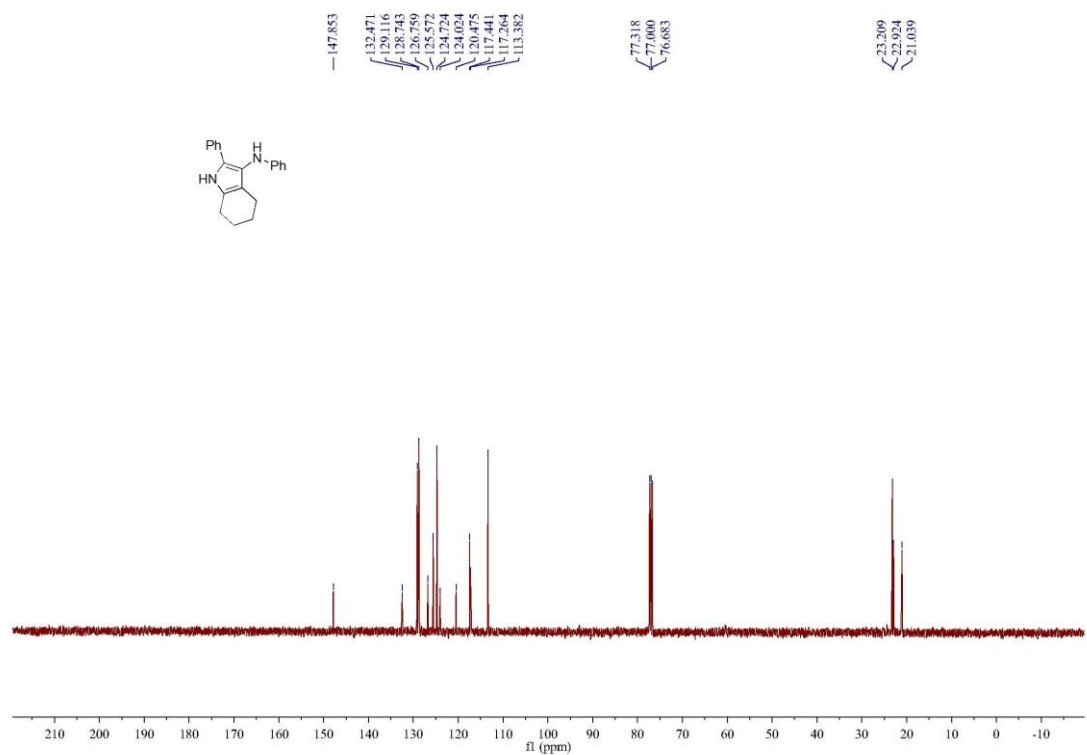

### <sup>13</sup>C NMR spectra of compound 3qa in CDCl<sub>3</sub> (400 MHz)

### *N*,2-Diphenyl-4,5,6,7-tetrahydro-1*H*-indol-3-amine (3ra)

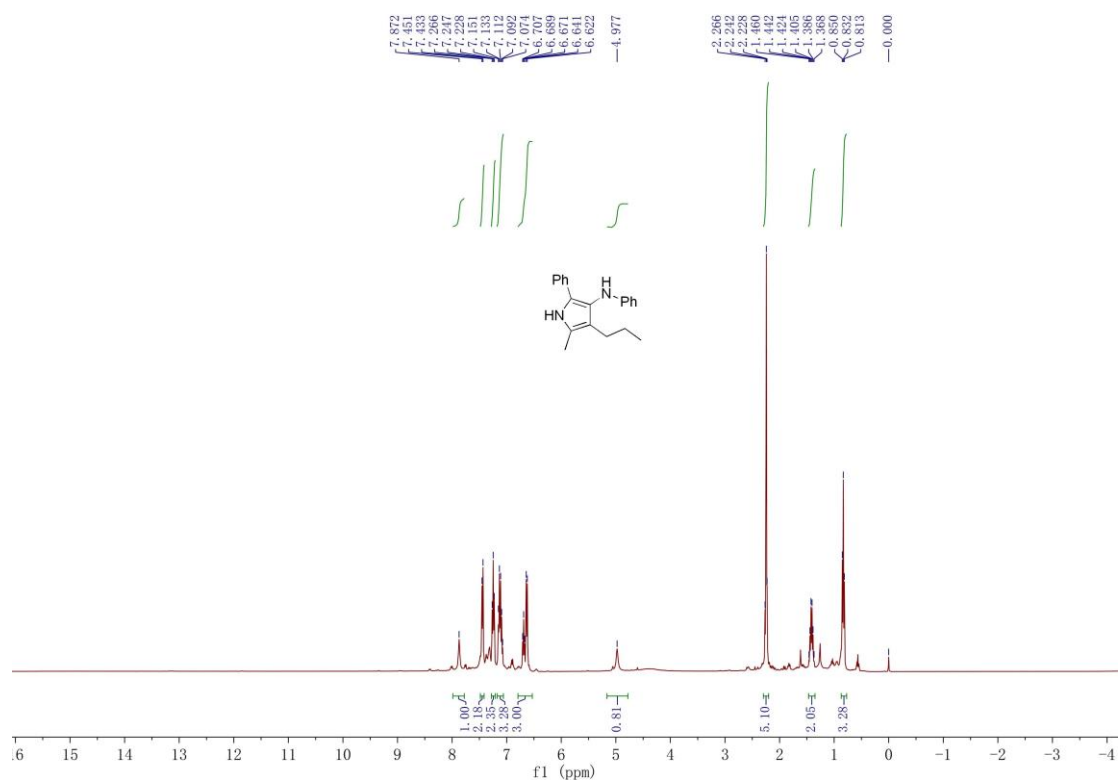

### <sup>1</sup>H NMR spectra of compound 3ra in CDCl<sub>3</sub> (400 MHz)

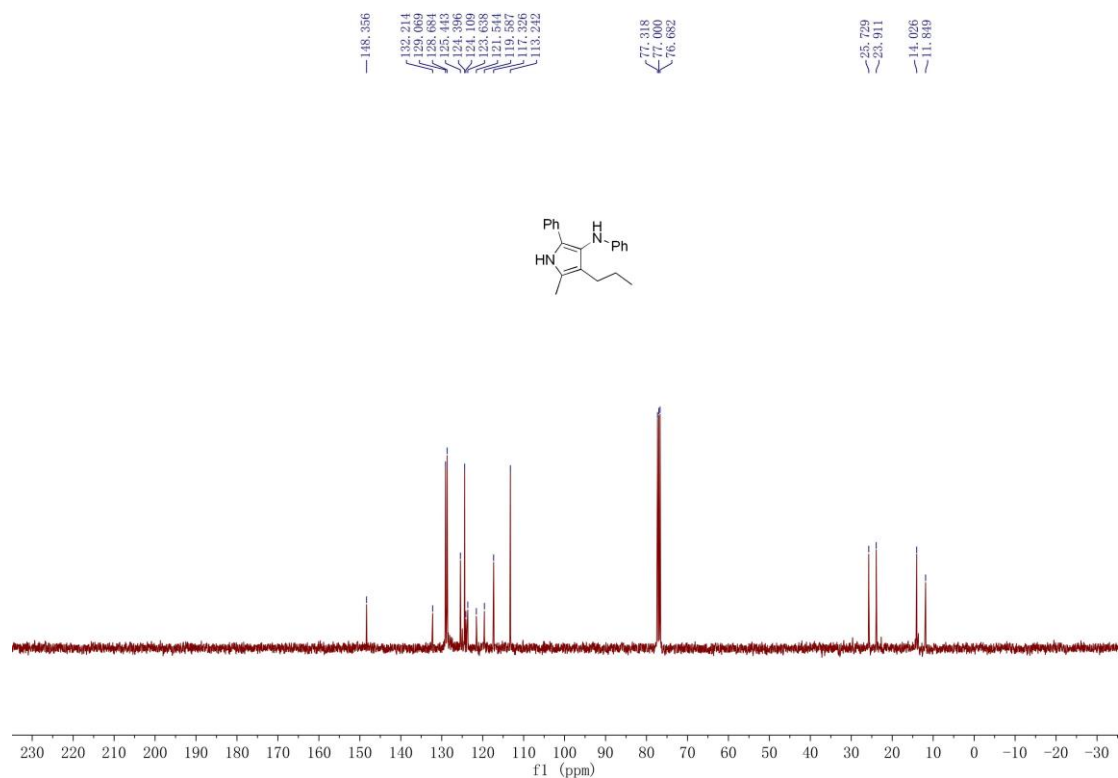

### <sup>13</sup>C NMR spectra of compound 3ra in CDCl<sub>3</sub> (400 MHz)



### *N*,5-Diphenyl-2-*p*-tolyl-1*H*-pyrrol-3-amine (3ab)

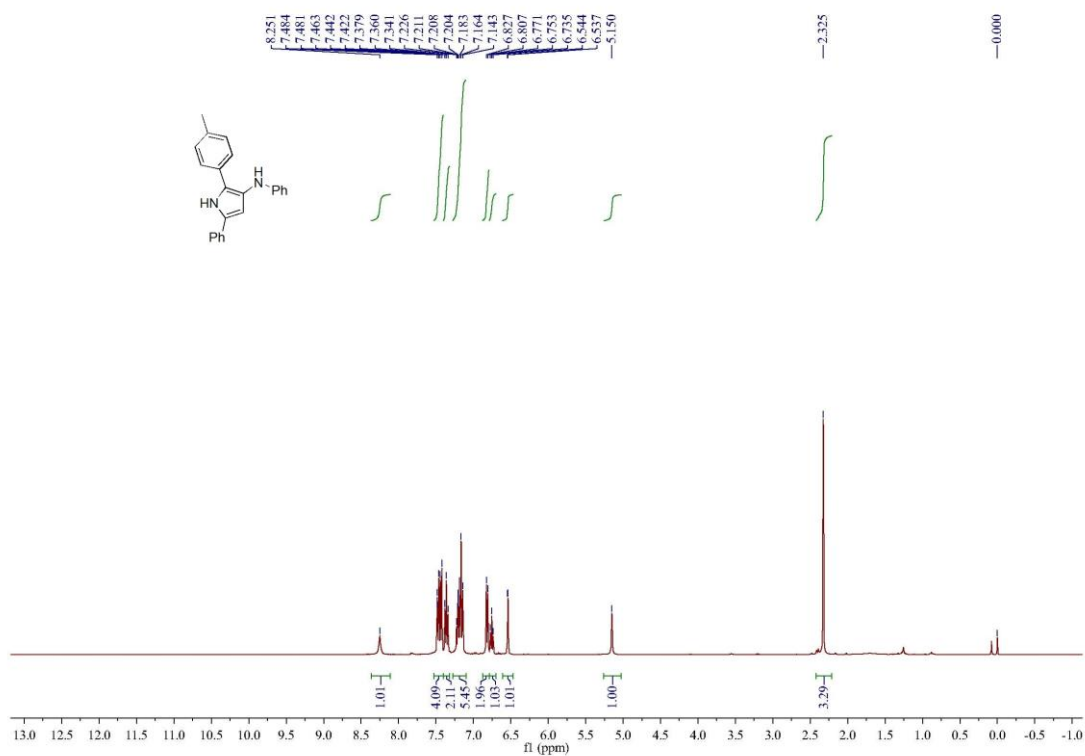

### <sup>1</sup>H NMR spectra of compound 3ab in CDCl<sub>3</sub> (400 MHz)

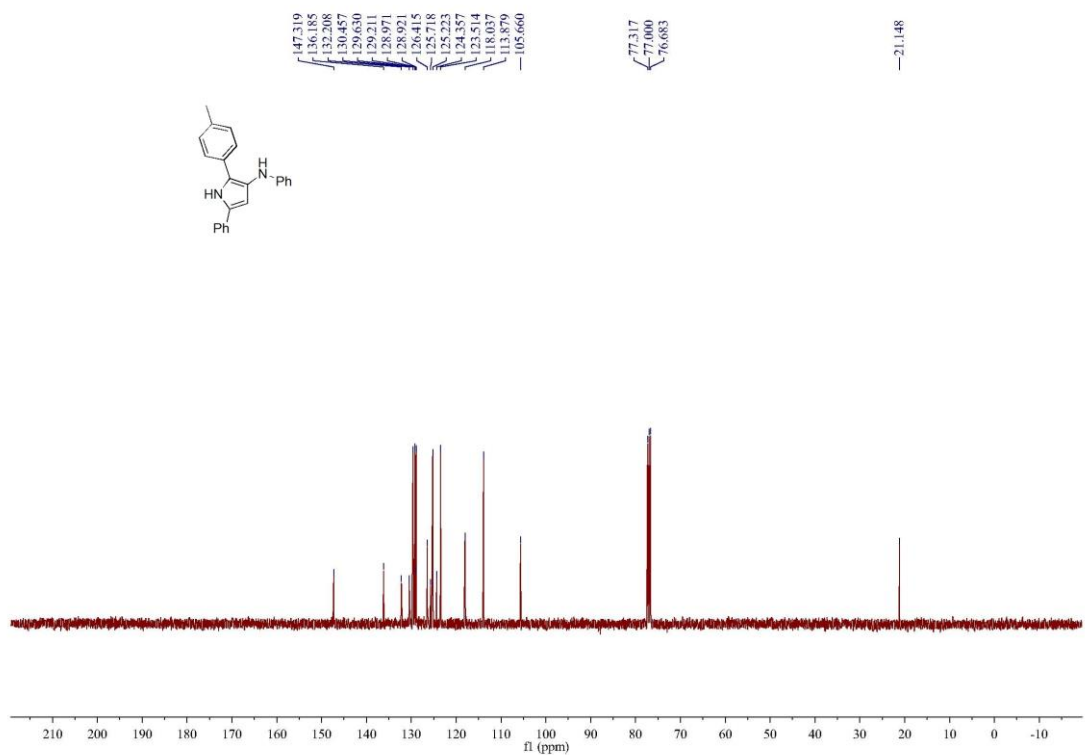

### <sup>13</sup>C NMR spectra of compound 3ab in CDCl<sub>3</sub> (400 MHz)

## 2-(4-Methoxyphenyl)-*N*,5-diphenyl-1*H*-pyrrol-3-amine (3ac)

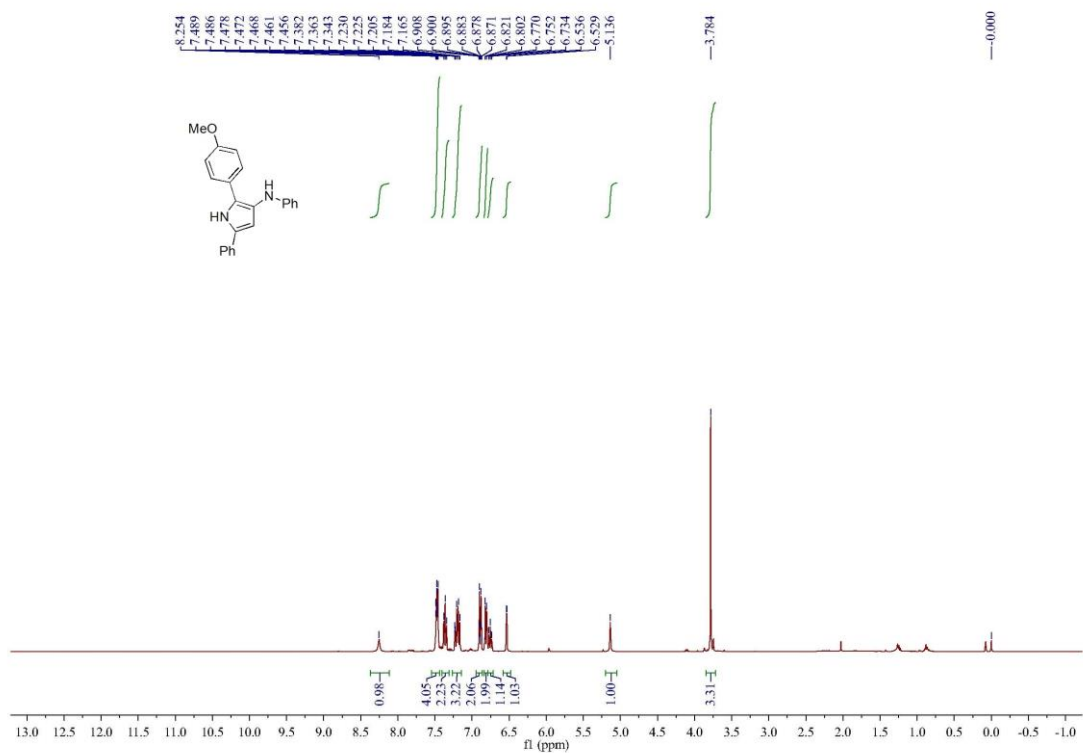

## <sup>1</sup>H NMR spectra of compound 3ac in CDCl<sub>3</sub> (400 MHz)

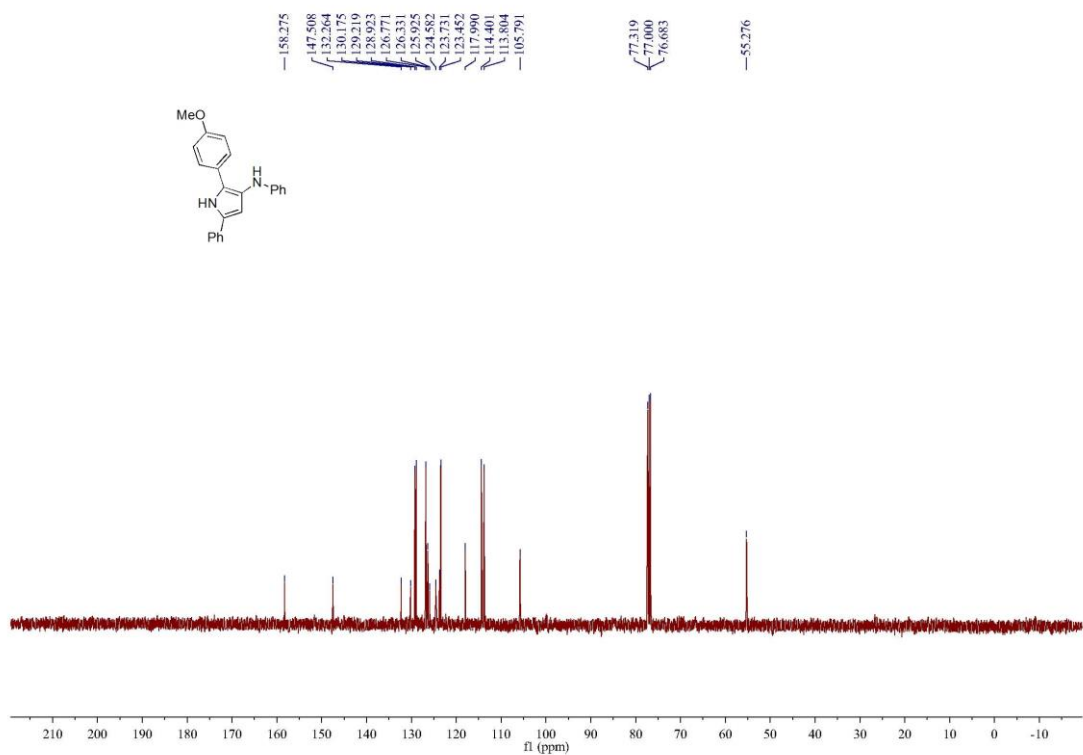

## <sup>13</sup>C NMR spectra of compound 3ac in CDCl<sub>3</sub> (400 MHz)

## 2-(4-Chlorophenyl)-*N*,5-diphenyl-1*H*-pyrrol-3-amine (3ad)

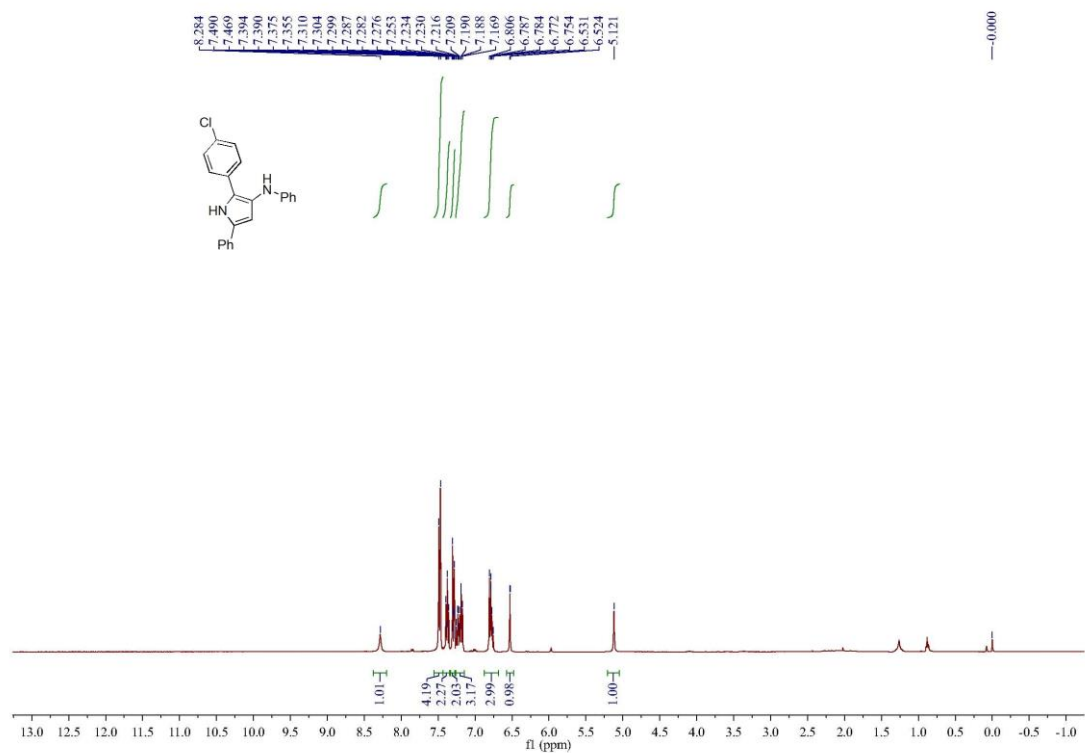

## <sup>1</sup>H NMR spectra of compound 3ad in CDCl<sub>3</sub> (400 MHz)

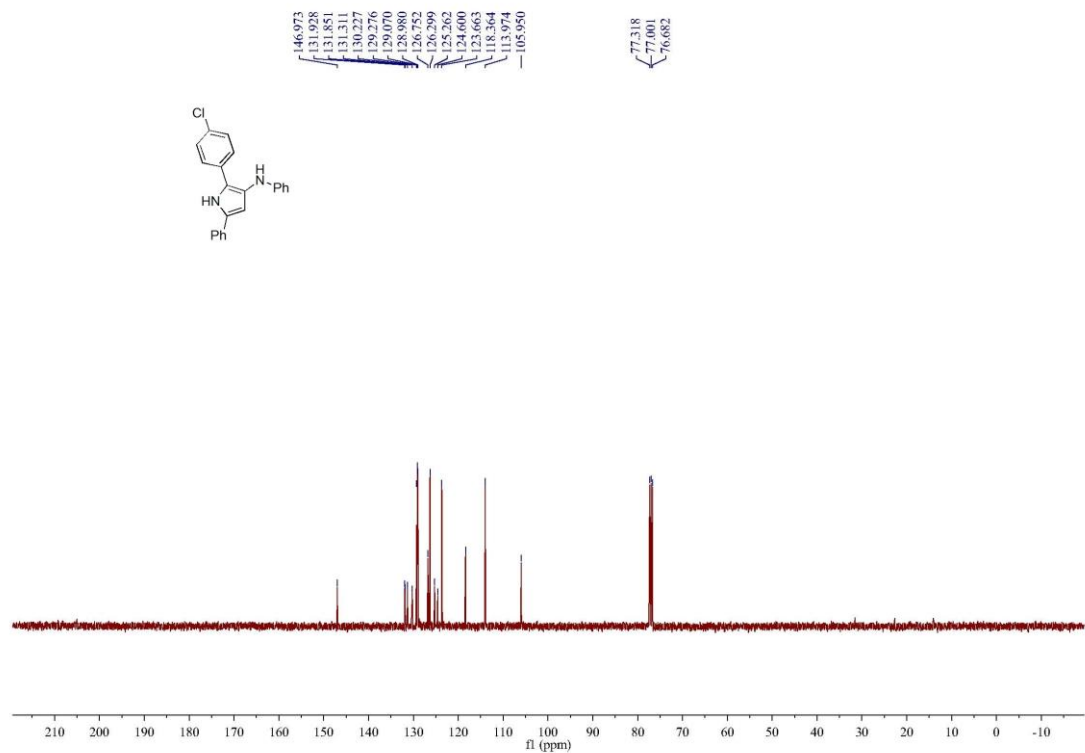

## <sup>13</sup>C NMR spectra of compound 3ad in CDCl<sub>3</sub> (400 MHz)

## 2-(4-Fluorophenyl)-*N*,5-diphenyl-1*H*-pyrrol-3-amine (3ae)

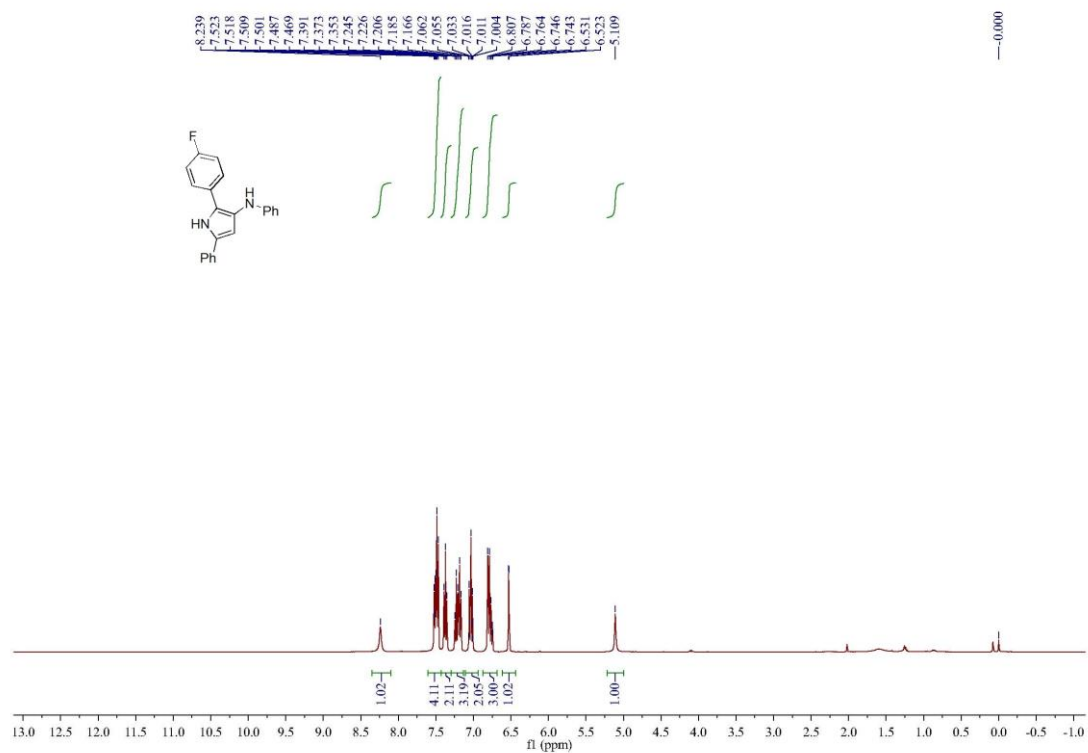

## <sup>1</sup>H NMR spectra of compound 3ae in CDCl<sub>3</sub> (400 MHz)

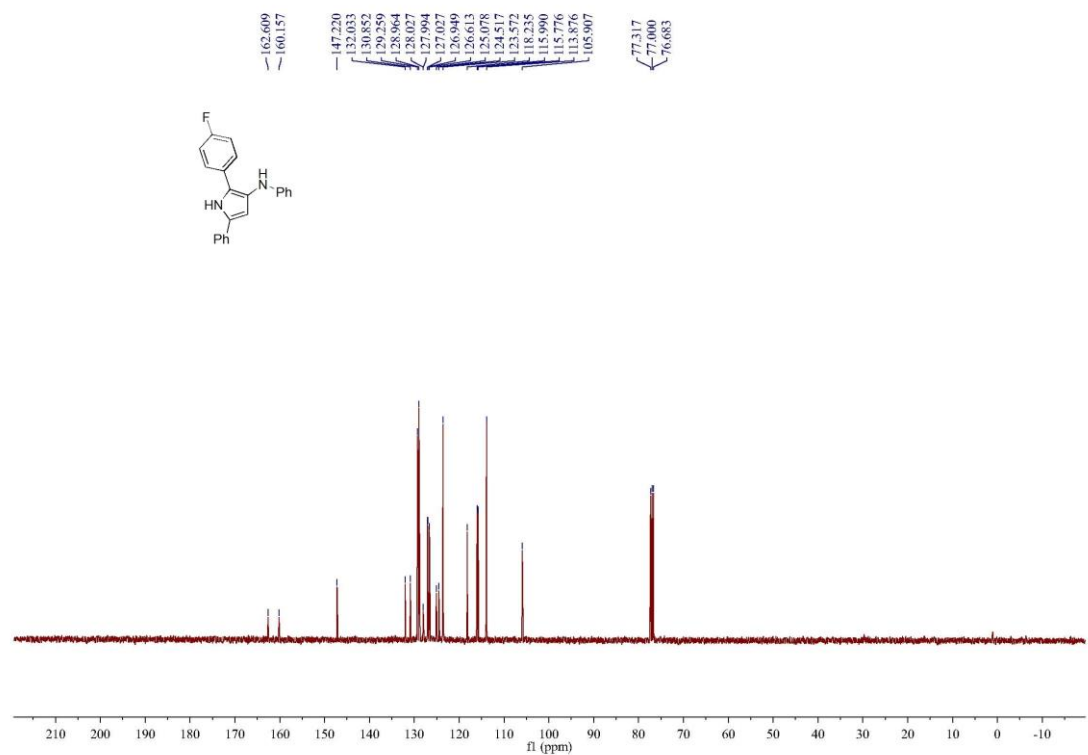

## <sup>13</sup>C NMR spectra of compound 3ae in CDCl<sub>3</sub> (400 MHz)

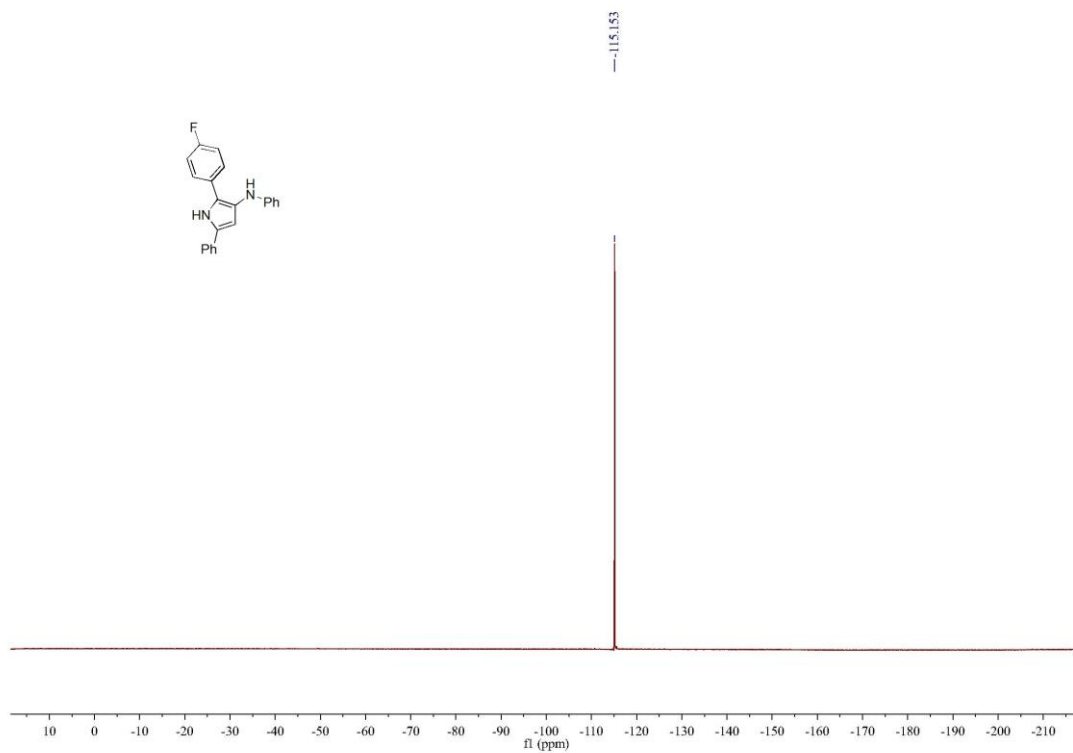

**$^{19}\text{F}$  NMR spectra of compound 3ae in  $\text{CDCl}_3$  (400 MHz)**

## 2-(3,4-Dimethoxyphenyl)-*N*,5-diphenyl-1*H*-pyrrol-3-amine (3af)

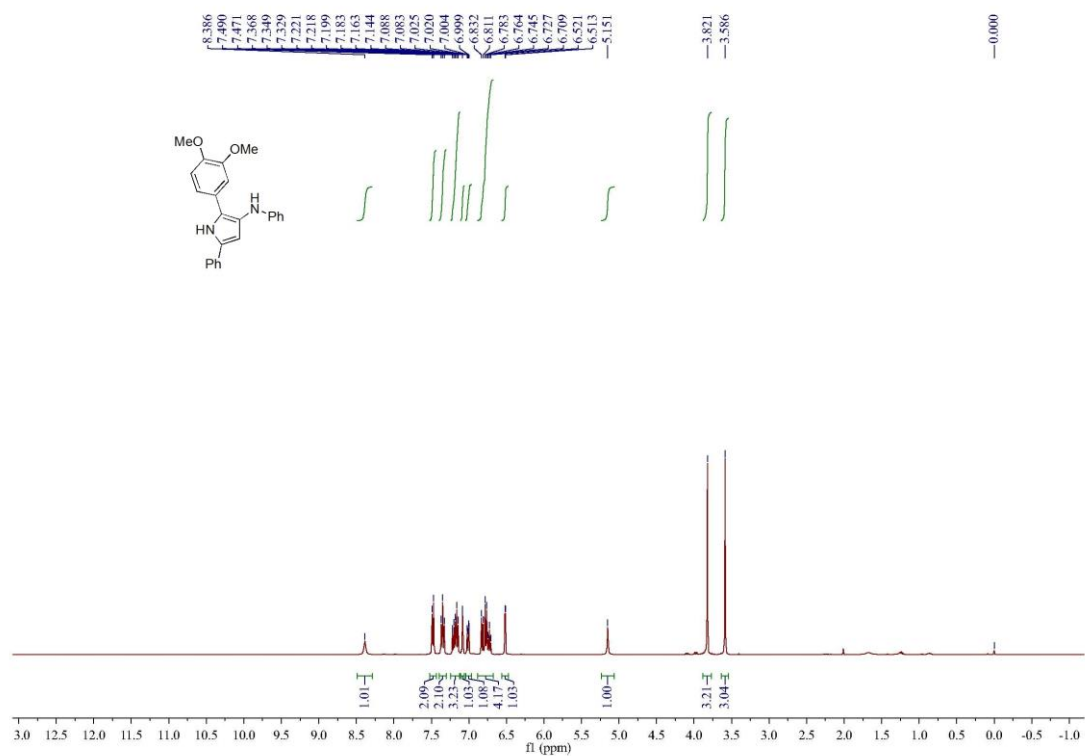

## <sup>1</sup>H NMR spectra of compound 3af in CDCl<sub>3</sub> (400 MHz)

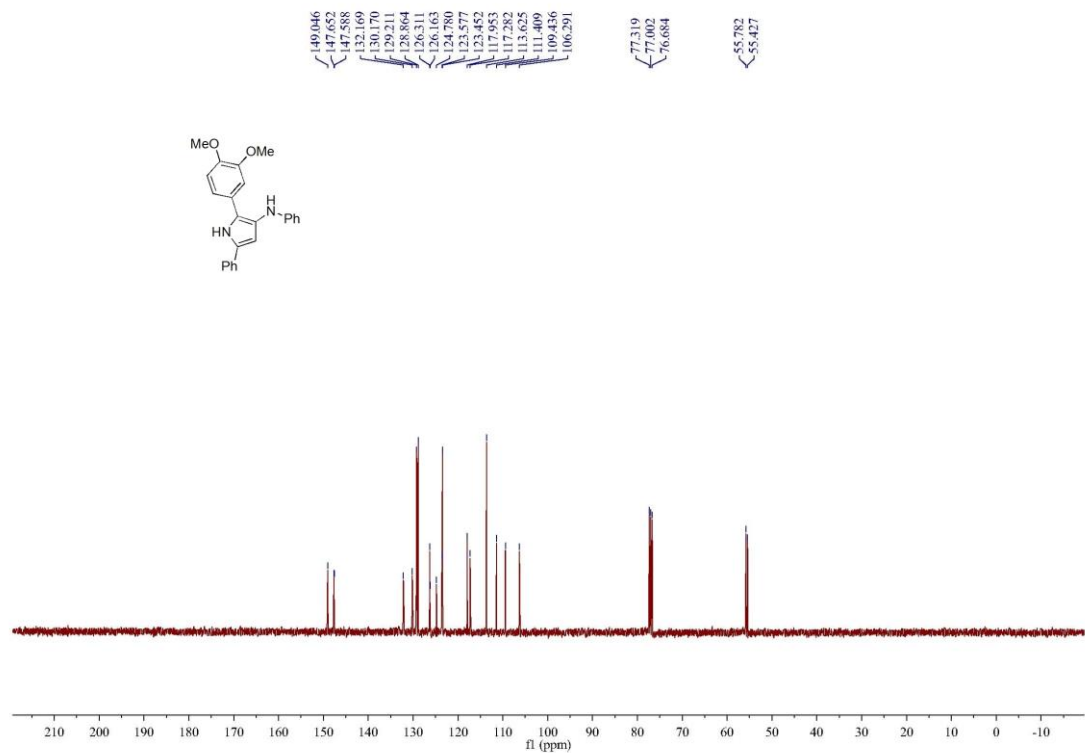

## <sup>13</sup>C NMR spectra of compound 3af in CDCl<sub>3</sub> (400 MHz)

## 2-(Naphthalen-2-yl)-*N*,5-diphenyl-1*H*-pyrrol-3-amine (3ag)

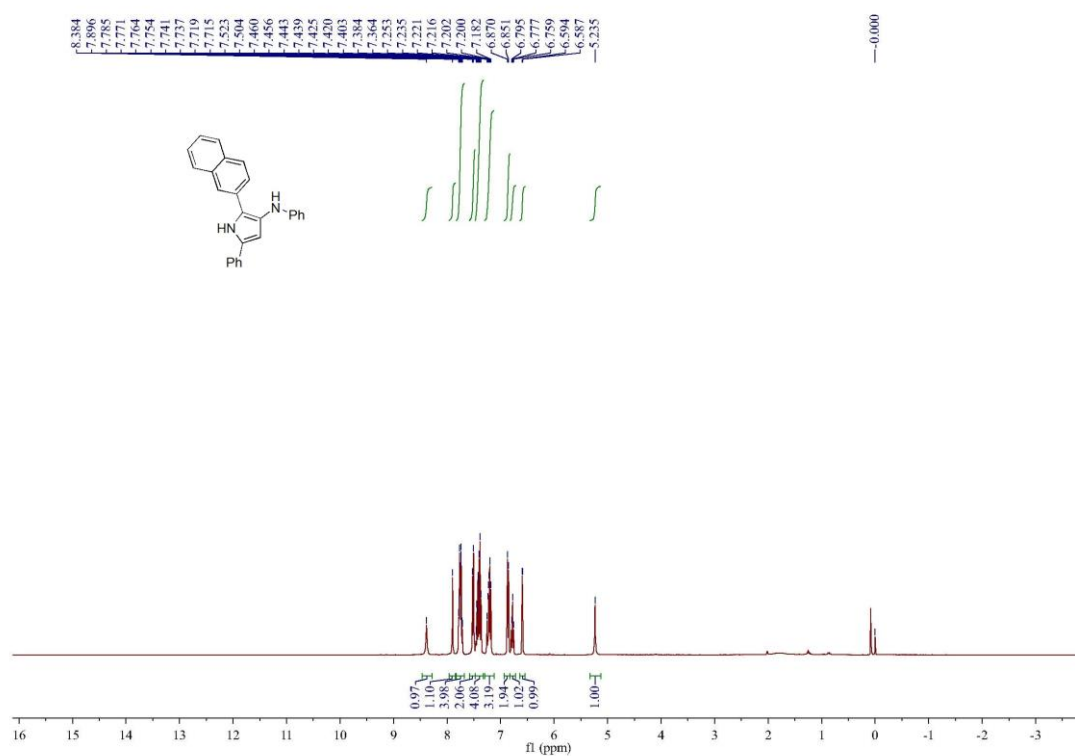

## <sup>1</sup>H NMR spectra of compound 3ag in CDCl<sub>3</sub> (400 MHz)

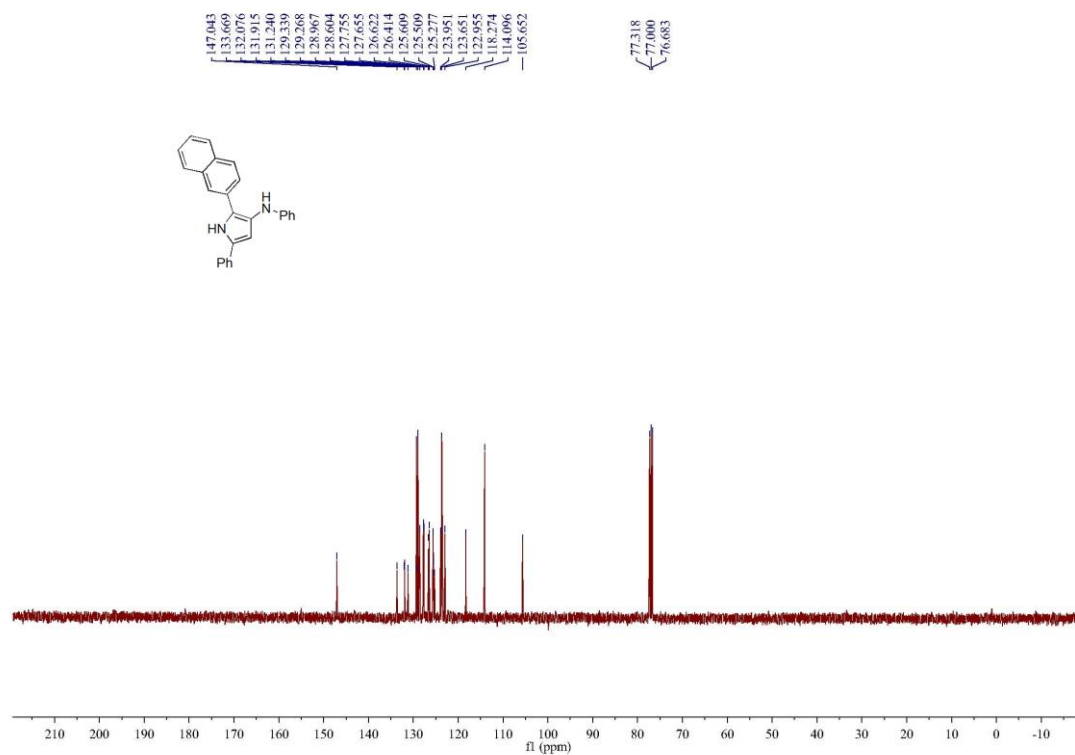

## <sup>13</sup>C NMR spectra of compound 3ag in CDCl<sub>3</sub> (400 MHz)

### *N*,5-Diphenyl-2-(thiophen-3-yl)-1*H*-pyrrol-3-amine (3ah)

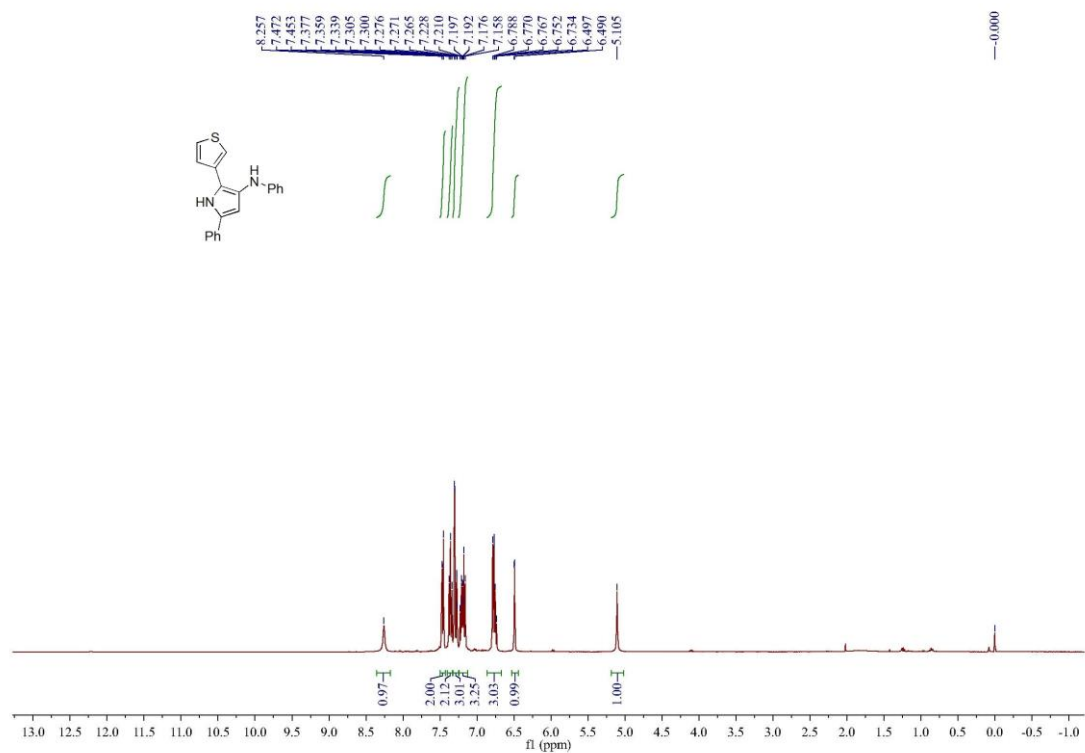

### <sup>1</sup>H NMR spectra of compound 3ah in CDCl<sub>3</sub> (400 MHz)

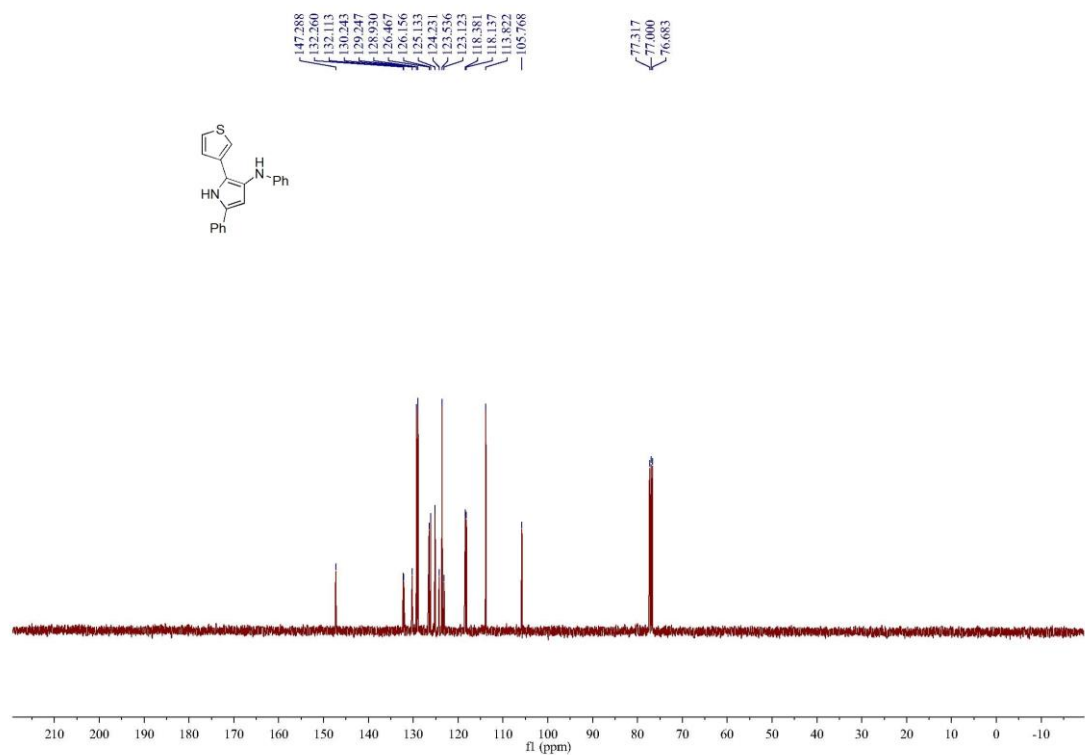

### <sup>13</sup>C NMR spectra of compound 3ah in CDCl<sub>3</sub> (400 MHz)



### 2-Methyl-N,5-diphenyl-1H-pyrrol-3-amine (3ai)

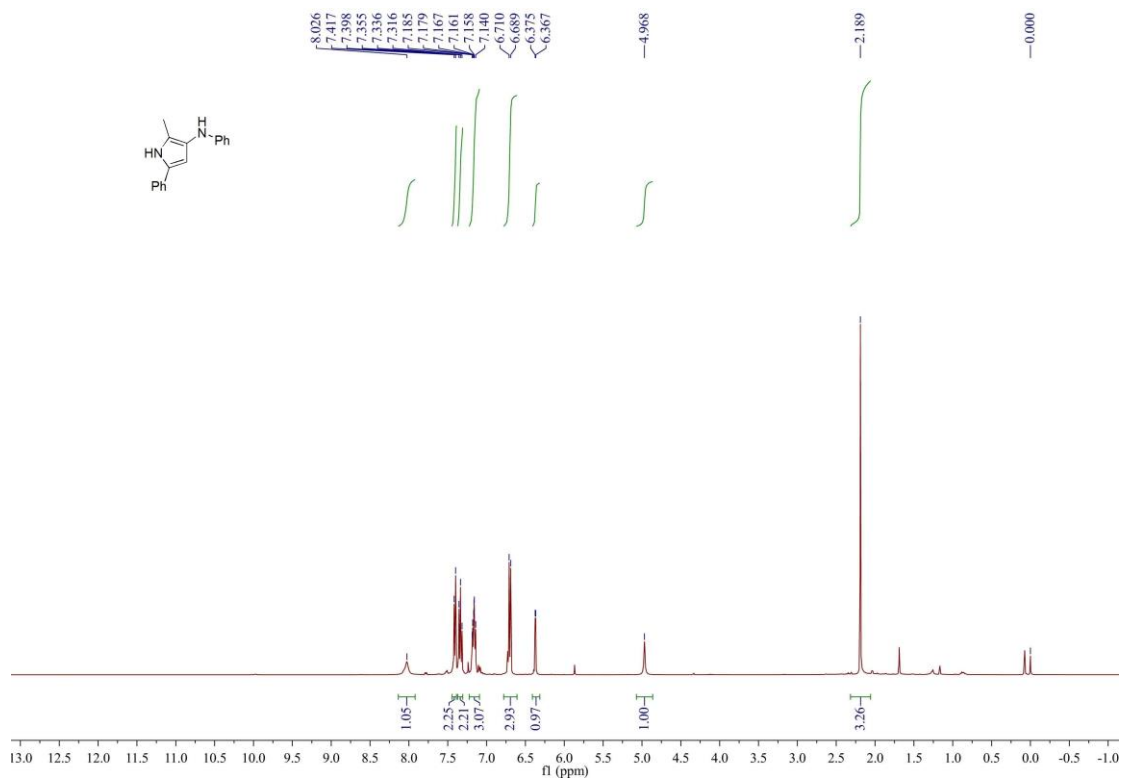

### <sup>1</sup>H NMR spectra of compound 3ai in CDCl<sub>3</sub> (400 MHz)

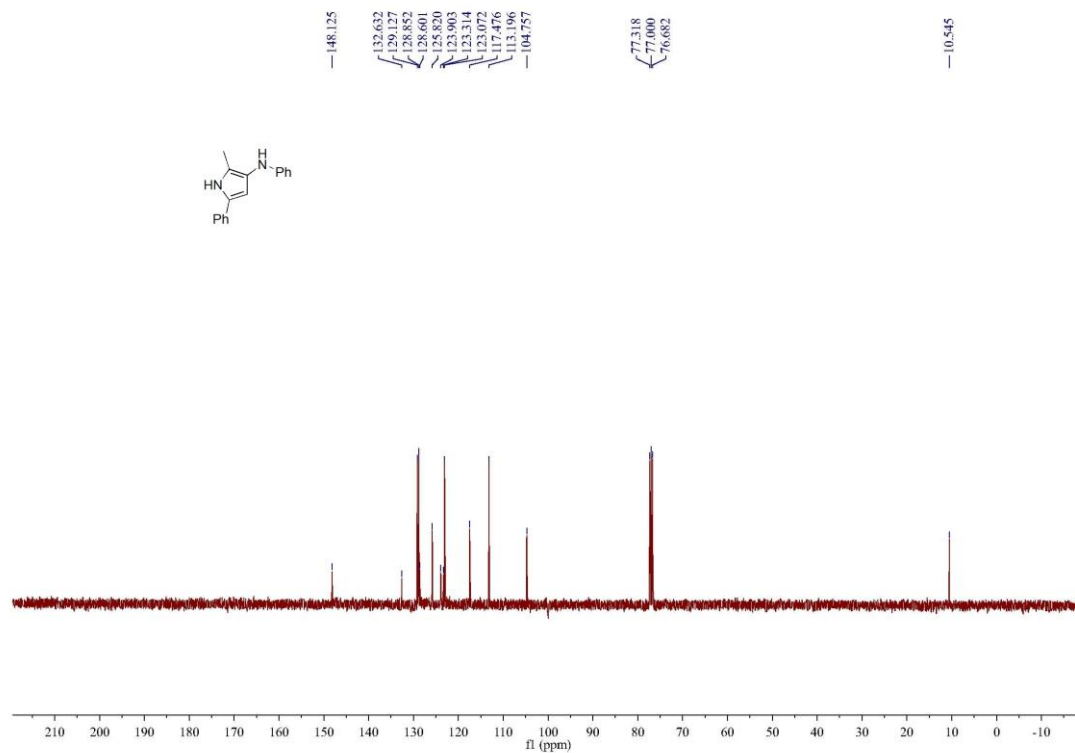

### <sup>13</sup>C NMR spectra of compound 3ai in CDCl<sub>3</sub> (400 MHz)

### 2-Methyl-5-phenyl-N-p-tolyl-1H-pyrrol-3-amine (3aj)

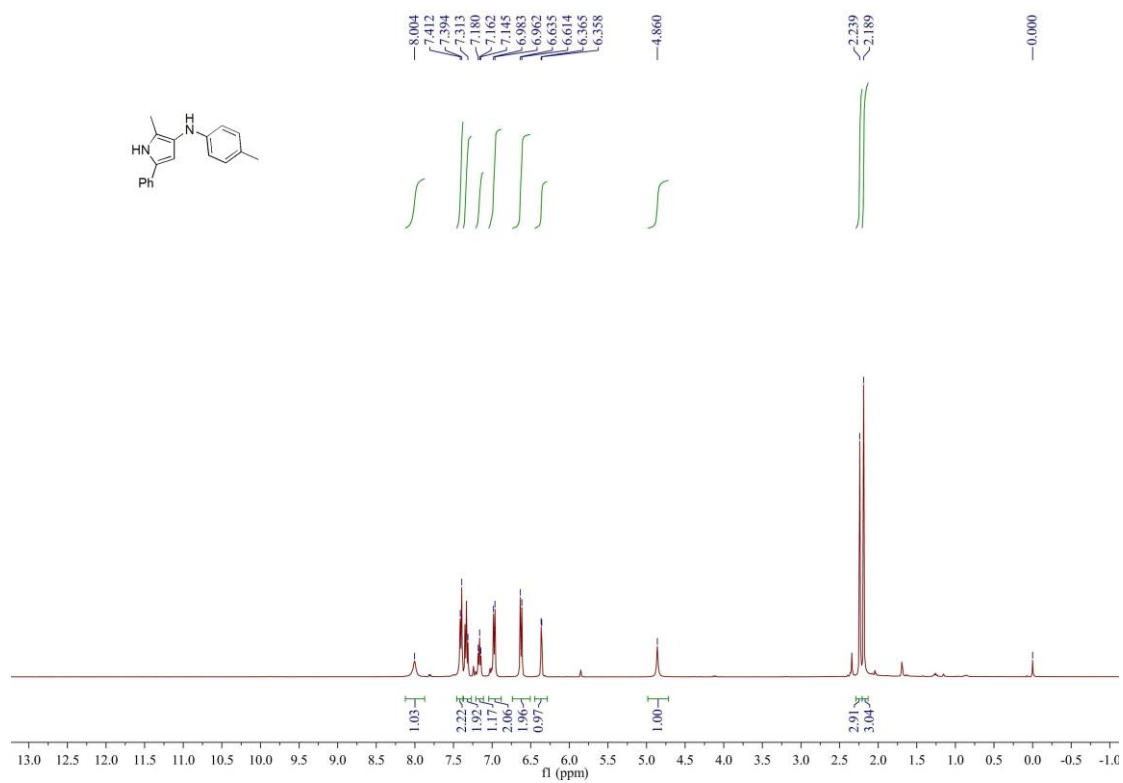

### <sup>1</sup>H NMR spectra of compound 3aj in CDCl<sub>3</sub> (400 MHz)

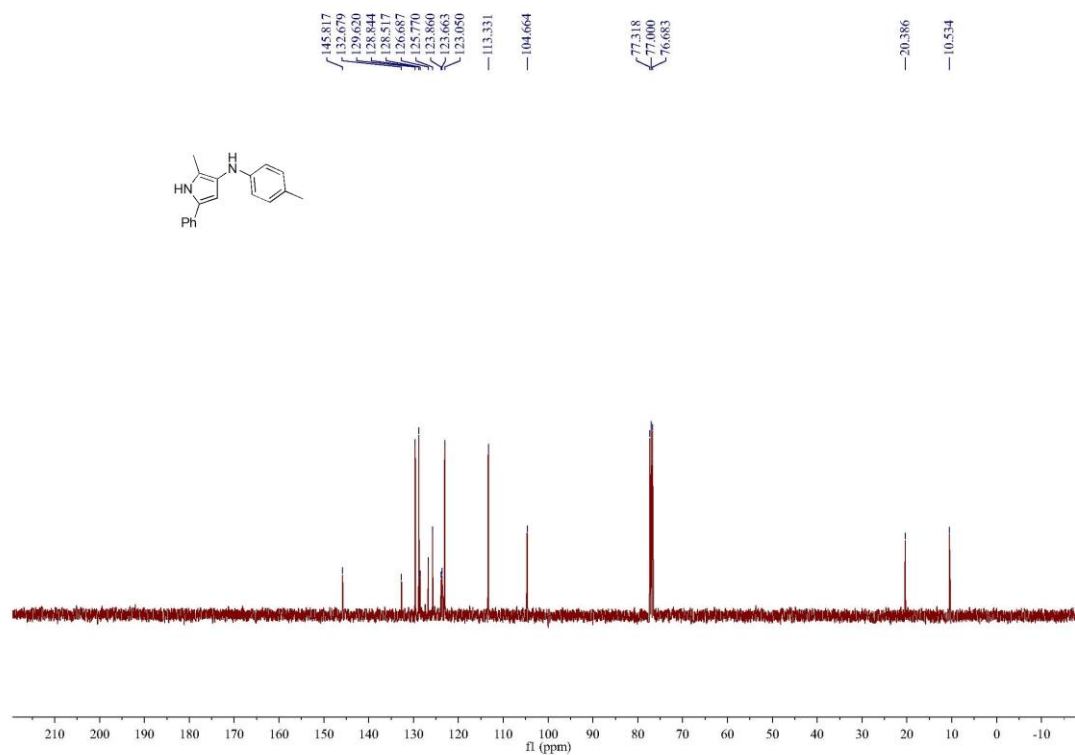

### <sup>13</sup>C NMR spectra of compound 3aj in CDCl<sub>3</sub> (400 MHz)

### 2,5-Diphenyl-N-p-tolyl-1H-pyrrol-3-amine (3ak)

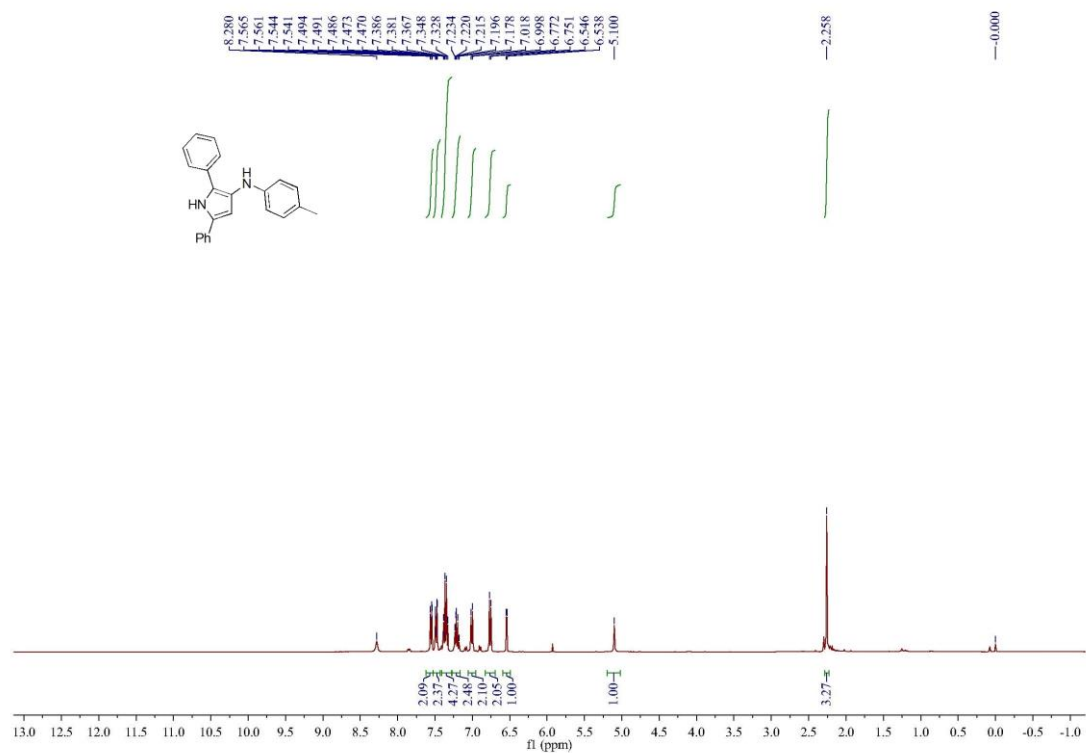

### <sup>1</sup>H NMR spectra of compound 3ak in CDCl<sub>3</sub> (400 MHz)

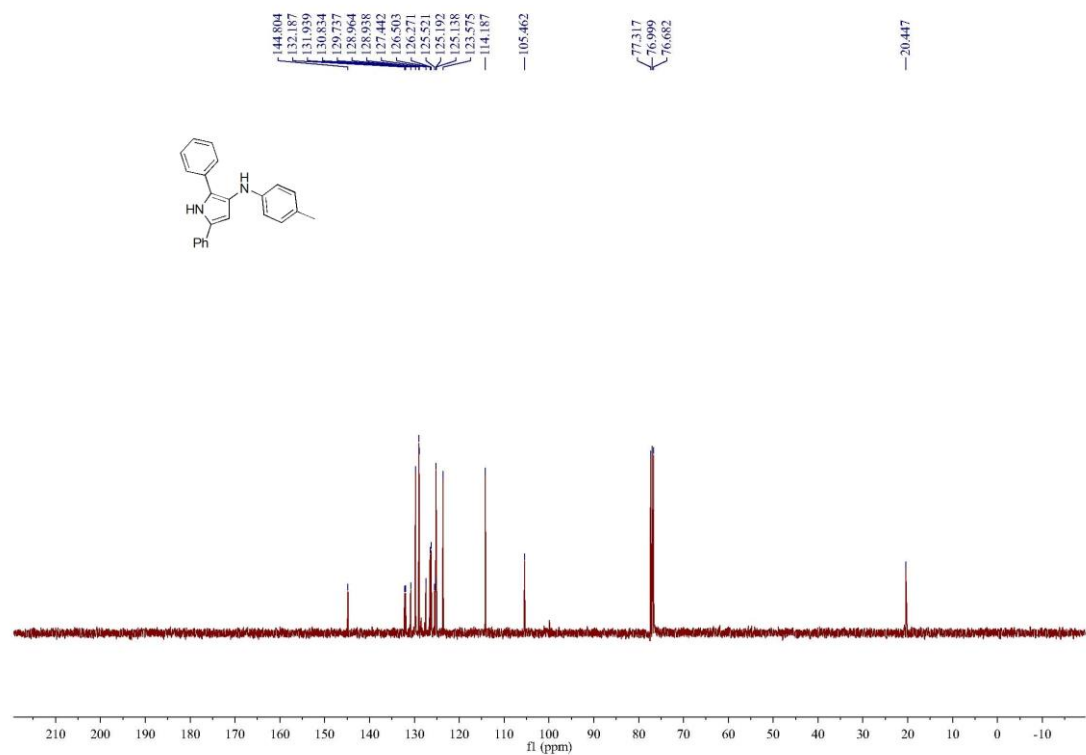

### <sup>13</sup>C NMR spectra of compound 3ak in CDCl<sub>3</sub> (400 MHz)

### *N*-(4-Methoxyphenyl)-2,5-diphenyl-1*H*-pyrrol-3-amine (3a)

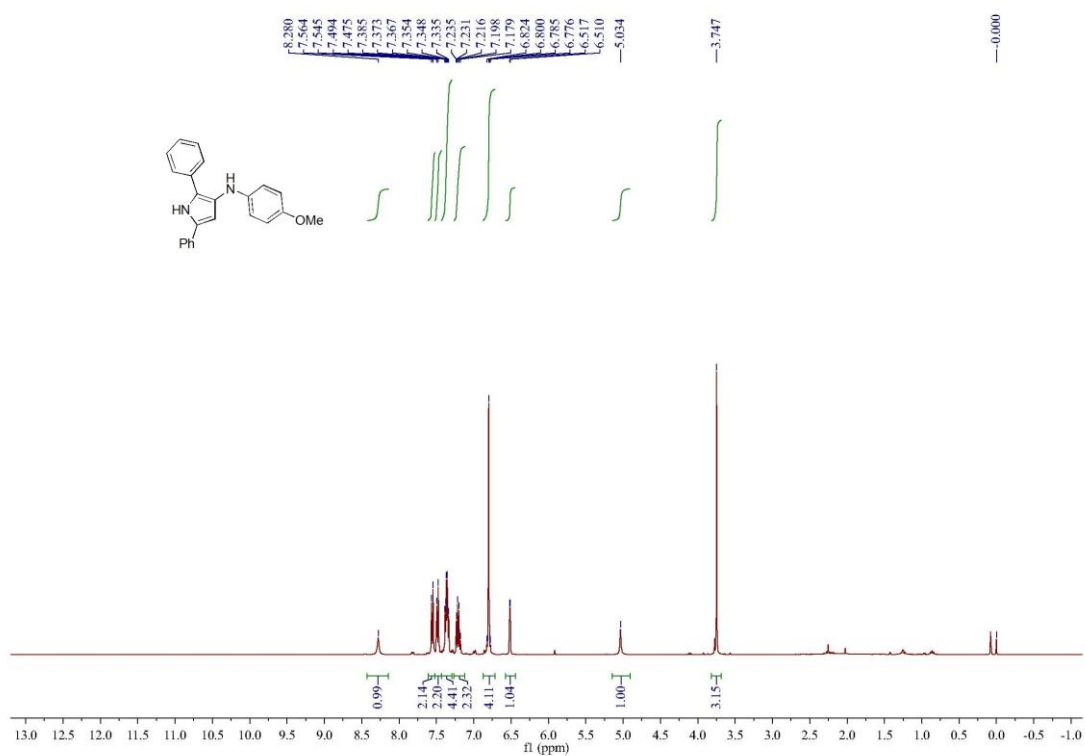

### <sup>1</sup>H NMR spectra of compound 3a in CDCl<sub>3</sub> (400 MHz)

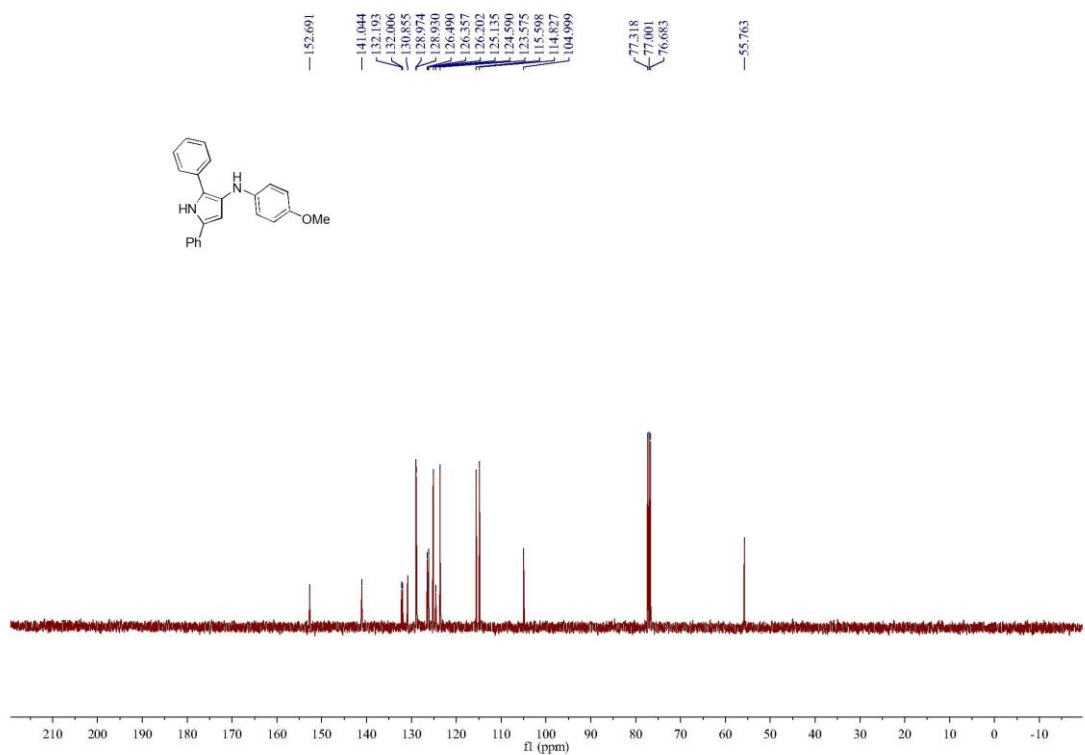

### <sup>13</sup>C NMR spectra of compound 3a in CDCl<sub>3</sub> (400 MHz)

### ***N*-(4-Chlorophenyl)-2,5-diphenyl-1*H*-pyrrol-3-amine (3am)**

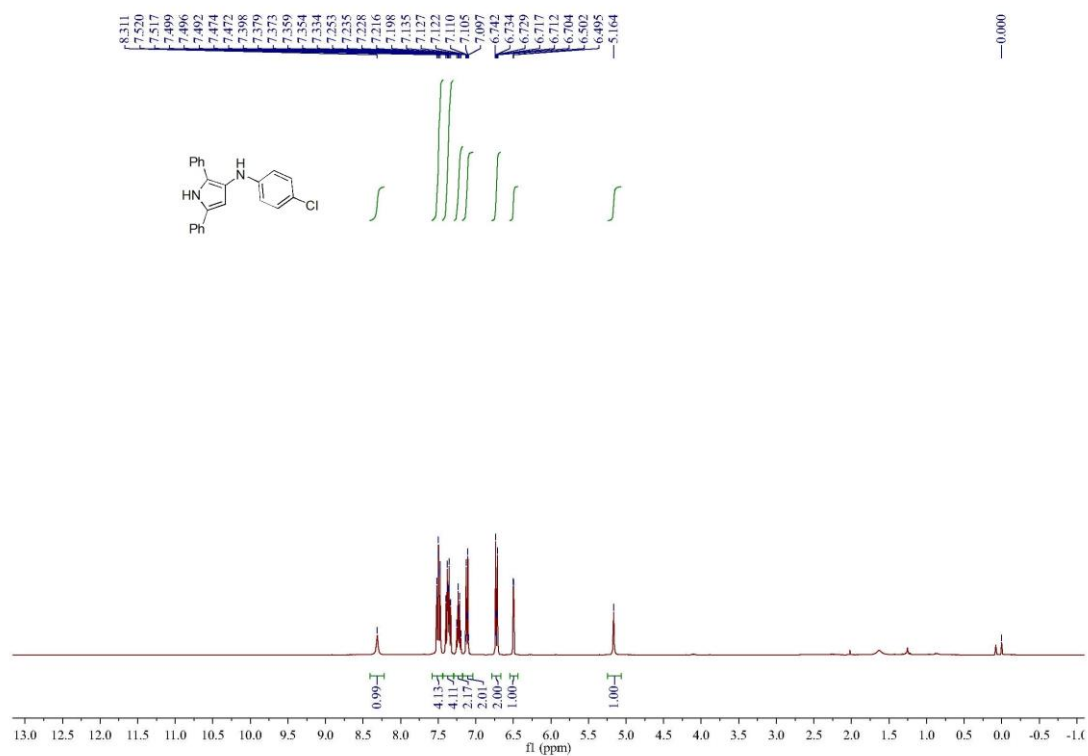

### **<sup>13</sup>C NMR spectra of compound 3am in CDCl<sub>3</sub> (400 MHz)**

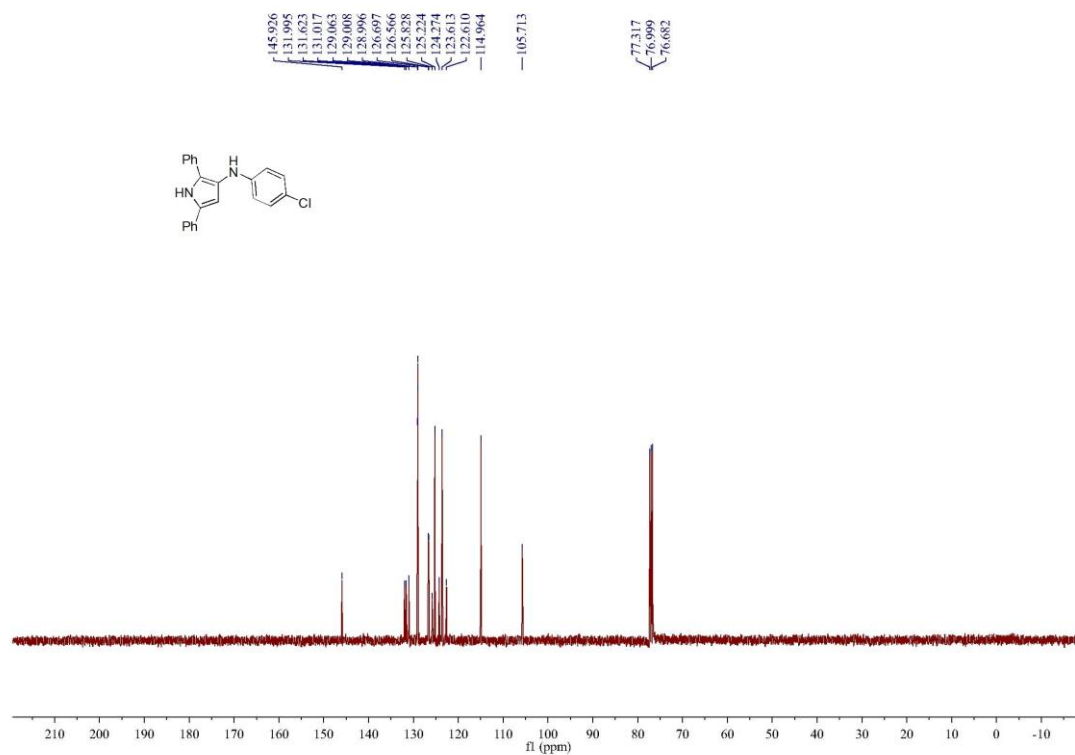

### **<sup>13</sup>C NMR spectra of compound 3am in CDCl<sub>3</sub> (400 MHz)**

### ***N*-(4-Bromophenyl)-2,5-diphenyl-1*H*-pyrrol-3-amine (3an)**

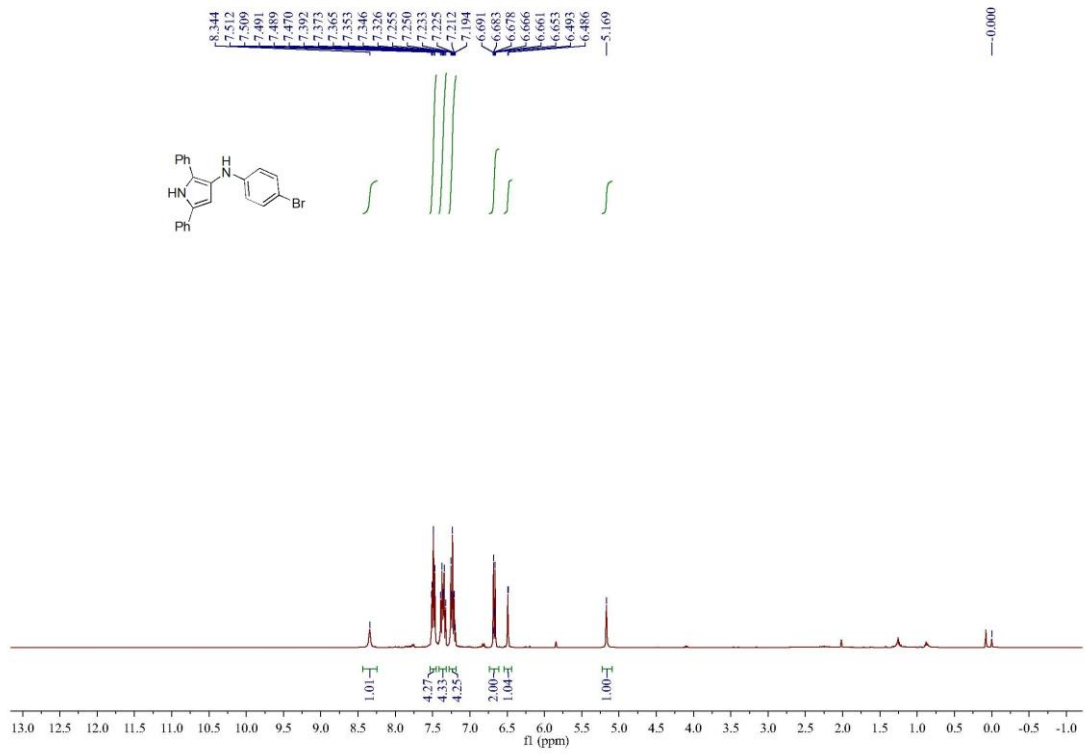

### **<sup>1</sup>H NMR spectra of compound 3an in CDCl<sub>3</sub> (400 MHz)**

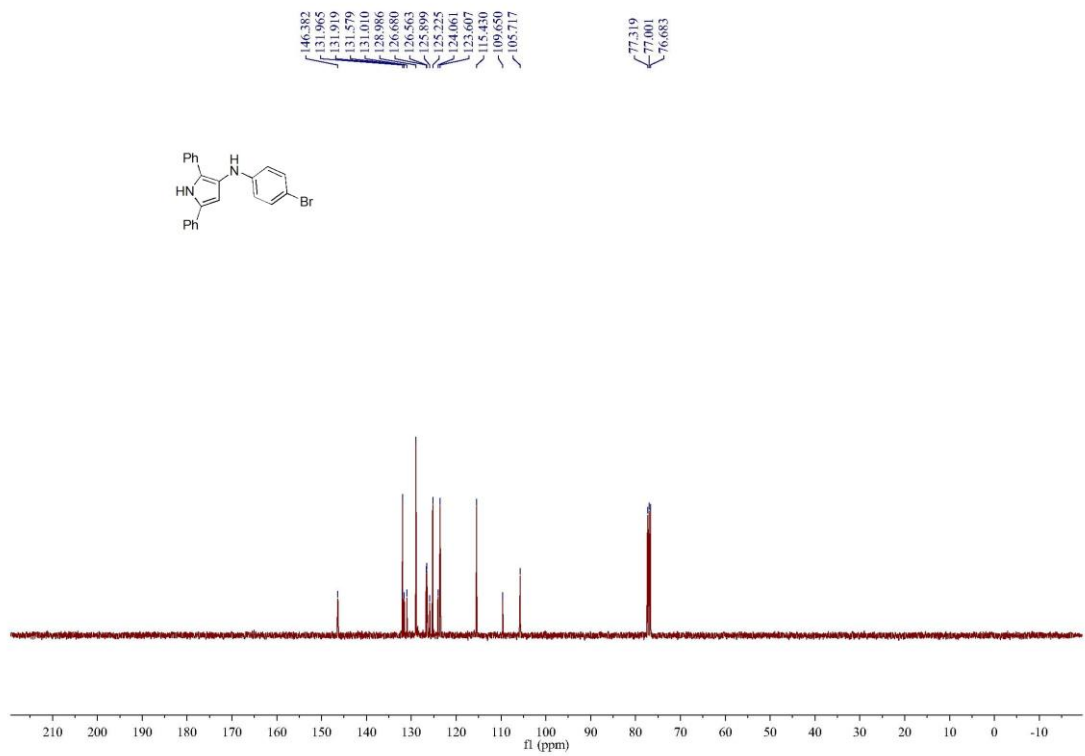

### **<sup>13</sup>C NMR spectra of compound 3an in CDCl<sub>3</sub> (400 MHz)**

## 2,5-Diphenyl-N-(4-(trifluoromethyl)phenyl)-1H-pyrrol-3-amine (3ao)

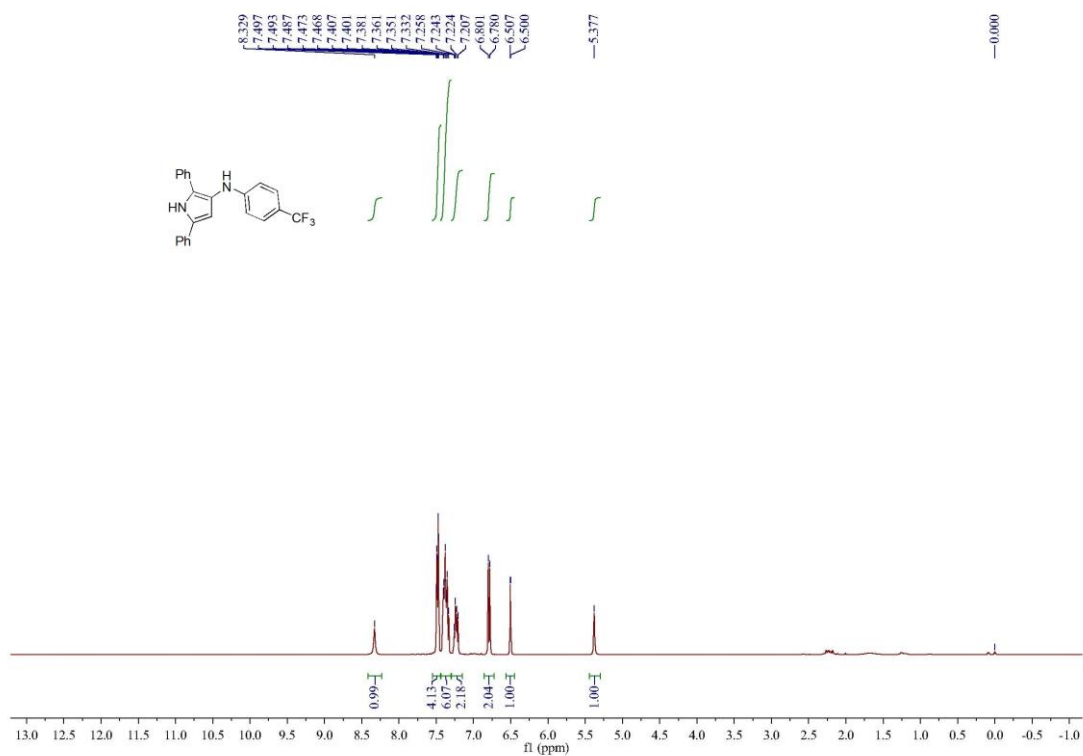

## <sup>1</sup>H NMR spectra of compound 3ao in CDCl<sub>3</sub> (400 MHz)

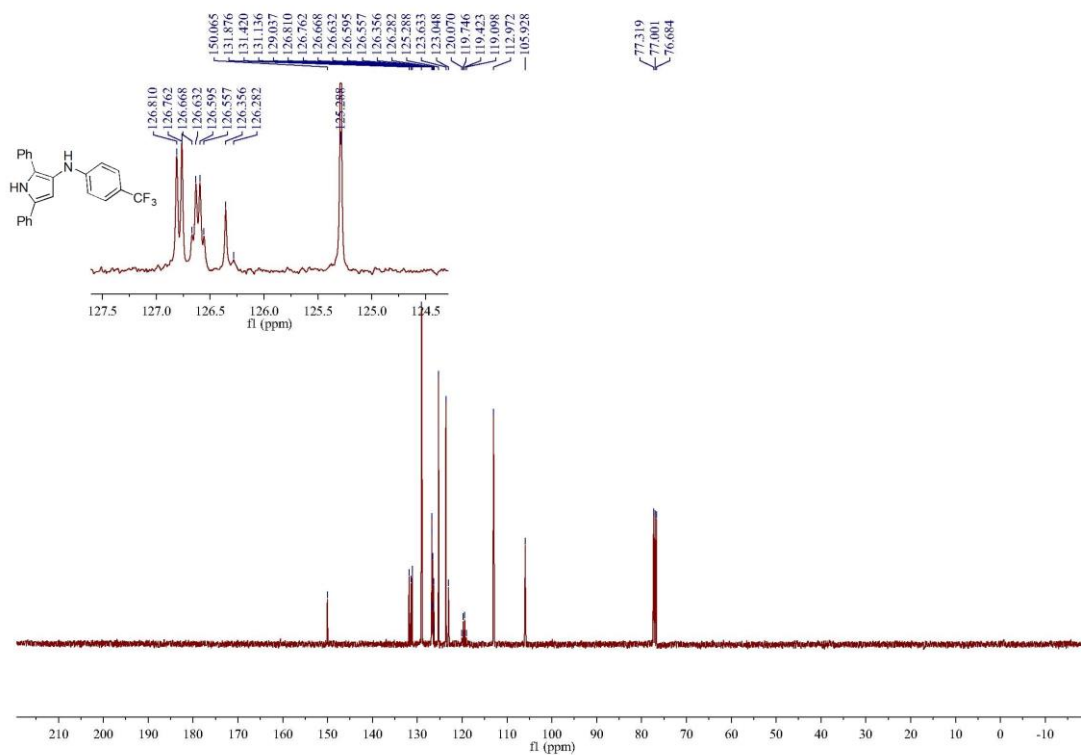

## <sup>13</sup>C NMR spectra of compound 3ao in CDCl<sub>3</sub> (400 MHz)

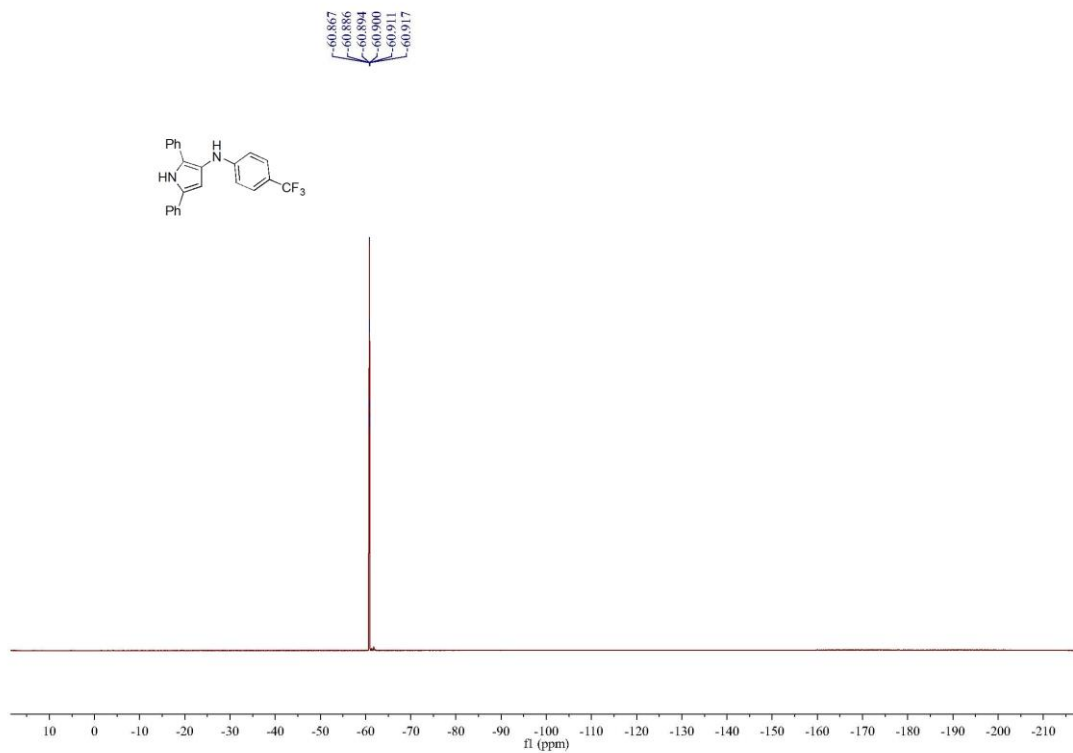

**$^{19}\text{F}$  NMR spectra of compound 3ao in  $\text{CDCl}_3$  (400 MHz)**



### *N*-(3-Methoxyphenyl)-2,5-diphenyl-1*H*-pyrrol-3-amine (3ap)

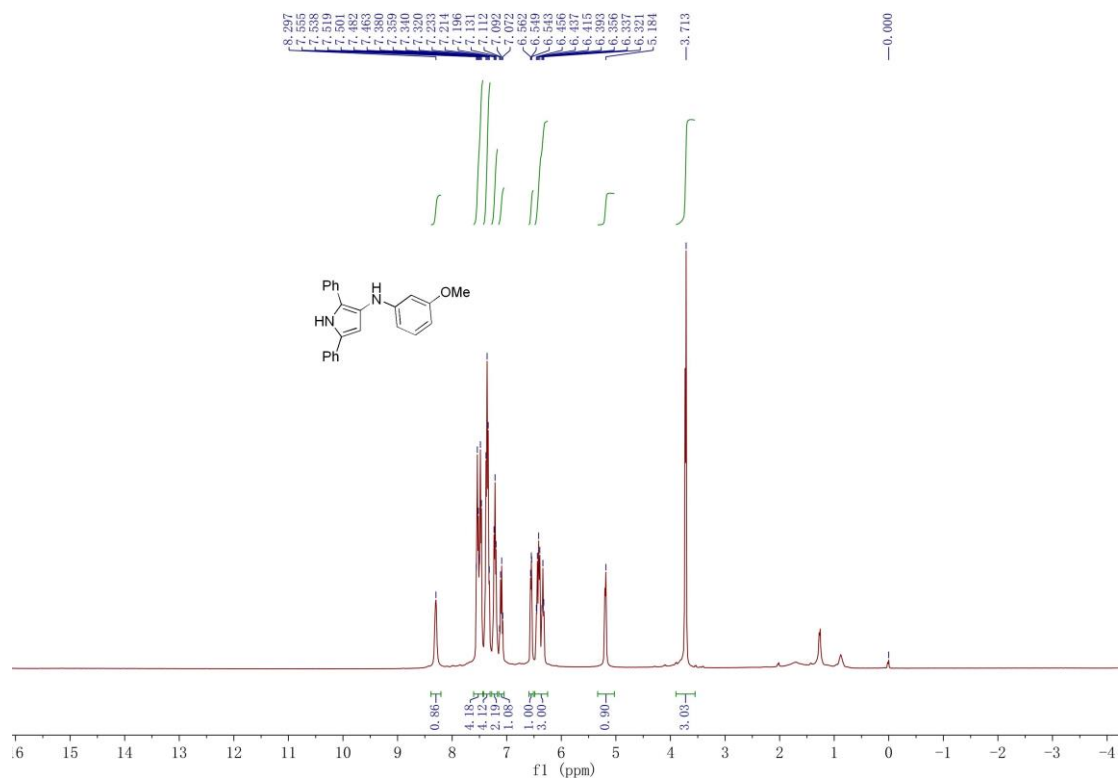

### <sup>1</sup>H NMR spectra of compound 3ap in CDCl<sub>3</sub> (400 MHz)

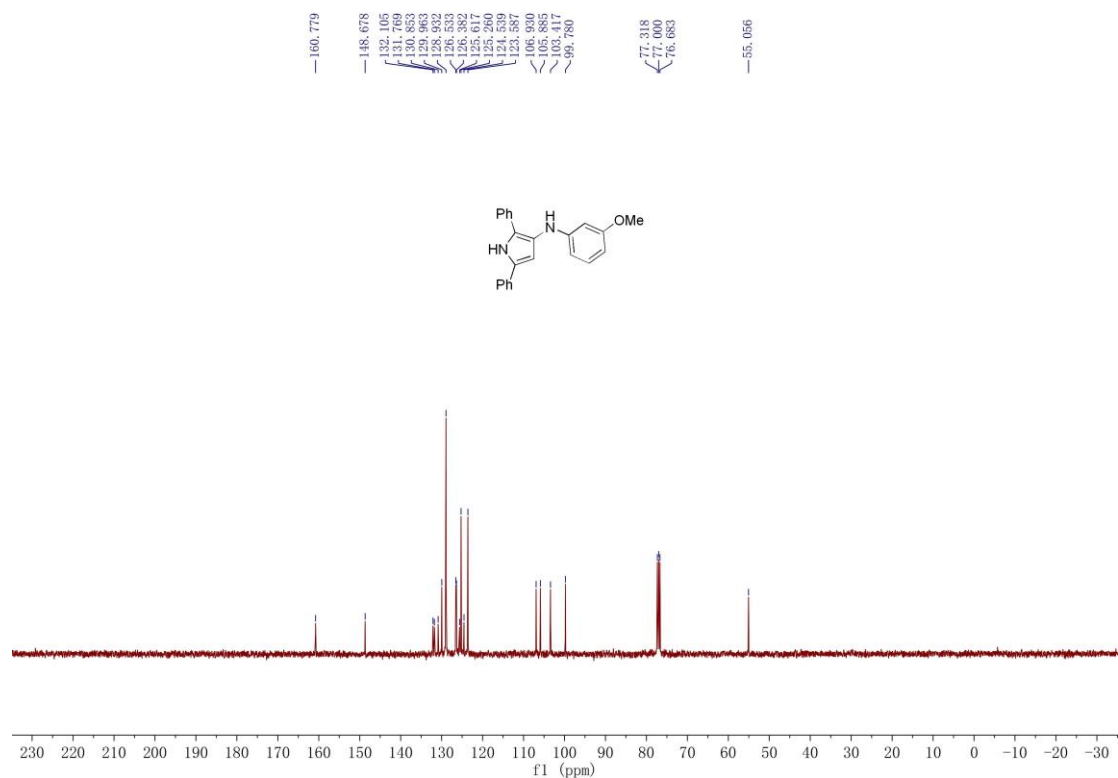

### <sup>13</sup>C NMR spectra of compound 3ap in CDCl<sub>3</sub> (400 MHz)

### *N*-(2-Methoxyphenyl)-2,5-diphenyl-1*H*-pyrrol-3-amine (3aq)

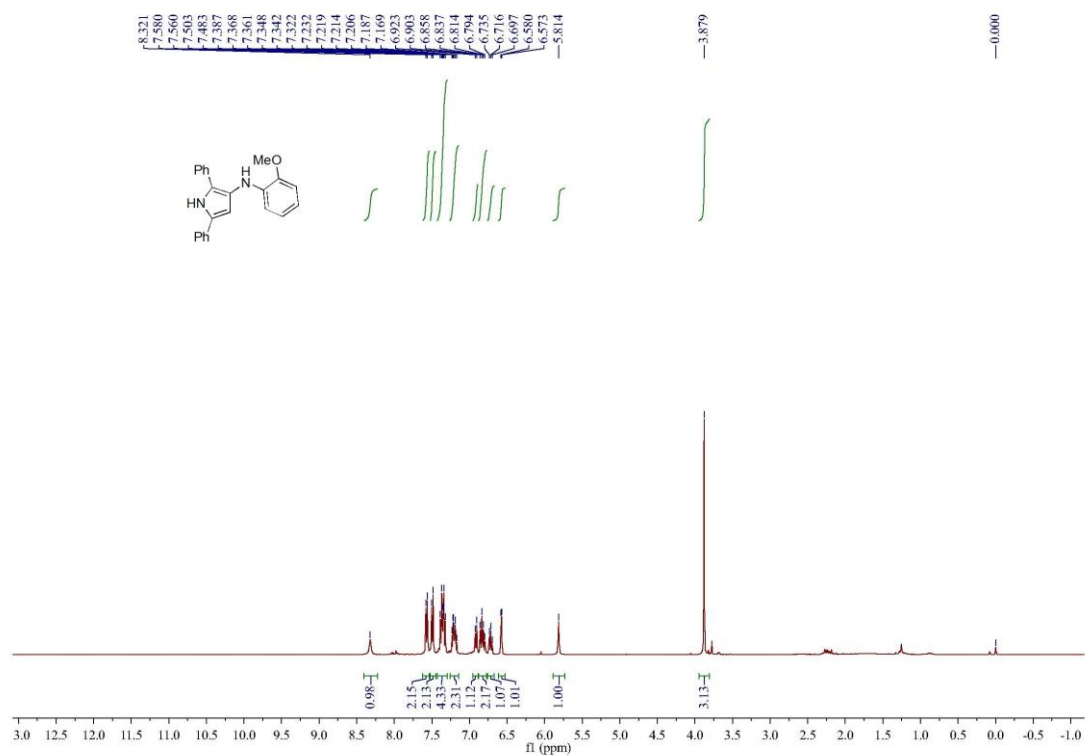

### <sup>1</sup>H NMR spectra of compound 3aq in CDCl<sub>3</sub> (400 MHz)

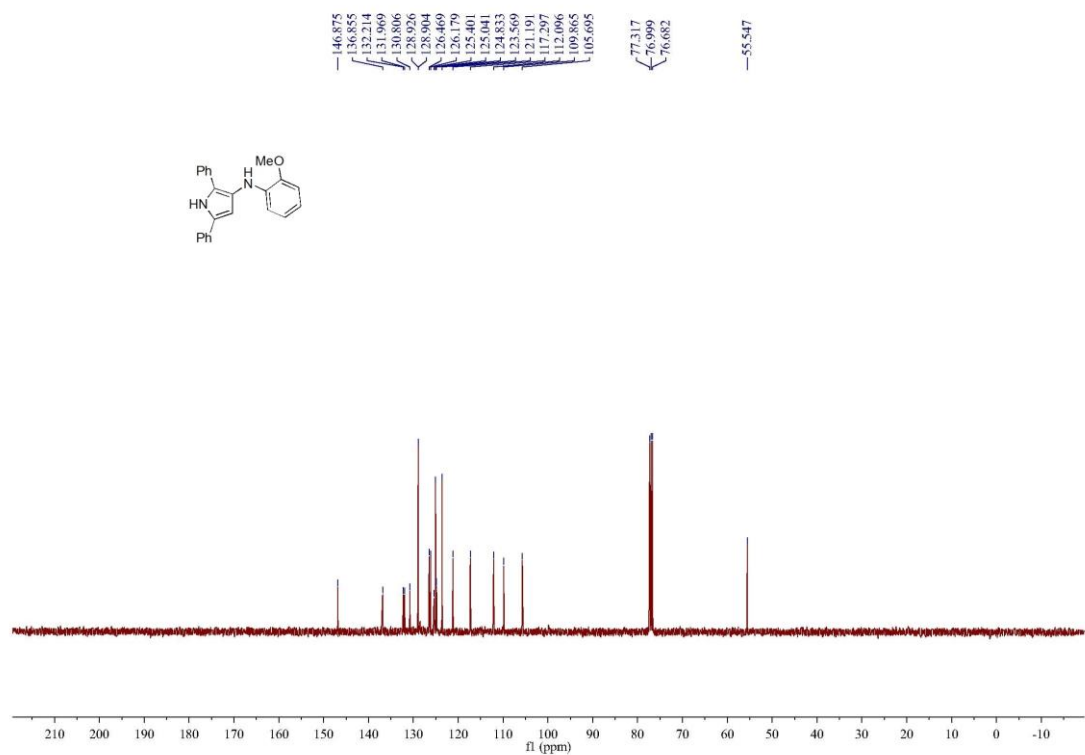

### <sup>13</sup>C NMR spectra of compound 3aq in CDCl<sub>3</sub> (400 MHz)

### 2,5-diphenyl-3-(phenylamino)-3,4-dihydro-2H-pyrrol-2-ol (4aa)

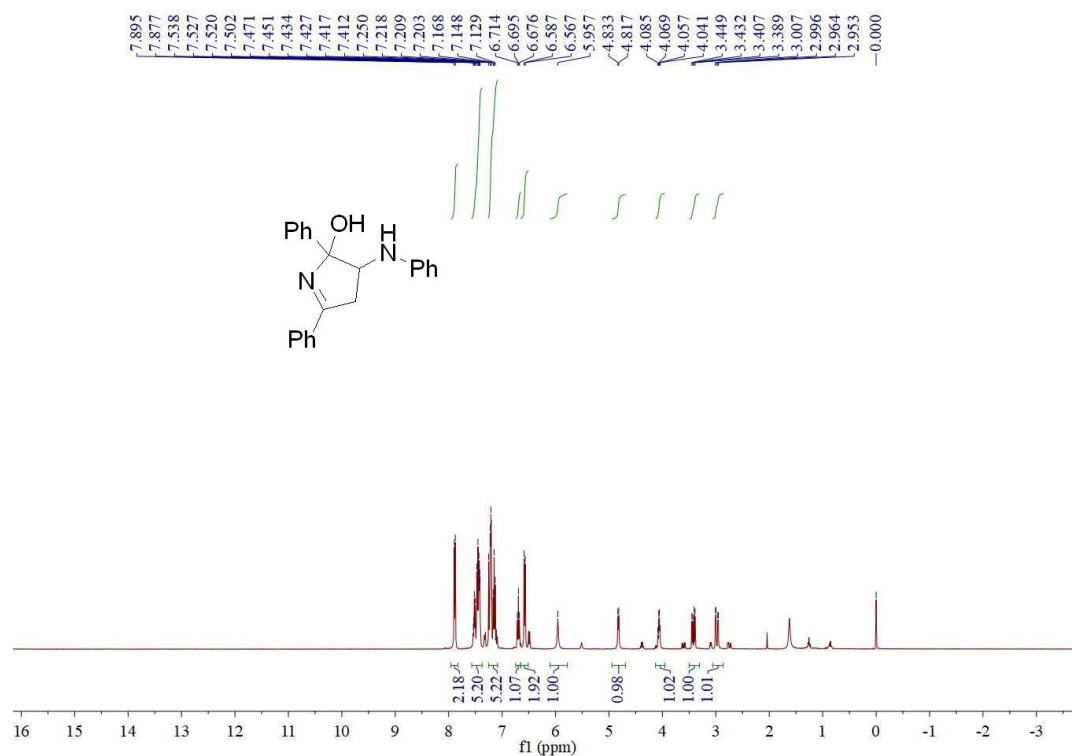

### <sup>13</sup>C NMR spectra of compound 4aa in CDCl<sub>3</sub> (400 MHz)

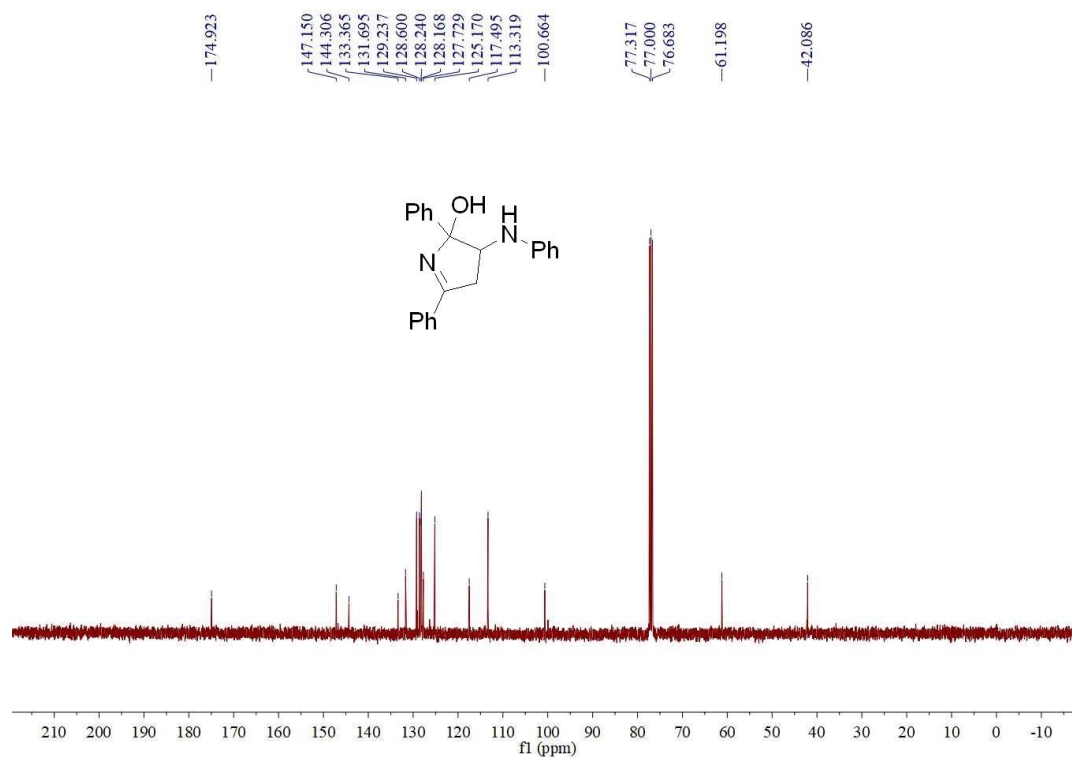

### <sup>13</sup>C NMR spectra of compound 4aa in CDCl<sub>3</sub> (400 MHz)

### 4-Methyl-2,2,5-triphenyl-3,4-dihydro-2H-pyrrole (7)

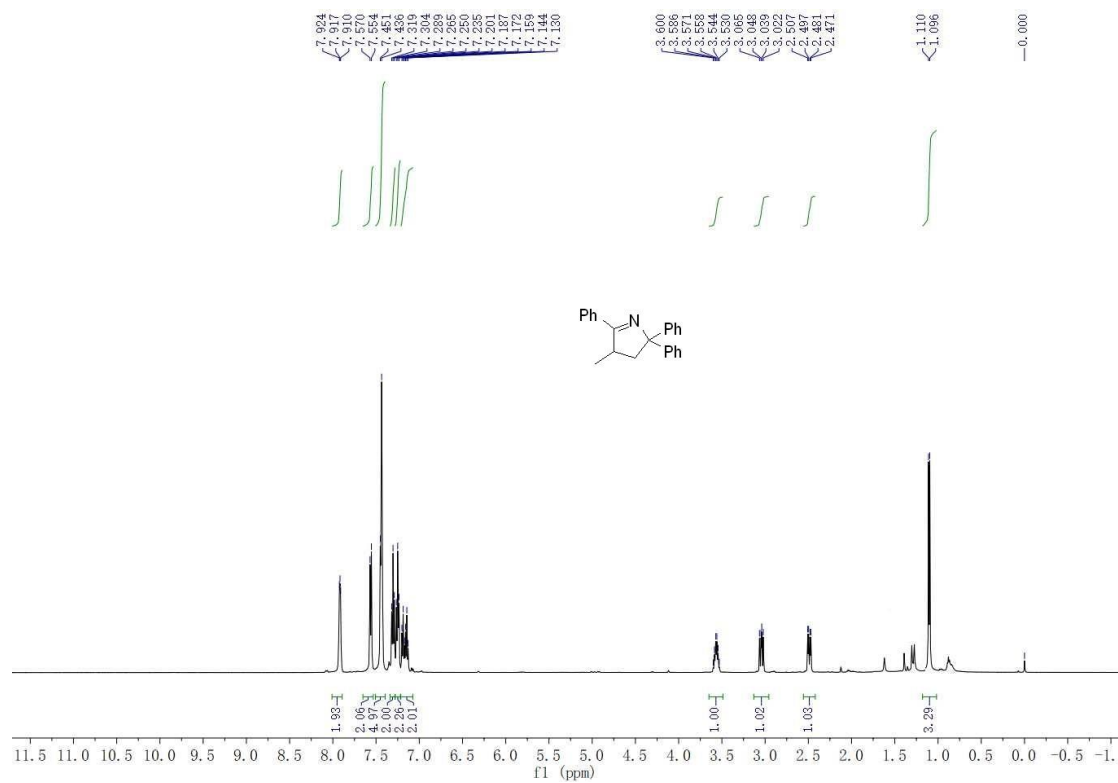

### <sup>13</sup>C NMR spectra of compound 7 in CDCl<sub>3</sub> (400 MHz)

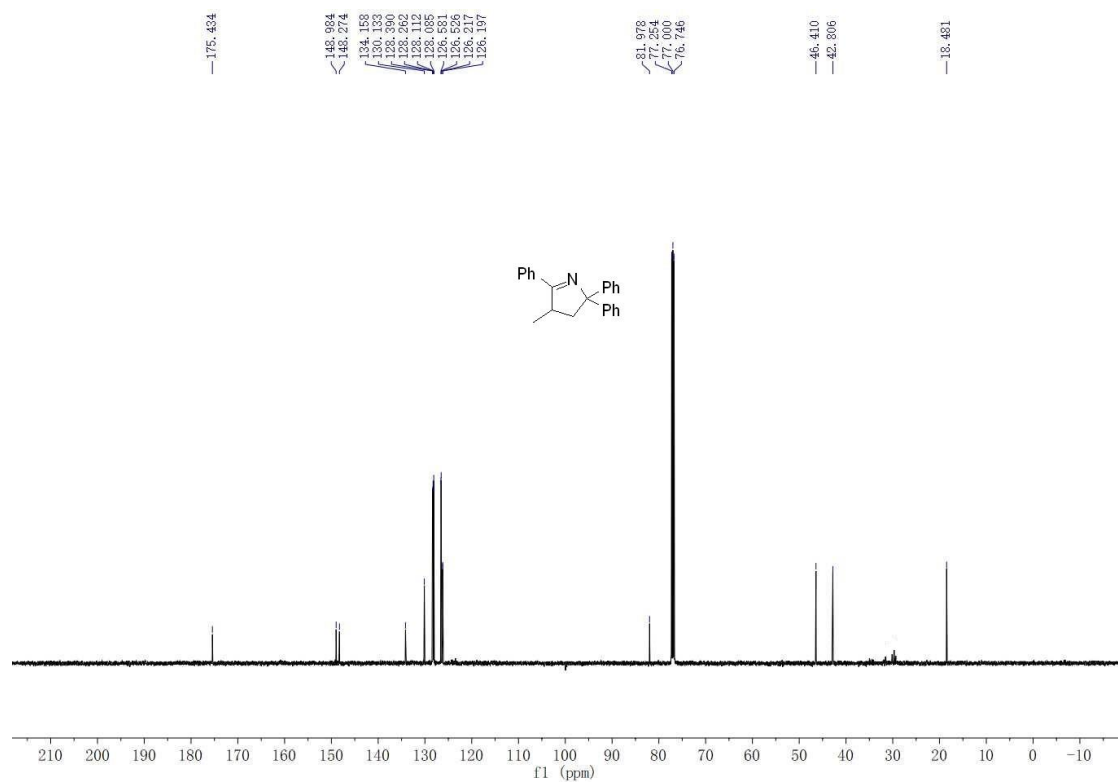

### <sup>13</sup>C NMR spectra of compound 7 in CDCl<sub>3</sub> (400 MHz)

### 2-Methyl-5-phenyl-1H-pyrrole (8)

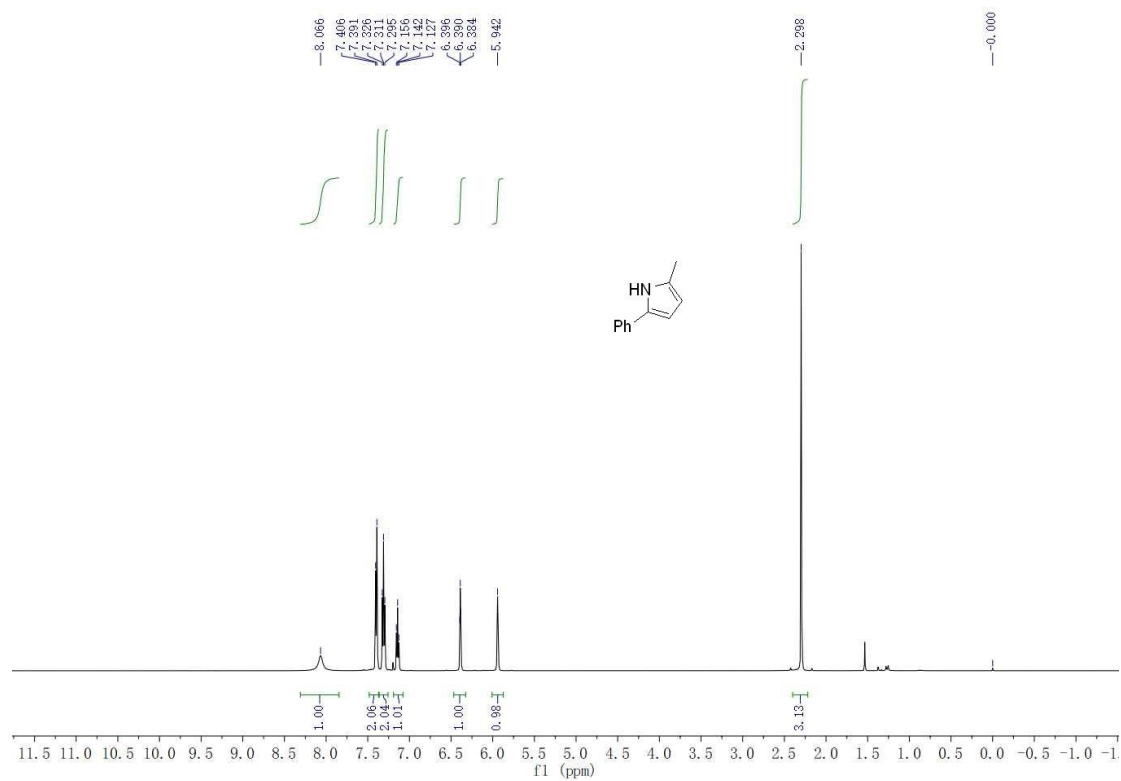

### <sup>1</sup>H NMR spectra of compound 8 in CDCl<sub>3</sub> (400 MHz)

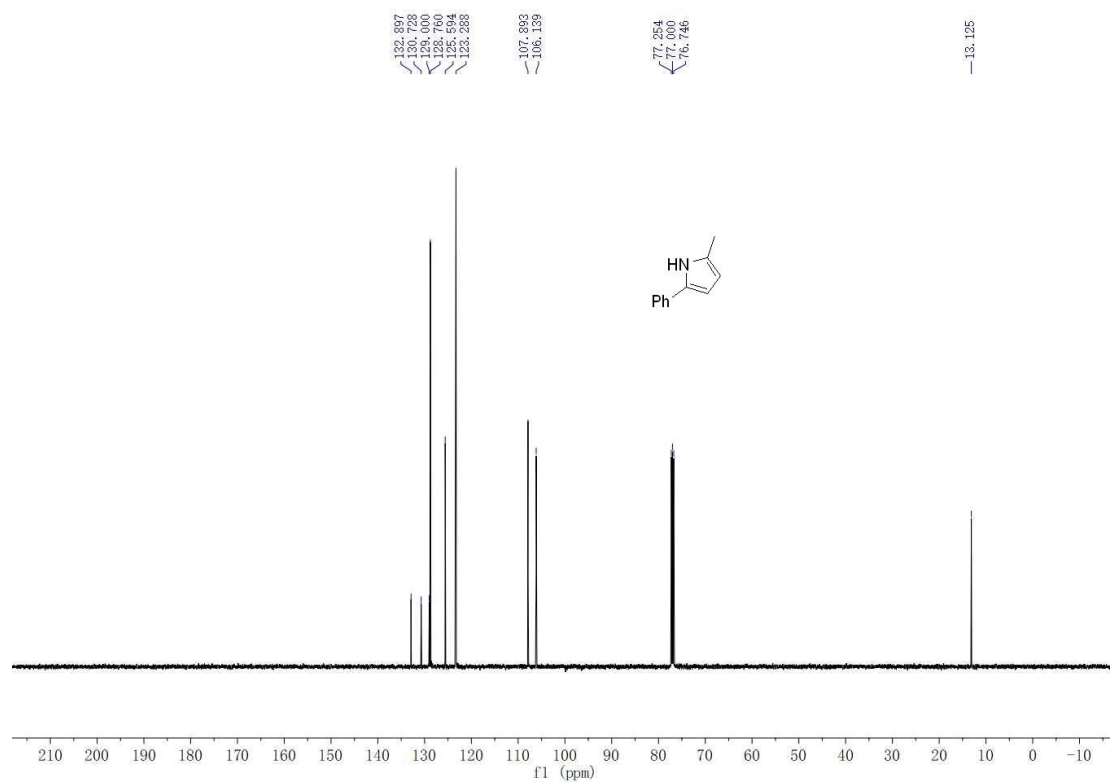

### <sup>13</sup>C NMR spectra of compound 8 in CDCl<sub>3</sub> (400 MHz)

### 2-Phenyl-1H-pyrrole (9)

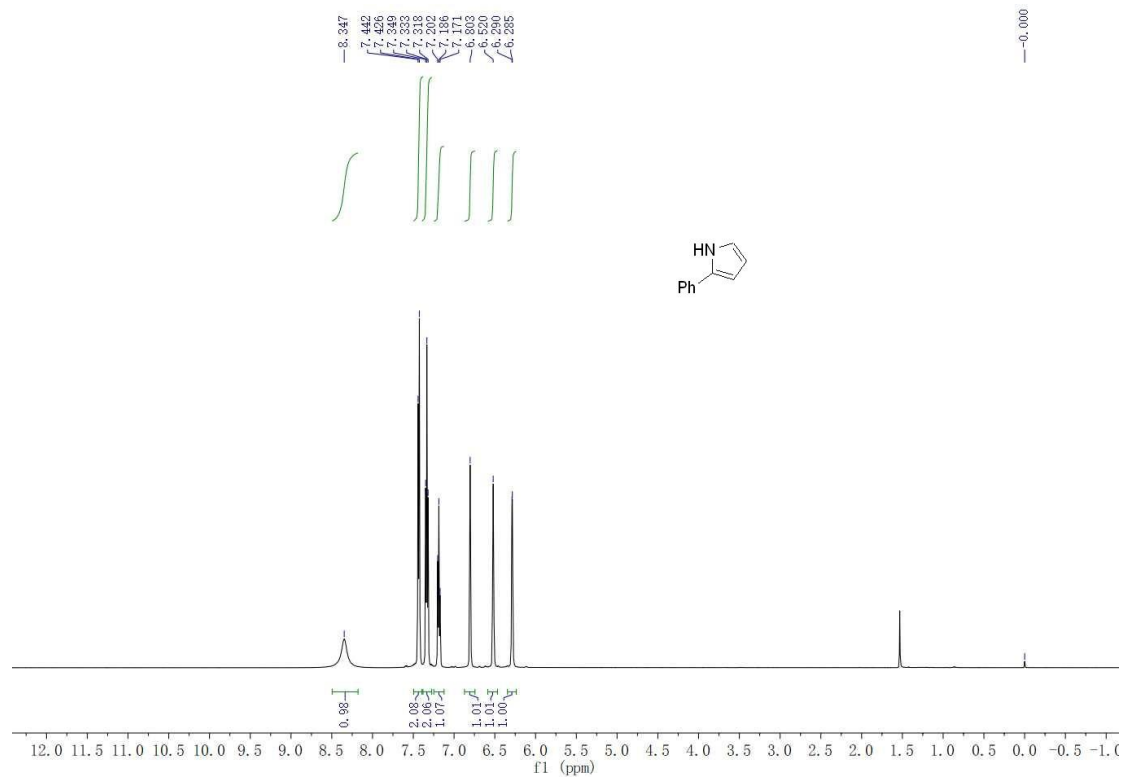

### <sup>1</sup>H NMR spectra of compound 9 in CDCl<sub>3</sub> (400 MHz)

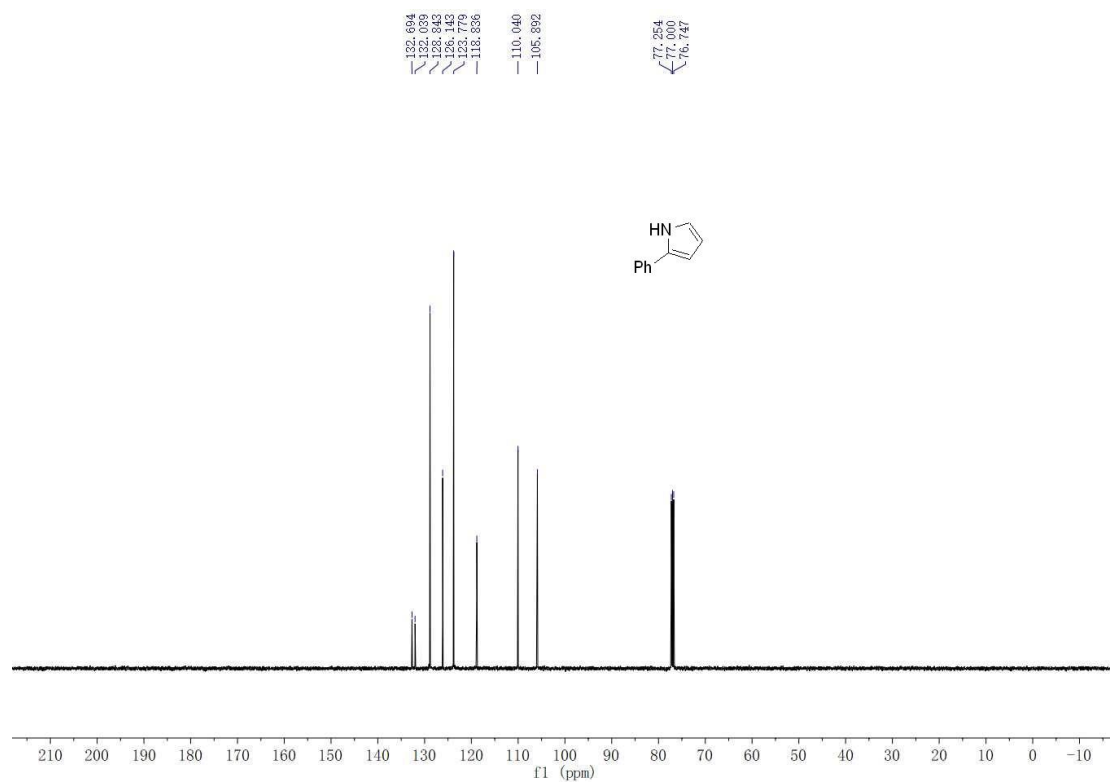

### <sup>13</sup>C NMR spectra of compound 9 in CDCl<sub>3</sub> (400 MHz)

### 3-(acetoxyimino)-1,3-diphenylpropan-1-one (1v)

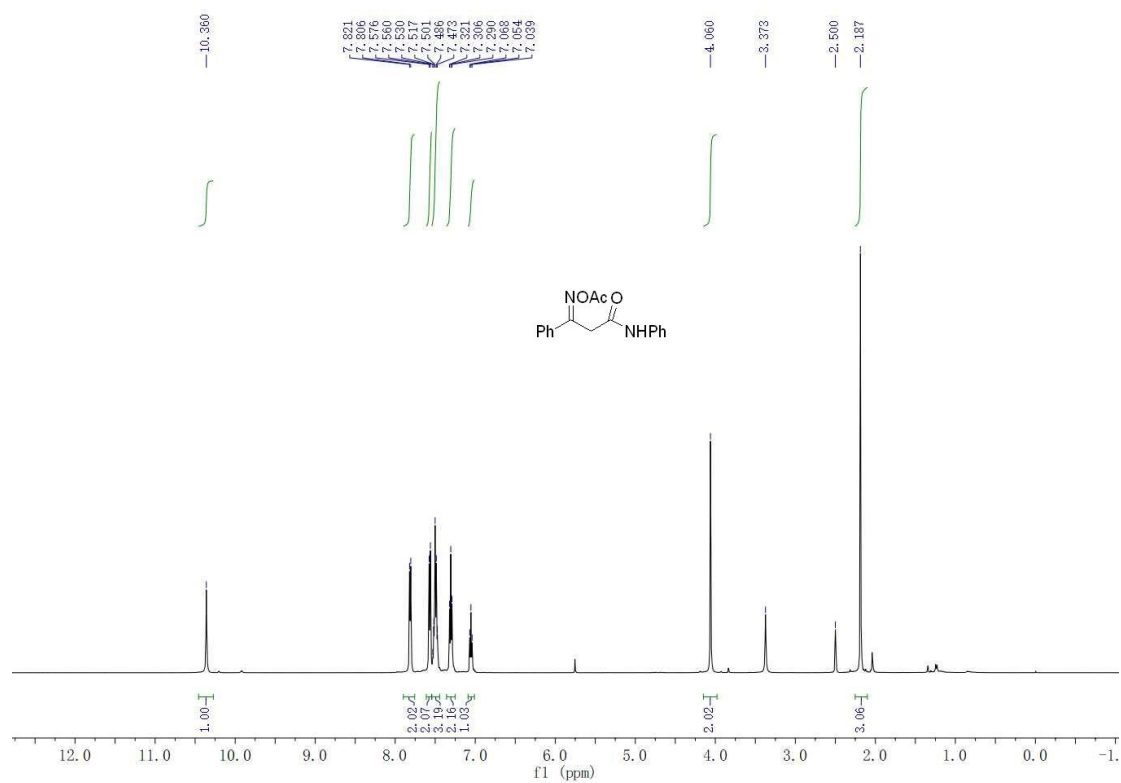

### <sup>1</sup>H NMR spectra of compound 1v in DMSO-*d*<sub>6</sub> (400 MHz)

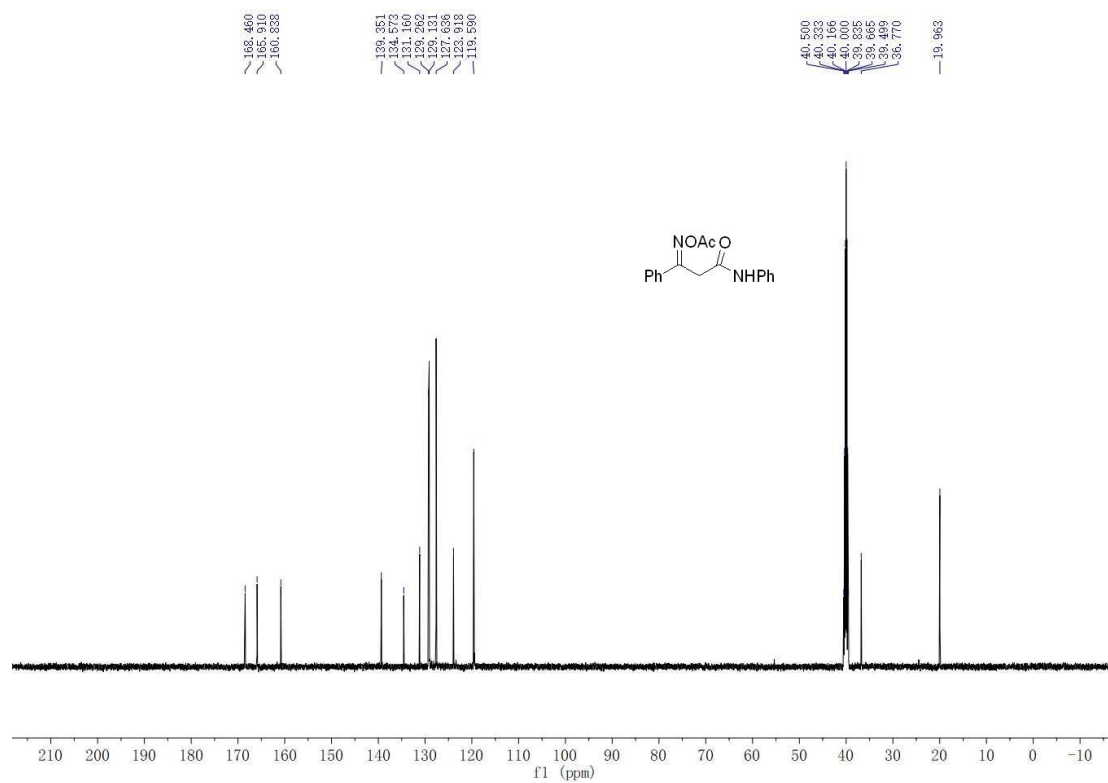

### <sup>13</sup>C NMR spectra of compound 1v in DMSO-*d*<sub>6</sub> (400 MHz)

### 3-(acetoxyimino)-1,3-diphenylpropan-1-one (1w)

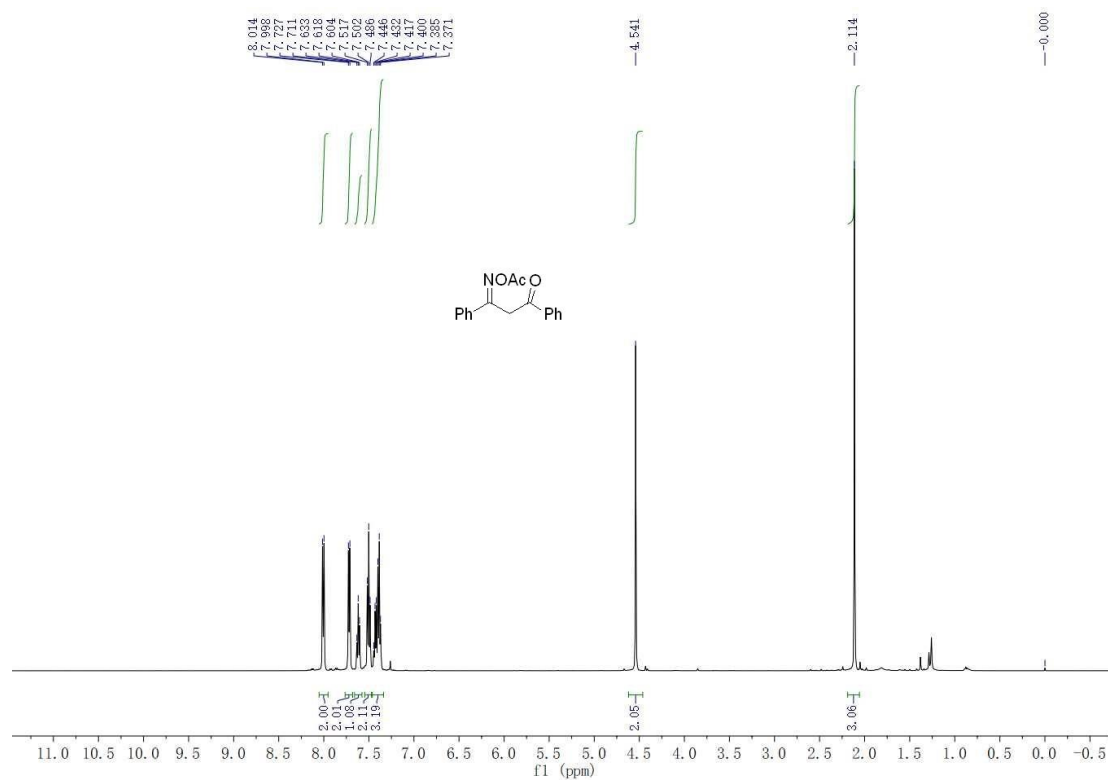

### <sup>1</sup>H NMR spectra of compound 1w in CDCl<sub>3</sub> (400 MHz)

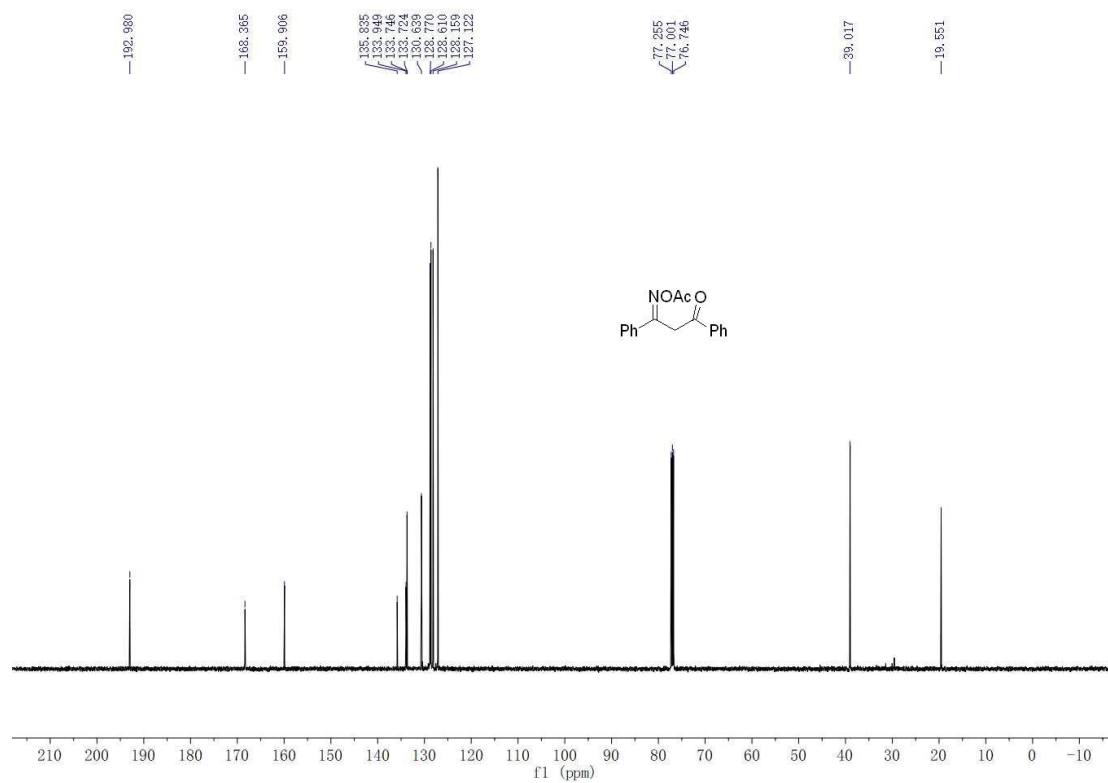

### <sup>13</sup>C NMR spectra of compound 1w in CDCl<sub>3</sub> (400 MHz)



(D) The X-Ray Single-Crystal Diffraction Analysis of 3a (CCDC: 2060673)

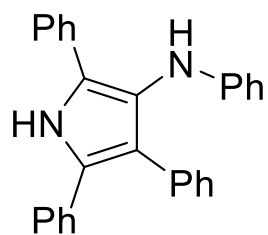

3a

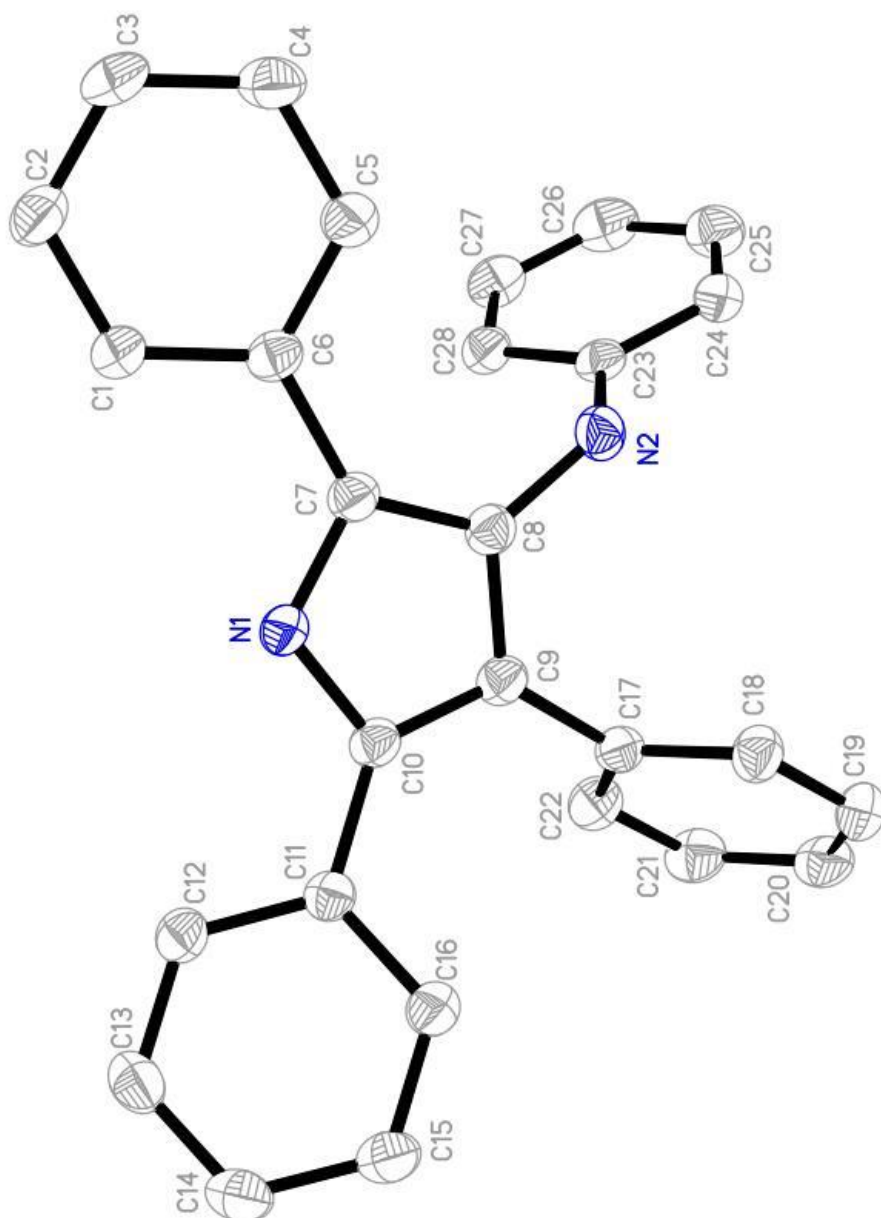

**Table S1. Crystal data and structure refinement for mo\_20141115A\_0m.**

|                                   |                                                                                                                        |
|-----------------------------------|------------------------------------------------------------------------------------------------------------------------|
| Identification code               | mo_20141115a_0m                                                                                                        |
| Empirical formula                 | C <sub>28</sub> H <sub>22</sub> N <sub>2</sub>                                                                         |
| Formula weight                    | 386.48                                                                                                                 |
| Temperature                       | 298(2) K                                                                                                               |
| Wavelength                        | 0.71073 Å                                                                                                              |
| Crystal system, space group       | Monoclinic, C 2/c                                                                                                      |
| Unit cell dimensions              | a = 37.838(9) Å    alpha = 90 deg.<br>b = 5.7784(14) Å    beta = 108.615(4) deg.<br>c = 19.980(5) Å    gamma = 90 deg. |
| Volume                            | 4140.0(18) Å <sup>3</sup>                                                                                              |
| Z, Calculated density             | 8, 1.240 Mg/m <sup>3</sup>                                                                                             |
| Absorption coefficient            | 0.072 mm <sup>-1</sup>                                                                                                 |
| F(000)                            | 1632                                                                                                                   |
| Crystal size                      | 0.25 x 0.19 x 0.15 mm                                                                                                  |
| Theta range for data collection   | 2.09 to 26.00 deg.                                                                                                     |
| Limiting indices                  | -46<=h<=46, -6<=k<=7, -24<=l<=24                                                                                       |
| Reflections collected / unique    | 16356 / 4063 [R(int) = 0.0233]                                                                                         |
| Completeness to theta = 26.00     | 99.8 %                                                                                                                 |
| Absorption correction             | Semi-empirical from equivalents                                                                                        |
| Max. and min. transmission        | 0.9892 and 0.9821                                                                                                      |
| Refinement method                 | Full-matrix least-squares on F <sup>2</sup>                                                                            |
| Data / restraints / parameters    | 4063 / 0 / 271                                                                                                         |
| Goodness-of-fit on F <sup>2</sup> | 1.043                                                                                                                  |
| Final R indices [I>2sigma(I)]     | R1 = 0.0463, wR2 = 0.1260                                                                                              |
| R indices (all data)              | R1 = 0.0566, wR2 = 0.1316                                                                                              |
| Largest diff. peak and hole       | 0.337 and -0.321 e.Å <sup>-3</sup>                                                                                     |

**Table S2. Atomic coordinates (  $\times 10^4$ ) and equivalent isotropic displacement parameters ( $\text{\AA}^2 \times 10^3$ ) for mo\_20141115A\_0m. U(eq) is defined as one third of the trace of the orthogonalized Uij tensor.**

|       | x       | y        | z        | U(eq) |
|-------|---------|----------|----------|-------|
| N(1)  | 1730(1) | 2662(2)  | 1216(1)  | 40(1) |
| N(2)  | 1142(1) | 7348(2)  | 1388(1)  | 45(1) |
| C(1)  | 2178(1) | 3256(3)  | 2686(1)  | 46(1) |
| C(2)  | 2407(1) | 3631(4)  | 3373(1)  | 52(1) |
| C(3)  | 2376(1) | 5631(4)  | 3724(1)  | 52(1) |
| C(4)  | 2117(1) | 7279(4)  | 3381(1)  | 54(1) |
| C(5)  | 1887(1) | 6921(3)  | 2694(1)  | 49(1) |
| C(6)  | 1911(1) | 4889(3)  | 2334(1)  | 40(1) |
| C(7)  | 1659(1) | 4432(3)  | 1617(1)  | 40(1) |
| C(8)  | 1321(1) | 5394(3)  | 1215(1)  | 40(1) |
| C(9)  | 1184(1) | 4131(3)  | 571(1)   | 40(1) |
| C(10) | 1450(1) | 2466(3)  | 577(1)   | 38(1) |
| C(11) | 1487(1) | 852(3)   | 36(1)    | 37(1) |
| C(12) | 1693(1) | -1192(3) | 224(1)   | 44(1) |
| C(13) | 1739(1) | -2670(3) | -286(1)  | 53(1) |
| C(14) | 1575(1) | -2173(3) | -994(1)  | 54(1) |
| C(15) | 1367(1) | -176(3)  | -1187(1) | 51(1) |
| C(16) | 1325(1) | 1337(3)  | -683(1)  | 44(1) |
| C(17) | 811(1)  | 4487(3)  | 33(1)    | 40(1) |
| C(18) | 721(1)  | 6509(3)  | -358(1)  | 48(1) |
| C(19) | 367(1)  | 6859(4)  | -838(1)  | 60(1) |
| C(20) | 94(1)   | 5155(4)  | -934(1)  | 60(1) |
| C(21) | 184(1)  | 3156(4)  | -547(1)  | 57(1) |
| C(22) | 538(1)  | 2812(3)  | -72(1)   | 52(1) |
| C(23) | 928(1)  | 7288(3)  | 1839(1)  | 39(1) |
| C(24) | 699(1)  | 9169(3)  | 1856(1)  | 46(1) |
| C(25) | 492(1)  | 9163(4)  | 2313(1)  | 59(1) |
| C(26) | 504(1)  | 7333(4)  | 2759(1)  | 63(1) |
| C(27) | 729(1)  | 5492(4)  | 2743(1)  | 54(1) |
| C(28) | 942(1)  | 5414(3)  | 2294(1)  | 44(1) |

**Table S3. Bond lengths [Å] and angles [deg] for mo\_20141115A\_0m.**

---

|             |            |
|-------------|------------|
| N(1)-C(7)   | 1.376(2)   |
| N(1)-C(10)  | 1.3787(19) |
| N(1)-H(1A)  | 0.8600     |
| N(2)-C(23)  | 1.393(2)   |
| N(2)-C(8)   | 1.415(2)   |
| N(2)-H(2A)  | 0.8600     |
| C(1)-C(2)   | 1.387(2)   |
| C(1)-C(6)   | 1.398(2)   |
| C(1)-H(1)   | 0.9300     |
| C(2)-C(3)   | 1.377(3)   |
| C(2)-H(2)   | 0.9300     |
| C(3)-C(4)   | 1.381(3)   |
| C(3)-H(3)   | 0.9300     |
| C(4)-C(5)   | 1.386(2)   |
| C(4)-H(4)   | 0.9300     |
| C(5)-C(6)   | 1.395(2)   |
| C(5)-H(5)   | 0.9300     |
| C(6)-C(7)   | 1.470(2)   |
| C(7)-C(8)   | 1.391(2)   |
| C(8)-C(9)   | 1.426(2)   |
| C(9)-C(10)  | 1.389(2)   |
| C(9)-C(17)  | 1.492(2)   |
| C(10)-C(11) | 1.469(2)   |
| C(11)-C(16) | 1.397(2)   |
| C(11)-C(12) | 1.399(2)   |
| C(12)-C(13) | 1.381(2)   |
| C(12)-H(12) | 0.9300     |
| C(13)-C(14) | 1.381(3)   |
| C(13)-H(13) | 0.9300     |
| C(14)-C(15) | 1.381(3)   |
| C(14)-H(14) | 0.9300     |
| C(15)-C(16) | 1.381(2)   |
| C(15)-H(15) | 0.9300     |
| C(16)-H(16) | 0.9300     |
| C(17)-C(22) | 1.382(2)   |
| C(17)-C(18) | 1.386(2)   |
| C(18)-C(19) | 1.389(2)   |
| C(18)-H(18) | 0.9300     |
| C(19)-C(20) | 1.395(3)   |
| C(19)-H(19) | 0.9300     |
| C(20)-C(21) | 1.371(3)   |
| C(20)-H(20) | 0.9300     |

|                  |            |
|------------------|------------|
| C(21)-C(22)      | 1.385(3)   |
| C(21)-H(21)      | 0.9300     |
| C(22)-H(22)      | 0.9300     |
| C(23)-C(24)      | 1.395(2)   |
| C(23)-C(28)      | 1.404(2)   |
| C(24)-C(25)      | 1.382(2)   |
| C(24)-H(24)      | 0.9300     |
| C(25)-C(26)      | 1.374(3)   |
| C(25)-H(25)      | 0.9300     |
| C(26)-C(27)      | 1.370(3)   |
| C(26)-H(26)      | 0.9300     |
| C(27)-C(28)      | 1.384(2)   |
| C(27)-H(27)      | 0.9300     |
| C(28)-H(28)      | 0.9300     |
| C(7)-N(1)-C(10)  | 111.44(13) |
| C(7)-N(1)-H(1A)  | 124.3      |
| C(10)-N(1)-H(1A) | 124.3      |
| C(23)-N(2)-C(8)  | 124.18(13) |
| C(23)-N(2)-H(2A) | 117.9      |
| C(8)-N(2)-H(2A)  | 117.9      |
| C(2)-C(1)-C(6)   | 121.03(16) |
| C(2)-C(1)-H(1)   | 119.5      |
| C(6)-C(1)-H(1)   | 119.5      |
| C(3)-C(2)-C(1)   | 120.44(17) |
| C(3)-C(2)-H(2)   | 119.8      |
| C(1)-C(2)-H(2)   | 119.8      |
| C(2)-C(3)-C(4)   | 119.29(16) |
| C(2)-C(3)-H(3)   | 120.4      |
| C(4)-C(3)-H(3)   | 120.4      |
| C(3)-C(4)-C(5)   | 120.68(17) |
| C(3)-C(4)-H(4)   | 119.7      |
| C(5)-C(4)-H(4)   | 119.7      |
| C(4)-C(5)-C(6)   | 120.80(17) |
| C(4)-C(5)-H(5)   | 119.6      |
| C(6)-C(5)-H(5)   | 119.6      |
| C(5)-C(6)-C(1)   | 117.75(15) |
| C(5)-C(6)-C(7)   | 121.70(15) |
| C(1)-C(6)-C(7)   | 120.54(15) |
| N(1)-C(7)-C(8)   | 105.95(13) |
| N(1)-C(7)-C(6)   | 121.04(14) |
| C(8)-C(7)-C(6)   | 132.92(15) |
| C(7)-C(8)-N(2)   | 127.04(14) |
| C(7)-C(8)-C(9)   | 108.60(14) |
| N(2)-C(8)-C(9)   | 124.33(14) |

|                   |            |
|-------------------|------------|
| C(10)-C(9)-C(8)   | 107.00(13) |
| C(10)-C(9)-C(17)  | 128.24(14) |
| C(8)-C(9)-C(17)   | 124.61(14) |
| N(1)-C(10)-C(9)   | 106.95(13) |
| N(1)-C(10)-C(11)  | 120.57(13) |
| C(9)-C(10)-C(11)  | 132.24(14) |
| C(16)-C(11)-C(12) | 118.04(14) |
| C(16)-C(11)-C(10) | 121.01(14) |
| C(12)-C(11)-C(10) | 120.94(14) |
| C(13)-C(12)-C(11) | 120.91(16) |
| C(13)-C(12)-H(12) | 119.5      |
| C(11)-C(12)-H(12) | 119.5      |
| C(12)-C(13)-C(14) | 120.35(17) |
| C(12)-C(13)-H(13) | 119.8      |
| C(14)-C(13)-H(13) | 119.8      |
| C(15)-C(14)-C(13) | 119.34(16) |
| C(15)-C(14)-H(14) | 120.3      |
| C(13)-C(14)-H(14) | 120.3      |
| C(14)-C(15)-C(16) | 120.84(16) |
| C(14)-C(15)-H(15) | 119.6      |
| C(16)-C(15)-H(15) | 119.6      |
| C(15)-C(16)-C(11) | 120.50(16) |
| C(15)-C(16)-H(16) | 119.7      |
| C(11)-C(16)-H(16) | 119.7      |
| C(22)-C(17)-C(18) | 117.85(15) |
| C(22)-C(17)-C(9)  | 120.22(15) |
| C(18)-C(17)-C(9)  | 121.89(15) |
| C(17)-C(18)-C(19) | 121.40(17) |
| C(17)-C(18)-H(18) | 119.3      |
| C(19)-C(18)-H(18) | 119.3      |
| C(18)-C(19)-C(20) | 119.94(19) |
| C(18)-C(19)-H(19) | 120.0      |
| C(20)-C(19)-H(19) | 120.0      |
| C(21)-C(20)-C(19) | 118.56(17) |
| C(21)-C(20)-H(20) | 120.7      |
| C(19)-C(20)-H(20) | 120.7      |
| C(20)-C(21)-C(22) | 121.23(18) |
| C(20)-C(21)-H(21) | 119.4      |
| C(22)-C(21)-H(21) | 119.4      |
| C(17)-C(22)-C(21) | 121.01(18) |
| C(17)-C(22)-H(22) | 119.5      |
| C(21)-C(22)-H(22) | 119.5      |
| N(2)-C(23)-C(28)  | 121.91(14) |
| C(24)-C(23)-C(28) | 118.74(15) |

|                   |            |
|-------------------|------------|
| C(25)-C(24)-C(23) | 120.07(17) |
| C(25)-C(24)-H(24) | 120.0      |
| C(23)-C(24)-H(24) | 120.0      |
| C(26)-C(25)-C(24) | 121.45(18) |
| C(26)-C(25)-H(25) | 119.3      |
| C(24)-C(25)-H(25) | 119.3      |
| C(27)-C(26)-C(25) | 118.39(17) |
| C(27)-C(26)-H(26) | 120.8      |
| C(25)-C(26)-H(26) | 120.8      |
| C(26)-C(27)-C(28) | 122.30(18) |
| C(26)-C(27)-H(27) | 118.8      |
| C(28)-C(27)-H(27) | 118.8      |
| C(27)-C(28)-C(23) | 119.05(16) |
| C(27)-C(28)-H(28) | 120.5      |
| C(23)-C(28)-H(28) | 120.5      |

---

Symmetry transformations used to generate equivalent atoms:

**Table S4. Anisotropic displacement parameters ( $\text{\AA}^2 \times 10^3$ ) for mo\_20141115A\_0m.**

**The anisotropic displacement factor exponent takes the form:  $-2 \pi^2 [ h^2 a^{*2} U11 + \dots + 2 h k a^* b^* U12 ]$**

|       | U11   | U22   | U33   | U23    | U13   | U12    |
|-------|-------|-------|-------|--------|-------|--------|
| N(1)  | 34(1) | 46(1) | 36(1) | -2(1)  | 5(1)  | 7(1)   |
| N(2)  | 53(1) | 41(1) | 43(1) | 6(1)   | 19(1) | 6(1)   |
| C(1)  | 45(1) | 46(1) | 41(1) | -3(1)  | 4(1)  | 1(1)   |
| C(2)  | 44(1) | 59(1) | 45(1) | 3(1)   | 1(1)  | -1(1)  |
| C(3)  | 40(1) | 71(1) | 39(1) | -7(1)  | 4(1)  | -11(1) |
| C(4)  | 47(1) | 60(1) | 53(1) | -19(1) | 12(1) | -7(1)  |
| C(5)  | 43(1) | 51(1) | 48(1) | -6(1)  | 8(1)  | 1(1)   |
| C(6)  | 34(1) | 47(1) | 37(1) | -3(1)  | 10(1) | -5(1)  |
| C(7)  | 37(1) | 44(1) | 36(1) | -3(1)  | 9(1)  | 1(1)   |
| C(8)  | 39(1) | 44(1) | 37(1) | 2(1)   | 12(1) | 2(1)   |
| C(9)  | 36(1) | 46(1) | 36(1) | 0(1)   | 9(1)  | 1(1)   |
| C(10) | 33(1) | 44(1) | 35(1) | -2(1)  | 7(1)  | -1(1)  |
| C(11) | 30(1) | 41(1) | 38(1) | -3(1)  | 8(1)  | -3(1)  |
| C(12) | 36(1) | 48(1) | 42(1) | -1(1)  | 5(1)  | 0(1)   |
| C(13) | 43(1) | 46(1) | 66(1) | -9(1)  | 14(1) | 5(1)   |
| C(14) | 51(1) | 60(1) | 52(1) | -18(1) | 19(1) | -2(1)  |
| C(15) | 51(1) | 64(1) | 38(1) | -6(1)  | 13(1) | -2(1)  |
| C(16) | 43(1) | 47(1) | 40(1) | 1(1)   | 10(1) | 2(1)   |
| C(17) | 38(1) | 45(1) | 34(1) | -2(1)  | 11(1) | 4(1)   |
| C(18) | 43(1) | 47(1) | 47(1) | 3(1)   | 7(1)  | 1(1)   |
| C(19) | 61(1) | 61(1) | 48(1) | 4(1)   | 3(1)  | 19(1)  |
| C(20) | 40(1) | 80(1) | 50(1) | -14(1) | 2(1)  | 10(1)  |
| C(21) | 39(1) | 73(1) | 55(1) | -10(1) | 7(1)  | -8(1)  |
| C(22) | 47(1) | 58(1) | 48(1) | 0(1)   | 11(1) | -2(1)  |
| C(23) | 34(1) | 46(1) | 33(1) | -6(1)  | 5(1)  | -4(1)  |
| C(24) | 47(1) | 45(1) | 43(1) | -2(1)  | 9(1)  | 5(1)   |
| C(25) | 49(1) | 71(1) | 57(1) | -12(1) | 18(1) | 6(1)   |
| C(26) | 54(1) | 87(2) | 54(1) | -9(1)  | 25(1) | -7(1)  |
| C(27) | 53(1) | 65(1) | 46(1) | 2(1)   | 18(1) | -10(1) |
| C(28) | 43(1) | 47(1) | 40(1) | 0(1)   | 9(1)  | 0(1)   |



**Table S5. Hydrogen coordinates (  $\times 10^4$ ) and isotropic displacement parameters ( $\text{\AA}^2 \times 10^3$ ) for mo\_20141115A\_0m.**

|       | x    | y     | z     | U(eq) |
|-------|------|-------|-------|-------|
| H(1A) | 1924 | 1788  | 1348  | 48    |
| H(2A) | 1167 | 8655  | 1202  | 54    |
| H(1)  | 2203 | 1896  | 2455  | 56    |
| H(2)  | 2584 | 2523  | 3598  | 63    |
| H(3)  | 2527 | 5870  | 4187  | 62    |
| H(4)  | 2097 | 8644  | 3613  | 65    |
| H(5)  | 1714 | 8048  | 2471  | 58    |
| H(12) | 1801 | -1560 | 699   | 52    |
| H(13) | 1880 | -4008 | -151  | 63    |
| H(14) | 1604 | -3173 | -1337 | 65    |
| H(15) | 1253 | 155   | -1663 | 61    |
| H(16) | 1188 | 2688  | -822  | 53    |
| H(18) | 901  | 7656  | -298  | 57    |
| H(19) | 313  | 8227  | -1096 | 72    |
| H(20) | -144 | 5371  | -1252 | 72    |
| H(21) | 4    | 2008  | -605  | 69    |
| H(22) | 592  | 1433  | 180   | 62    |
| H(24) | 687  | 10427 | 1559  | 56    |
| H(25) | 340  | 10425 | 2319  | 71    |
| H(26) | 364  | 7346  | 3065  | 76    |
| H(27) | 740  | 4249  | 3045  | 65    |
| H(28) | 1092 | 4139  | 2293  | 53    |

**Table S6. Torsion angles [deg] for mo\_20141115A\_0m.**

---

|                         |             |
|-------------------------|-------------|
| C(6)-C(1)-C(2)-C(3)     | 0.0(3)      |
| C(1)-C(2)-C(3)-C(4)     | -1.0(3)     |
| C(2)-C(3)-C(4)-C(5)     | 0.9(3)      |
| C(3)-C(4)-C(5)-C(6)     | 0.0(3)      |
| C(4)-C(5)-C(6)-C(1)     | -0.9(2)     |
| C(4)-C(5)-C(6)-C(7)     | 177.50(16)  |
| C(2)-C(1)-C(6)-C(5)     | 0.9(2)      |
| C(2)-C(1)-C(6)-C(7)     | -177.53(15) |
| C(10)-N(1)-C(7)-C(8)    | 0.03(18)    |
| C(10)-N(1)-C(7)-C(6)    | 176.95(14)  |
| C(5)-C(6)-C(7)-N(1)     | 167.34(15)  |
| C(1)-C(6)-C(7)-N(1)     | -14.3(2)    |
| C(5)-C(6)-C(7)-C(8)     | -16.7(3)    |
| C(1)-C(6)-C(7)-C(8)     | 161.67(17)  |
| N(1)-C(7)-C(8)-N(2)     | -176.40(14) |
| C(6)-C(7)-C(8)-N(2)     | 7.2(3)      |
| N(1)-C(7)-C(8)-C(9)     | 1.44(18)    |
| C(6)-C(7)-C(8)-C(9)     | -174.94(16) |
| C(23)-N(2)-C(8)-C(7)    | -81.0(2)    |
| C(23)-N(2)-C(8)-C(9)    | 101.46(19)  |
| C(7)-C(8)-C(9)-C(10)    | -2.38(18)   |
| N(2)-C(8)-C(9)-C(10)    | 175.54(14)  |
| C(7)-C(8)-C(9)-C(17)    | 173.54(15)  |
| N(2)-C(8)-C(9)-C(17)    | -8.5(2)     |
| C(7)-N(1)-C(10)-C(9)    | -1.52(18)   |
| C(7)-N(1)-C(10)-C(11)   | 173.49(14)  |
| C(8)-C(9)-C(10)-N(1)    | 2.34(17)    |
| C(17)-C(9)-C(10)-N(1)   | -173.38(15) |
| C(8)-C(9)-C(10)-C(11)   | -171.86(16) |
| C(17)-C(9)-C(10)-C(11)  | 12.4(3)     |
| N(1)-C(10)-C(11)-C(16)  | -148.39(15) |
| C(9)-C(10)-C(11)-C(16)  | 25.2(3)     |
| N(1)-C(10)-C(11)-C(12)  | 30.1(2)     |
| C(9)-C(10)-C(11)-C(12)  | -156.33(17) |
| C(16)-C(11)-C(12)-C(13) | 0.8(2)      |
| C(10)-C(11)-C(12)-C(13) | -177.76(15) |
| C(11)-C(12)-C(13)-C(14) | -1.2(3)     |
| C(12)-C(13)-C(14)-C(15) | 0.4(3)      |
| C(13)-C(14)-C(15)-C(16) | 0.8(3)      |
| C(14)-C(15)-C(16)-C(11) | -1.2(3)     |
| C(12)-C(11)-C(16)-C(15) | 0.4(2)      |
| C(10)-C(11)-C(16)-C(15) | 178.92(15)  |

|                         |             |
|-------------------------|-------------|
| C(10)-C(9)-C(17)-C(22)  | 64.6(2)     |
| C(8)-C(9)-C(17)-C(22)   | -110.44(19) |
| C(10)-C(9)-C(17)-C(18)  | -117.64(19) |
| C(8)-C(9)-C(17)-C(18)   | 67.3(2)     |
| C(22)-C(17)-C(18)-C(19) | 0.4(3)      |
| C(9)-C(17)-C(18)-C(19)  | -177.46(16) |
| C(17)-C(18)-C(19)-C(20) | 0.1(3)      |
| C(18)-C(19)-C(20)-C(21) | -0.2(3)     |
| C(19)-C(20)-C(21)-C(22) | -0.2(3)     |
| C(18)-C(17)-C(22)-C(21) | -0.7(3)     |
| C(9)-C(17)-C(22)-C(21)  | 177.16(16)  |
| C(20)-C(21)-C(22)-C(17) | 0.6(3)      |
| C(8)-N(2)-C(23)-C(24)   | -166.24(15) |
| C(8)-N(2)-C(23)-C(28)   | 15.6(2)     |
| N(2)-C(23)-C(24)-C(25)  | -178.38(15) |
| C(28)-C(23)-C(24)-C(25) | -0.1(2)     |
| C(23)-C(24)-C(25)-C(26) | 0.1(3)      |
| C(24)-C(25)-C(26)-C(27) | 0.0(3)      |
| C(25)-C(26)-C(27)-C(28) | -0.2(3)     |
| C(26)-C(27)-C(28)-C(23) | 0.2(3)      |
| N(2)-C(23)-C(28)-C(27)  | 178.19(15)  |
| C(24)-C(23)-C(28)-C(27) | 0.0(2)      |

---

Symmetry transformations used to generate equivalent atoms:

## (E) References

- 1 (a) P. C. Too, Y.-F. Wang and S. Chiba, Rhodium(III)-Catalyzed Synthesis of Isoquinolines from Aryl Ketone *O*-Acyloxime Derivatives and Internal Alkynes, *Org. Lett.*, 2010, **12**, 5688-5691; (b) Y. Wei and N. Yoshikai, Modular Pyridine Synthesis from Oximes and Enals through Synergistic Copper/Iminium Catalysis, *J. Am. Chem. Soc.*, 2013, **135**, 3756-3759; (c) H.-B. Yang and N. Selander, Divergent Iron-Catalyzed Couplings of *O*-Acyloximes with Silyl Enol Ethers, *Chem. Eur. J.*, 2017, **23**, 1779-1783; (d) W. Du, M.-N. Zhao, Z.-H. Ren, Y.-Y. Wang and Z.-H. Guan, Copper-catalyzed 5-*endo-trig* cyclization of ketoxime carboxylates: a facile synthesis of 2-arylpyrroles, *Chem. Commun.*, 2014, **50**, 7437-7439.
- 2 (a) F. J. Lakner, M. A. Parker, B. Rogovoy, A. Khvat and A. Ivachtchenko, Synthesis of Novel Trisubstituted Imidazolines, *Synthesis*, 2009, **12**, 1987-1990; (b) M. Pal, N. K. Swamy, P. S. Hameed, S. Padakanti and K. R. Yeleswarapu, A rapid and direct access to symmetrical/unsymmetrical 3,4-diarylmaleimides and pyrrolin-2-ones, *Tetrahedron*, 2004, **60**, 3987-3997; (c) J.-C. Wu, R.-J. Song, Z.-Q. Wang, X.-C. Huang, Y.-X. Xie and J.-H. Li, Copper-Catalyzed C-H Oxidation/Cross-Coupling of  $\alpha$ -Amino Carbonyl Compounds, *Angew. Chem., Int. Ed.*, 2012, **51**, 3453-3457.
- 3 S. Mahato, S. Santra, G. V. Zyryanov and A. Majee, Metal-Free Amidation Reactions of Terminal Alkynes with Benzenesulfonamide, *J. Org. Chem.*, 2019, **84**, 3176-3183.
- 4 X.-J. Tang, Z.-L. Yan, W.-L. Chen, Y.-R. Gao, S. Mao, Y.-L. Zhang and Y.-Q. Wang, Aza-Michael reaction promoted by aqueous sodium carbonate solution, *Tetrahedron Lett.*, 2013, **54**, 2669-2673.
- 5 W. E. Almaraz-Ortiz, A. R. Orea, O. Casadiego-Díaz, A. Reyes-Salgado, A. Mejía-Galindo and R. O. Torres-Ochoa, Divergent copper-catalyzed syntheses of 3-carboxylpyrroles and 3-cyanofurans from *O*-acetyl oximes and  $\beta$ -ketoesters/nitriles, *RSC Adv.*, 2022, **12**, 26673-26679.

6 G. E. Veitch, K. L. Bridgwood, K. Rands-Trevor and S. V. Ley, Magnesium Nitride as a Convenient Source of Ammonia: Preparation of Pyrroles, *Synlett*, 2008, 2597-2600.
